# Supplementary material for: NLRC3 expression in macrophage impairs glycolysis and host immune defense by modulating the NF-κB-NFAT5 complex during septic immunosuppression
Source: PubMed Central journal article supplement — Mol Ther. 2022 Sep 6;31(1):154–73. doi: 10.1016/j.ymthe.2022.08.023 (PMC9840117; doi:10.1016/j.ymthe.2022.08.023), 2022-09-06
Supplement: mmc2.pdf [file mmc2.pdf]

# NLRC3 expression in macrophage impairs glycolysis and host immune defense by modulating the NF- $\kappa$ B-NFAT5 complex during septic immunosuppression

Jiqian Xu,<sup>1,2</sup> Chenggang Gao,<sup>1</sup> Yajun He,<sup>1</sup> Xiangzhi Fang,<sup>1</sup> Deyi Sun,<sup>1</sup> Zhekang Peng,<sup>1</sup> Hairong Xiao,<sup>2</sup> Miaomiao Sun,<sup>1</sup> Pei Zhang,<sup>4</sup> Ting Zhou,<sup>1</sup> Xiaobo Yang,<sup>1</sup> Yuan Yu,<sup>1</sup> Ruiting Li,<sup>1</sup> Xiaojing Zou,<sup>1</sup> Huaqing Shu,<sup>1</sup> Yang Qiu,<sup>3</sup> Xi Zhou,<sup>3</sup> Shiyong Yuan,<sup>1,2</sup> Shanglong Yao,<sup>2</sup> and You Shang<sup>1,2</sup>

<sup>1</sup>Department of Critical Care Medicine, Union Hospital, Tongji Medical College, Huazhong University of Science and Technology, Wuhan 430022, China; <sup>2</sup>Institute of Anesthesiology and Critical Care Medicine, Union Hospital, Tongji Medical College, Huazhong University of Science and Technology, Wuhan 430022, China; <sup>3</sup>State Key Laboratory of Virology, Center for Biosafety Mega-Science, Chinese Academy of Sciences, Wuhan Institute of Virology, Wuhan 43007, China; <sup>4</sup>Department of Paediatrics, Jinling Hospital, School of Medicine, Nanjing University, Nanjing 210016, China

**Impairment of innate immune cell function and metabolism underlies immunosuppression in sepsis; however, a promising therapy to orchestrate this impairment is currently lacking. In this study, high levels of NOD-like receptor family CARD domain containing-3 (NLRC3) correlated with the glycolytic defects of monocytes/macrophages from septic patients and mice that developed immunosuppression. Myeloid-specific NLRC3 deletion improved macrophage glycolysis and sepsis-induced immunosuppression. Mechanistically, NLRC3 inhibits nuclear factor (NF)- $\kappa$ B p65 binding to nuclear factor of activated T cells 5 (NFAT5), which further controls the expression of glycolytic genes and proinflammatory cytokines of immunosuppressive macrophages. This is achieved by decreasing NF- $\kappa$ B activation—co-induced by TNF-receptor-associated factor 6 (TRAF6) or mammalian target of rapamycin (mTOR)—and decreasing transcriptional co-activator p300 activity by inducing NLRC3 sequestration of mTOR and p300. Genetic inhibition of NLRC3 disrupted the NLRC3-mTOR-p300 complex and enhanced NF- $\kappa$ B binding to the NFAT5 promoter in concert with p300. Furthermore, intrapulmonary delivery of recombinant adeno-associated virus harboring a macrophage-specific NLRC3 deletion vector significantly improved the defense of septic mice that developed immunosuppression upon secondary intratracheal bacterial challenge. Collectively, these findings indicate that NLRC3 mediates critical aspects of innate immunity that contribute to an immunocompromised state during sepsis and identify potential therapeutic targets.**

## INTRODUCTION

Sepsis is a dysregulated host immune response to disseminated infection characterized by an acute inflammatory response and a prolonged hyporesponsiveness or immunosuppression.<sup>1,2</sup> These infections are frequently encountered in the intensive care unit (ICU), accounting for 4%–17% of ICU admissions,<sup>3,4</sup> and are responsible for more than 8 million deaths worldwide each year,<sup>1</sup> with this form of

immunosuppression accounting for 85% of sepsis-related deaths.<sup>1</sup> In the setting of immunosuppression, deactivation of modulatory pathways has been considered an important cause of abnormal host response, which is characterized by reduced responsiveness of immune cells to pathogens<sup>5</sup> or monocyte human leukocyte antigen (HLA)-DR expression,<sup>5,6</sup> increased secondary bacterial infections, and an elevated risk of mortality after sepsis.<sup>5</sup> Thus, the current view in the field is that targeting sepsis-induced immunosuppression could be a cure for sepsis, but the challenge remains to identify appropriate targeted therapy.

Sepsis-induced monocyte/macrophage dysfunction is one of the manifestations of sepsis-induced immunosuppression.<sup>5,7,8</sup> During infection, the macrophage immune response is initiated when the pattern recognition receptors (PRRs) in the cell membrane of macrophages recognize microbial molecular patterns of external pathogens (pathogen-associated molecular patterns [PAMPs]). PAMPs recognition activates immediate innate host defense mechanisms and primes adaptive immune responses to protect the host from microbial infection.<sup>9</sup> However, prolonged exposure to PRR ligands such as lipopolysaccharide (LPS) affects the signal transduction inside the cell and induces an immunosuppressive state known as endotoxin tolerance.<sup>10</sup> The endotoxin tolerance of monocytes/macrophages contributes to the induction of whole-body immunosuppression because it recapitulates several key features of sepsis-induced immunosuppression.<sup>5,11</sup> Among these features, metabolic reprogramming plays an essential role in inducing and maintaining immune tolerance during sepsis.<sup>12</sup> Genome-wide transcriptome analysis of blood from patients with sepsis revealed that the metabolic shift to glycolysis was inhibited

Received 7 February 2022; accepted 30 August 2022;  
<https://doi.org/10.1016/j.ymthe.2022.08.023>.

**Correspondence:** You Shang, Department of Critical Care Medicine, Union Hospital, Tongji Medical College, Huazhong University of Science and Technology, Wuhan, China.

**E-mail:** [you\\_shang@hust.edu.cn](mailto:you_shang@hust.edu.cn)

upon microbial reinvasion, thereby underlying the immunosuppressive phase.<sup>12</sup> In an *in vitro* model that imitates sepsis-induced immunosuppression, metabolic defects in human monocytes were partially restored with interferon- $\gamma$  through enhancing the glycolysis.<sup>12</sup> Increased glycolysis has been postulated as a common feature of microbial ligand-activated macrophages, as it delivers energy to support antimicrobial responses.<sup>12–15</sup> These lines of evidence regarding the role of aerobic glycolysis in monocytes/macrophages offer new insight into biological therapies for sepsis-induced immunosuppression if targeting PRRs, but further studies are still needed.<sup>16–18</sup>

Most of the best-studied PRRs are receptors or sensors that drive innate immune responses to microbial ligands and subsequently initiate inflammatory signaling cascades; however, these PRRs can easily elicit disproportionate inflammation and severe tissue injury.<sup>19</sup> By contrast, a few PRRs in the myeloid lineage have a negative role in regulating innate immune responses, and deficiency of these molecules can strengthen the defensive capability of the host, but a promising therapeutic result has not yet been forthcoming.<sup>19–21</sup> NOD-like receptor (NLR) family CARD domain containing-3 (NLRC3) is a less studied novel negative cytoplasmic PRR that is expressed in various immune tissues and cells. As a sensor of microbial ligands, NLRC3 acts as a fine-tuning rheostat to T cell responses during viral infection, and deficiency of this receptor enhances protection against lymphocytic choriomeningitis virus and *Mycobacterium tuberculosis* infection.<sup>21,22</sup> NLRC3 is also a negative regulator of signaling pathways activated by Toll-like receptors (TLRs), and negatively regulates TLR4-dependent nuclear factor  $\kappa$ B (NF- $\kappa$ B) activation by binding tumor necrosis factor receptor-associated factor 6 (TRAF6) in activated immune cells.<sup>20,23</sup> During cancer development, TRAF6 sequesters NLRC3 and mammalian target of rapamycin (mTOR) to negatively regulate mTOR pathways.<sup>24,25</sup> mTOR pathway serves as a master regulator of cell metabolism, and its activation is highly dependent on the phosphorylation of mTOR. Activation of mTOR pathway can elicit the subsequent activation of numerous downstream targets, thereby regulating several transcription factors involved in the regulation of metabolic pathway genes, including glycolytic genes.<sup>12,21</sup> Additionally, mTOR can also interact with transcriptional co-activators such as p300 to control transcription and cell metabolism.<sup>26</sup> However, there is limited understanding of the mechanism underlying the regulation of NLRC3 on aerobic glycolysis, and whether NLRC3 inhibits the innate immune signaling to drive sepsis-induced immunosuppression has yet to be elucidated.

Here, we found that high NLRC3 expression correlates with the glycolytic defects of the monocyte/macrophage from septic patients and mice that developed immunosuppression. Genetic inhibition of myeloid-specific NLRC3 disrupts the NLRC3-mTOR-p300 complex and enhances NF- $\kappa$ B binding to the NFAT5 promoter in concert with the p300 to further improve the glycolysis of cells and sepsis-induced immunosuppression. Intrapulmonary delivery of recombinant adeno-associated virus (rAAV) harboring macrophage-specific NLRC3 deletion vector (rAAV-SP-NLRC3) significantly improved the defense of septic mice that developed immunosuppression upon

secondary intratracheal bacterial challenge, suggesting that NLRC3 may be a therapeutic target for sepsis-induced immunosuppression.

## RESULTS

### NLRC3 is upregulated in clinical immunotolerant monocytes and in macrophages that underwent sepsis-induced immunosuppression

NLRC3 is a negative innate sensor that guards against excessive acute inflammation in mouse models of sterile sepsis,<sup>20</sup> but its function in the host's defense response after undergoing sepsis-induced immunosuppression has not been fully characterized. We firstly measured NLRC3 expression in monocytes from 35 patients with bacterial sepsis (Figures 1A–1E). Monocytes from septic patients had significantly higher NLRC3 levels than those from control subjects (Figure 1E). The demographic and clinical characteristics of these subjects are listed in Table S1. Low HLA-DR expression and decreased levels of proinflammatory cytokines (e.g., tumor necrosis factor  $\alpha$  [TNF- $\alpha$ ]) in monocytes after sepsis are considered a hallmark of sepsis-induced immunosuppression.<sup>5,27</sup> These hallmarks were analyzed (Figures 1B–1D) and revealed an overall decrease in HLA-DR expression in monocytes from septic patients (Figures 1B and 1C), and the HLA-DR expression inversely correlated with induction of NLRC3 expression ( $r^2 = -0.5451$ ,  $p = 0.0007$ ; Figure 1F). Additionally, we observed significantly impaired production of TNF- $\alpha$  in monocytes challenged with LPS *in vitro* (Figure 1D), and the decreased TNF- $\alpha$  was inversely correlated with induction of NLRC3 expression ( $r^2 = -0.7132$ ,  $p < 0.0004$ ; Figure 1H). These findings suggest that NLRC3 elevation in monocytes is specifically correlated with induction of immunosuppression during sepsis.

To further explore the regulatory role of NLRC3 in sepsis-induced immunosuppression, as previously described,<sup>7,28–30</sup> we established a cecal ligation and puncture (CLP) model with impaired host immunity that most accurately resembles conditions in patients (Figures S1 and S2A). In this model, alveolar macrophages (AMs) and peritoneal macrophages (PMs) from mice after undergoing CLP had reduced expression of TNF- $\alpha$  in response to a subsequent LPS challenge *in vitro* (Figure S2C), which is analogous to what we observed with clinical monocyte tolerization, while the NLRC3 expression in AMs and PMs of sepsis-surviving mice increased 12 h after CLP and peaked at 48–72 h (Figure S3A). NLRC3-specific immunoblotting further confirmed upregulated NLRC3 protein expression in PMs 48 h after CLP (Figure S3B). These experiments suggest that NLRC3 expression in macrophages may have an important regulatory role in establishing immunosuppression in septic mice.

Sepsis-induced immunosuppression alters the host's immune response, leading to increased susceptibility of septic host to nosocomial pneumonia.<sup>7,28,30,31</sup> In the clinic cohort, we identified septic patients with culture-proven secondary infection ( $n = 19$ ). To confirm whether induction of NLRC3 expression in macrophages correlated with impairment of septic host defenses, the antimicrobial role at the infection site was evaluated. There was a decrease in the host's ability to clear the bacteria of the lungs and blood of CLP mice after *Pseudomonas aeruginosa*

infection (Figures S1C and S1D), and the septic mice challenged with a secondary infection of *P. aeruginosa* intratracheally (i.t.) ( $3 \times 10^9$  colony-forming units [CFU] mL<sup>-1</sup>) at 48 h displayed a significant increase in mortality compared with sham mice subjected to infection or CLP without undergoing infection (Figure S1B).

### NLRC3 depletion in myeloid cells alleviates sepsis-induced immunosuppression

To address the role of macrophage NLRC3 expression in orchestrating sepsis-induced immunosuppression, myeloid-specific NLRC3-deficient mice were generated by crossing NLRC3 floxed mice with LysM-Cre mice (Figures S4A and S4B). We confirmed that the *Nlrc3* gene was specifically deleted in bone marrow-derived macrophages (BMDMs), AMs, and PMs isolated from NLRC3-deficient LysM-Cre<sup>+</sup> NLRC3<sup>fl/fl</sup> (NLRC3<sup>ΔMac</sup>) mice but was unaffected in control LysM-Cre-NLRC3<sup>fl/fl</sup> mice (NLRC3<sup>WT</sup>) (Figures S4C and S4D). Myeloid cell population counts in the peritoneal cavities and spleens of NLRC3<sup>WT</sup> and NLRC3<sup>ΔMac</sup> mice were similar (Figures S5A and S5B), suggesting that NLRC3 deletion does not affect myeloid cell development or maturation. The mortality of NLRC3<sup>ΔMac</sup> mice was not significantly different from that of their wild-type (WT) counterparts 48 h after CLP (Figure 2B), but surviving septic NLRC3<sup>ΔMac</sup> mice had a significantly improved survival rate in response to secondary *P. aeruginosa* challenge at 48 h post CLP (Figure 2B). The bacterial burdens in the lungs and blood of NLRC3<sup>ΔMac</sup> mice undergoing CLP challenged with a secondary infection of *P. aeruginosa* were significantly lower than those in NLRC3<sup>WT</sup> mice (Figure 2C). The TNF- $\alpha$  and interleukin-6 (IL-6) levels in lung homogenates from septic NLRC3<sup>ΔMac</sup> mice were significantly higher than those of NLRC3<sup>WT</sup> mice, but IL-1 $\beta$  levels showed no difference (Figure 2D). Lung section staining showed that lung inflammation was exacerbated in NLRC3<sup>ΔMac</sup> mice at 24 h after the secondary *P. aeruginosa* challenge (Figures 2E and 2F).

To further evaluate the role of macrophage NLRC3 deficiency in mice subjected to CLP during secondary infection, we detected the expression of cytokines and cell-surface molecules in macrophages from septic mice with LPS stimulation *in vitro*. AMs and PMs from septic NLRC3<sup>ΔMac</sup> mice showed higher levels of TNF- $\alpha$  (Figures 1K and 1L) and IL-6 (Figures S6A–S6B) in response to LPS challenge *in vitro* than did macrophages from NLRC3<sup>WT</sup> septic mice. Moreover, monocytemacrophages in the lungs of septic mice also showed upregulation of CD86 and major histocompatibility complex class II (MHC II) expression relative to those from NLRC3<sup>WT</sup> mice (Figure 2I), although there were no significant differences in the overall numbers (Figure 2H). This evidence suggests that NLRC3 depletion in myeloid cells leads to stronger immune responses, alleviates sepsis-induced immunosuppression, and further confers protection against secondary pneumonia with *P. aeruginosa* in septic mice.

### NLRC3 depletion improves metabolic pathways in immunotolerant macrophages during sepsis

The increased immune response by macrophages to eliminate pathogens during the acute phase of infection is characterized by robust al-

terations in the expression of genes encoding inflammation and immunological effector mechanisms. To characterize the transcriptome alterations by which NLRC3 loss regulates pathogen infection, we performed RNA sequencing (RNA-seq) to identify the genes involved in NLRC3 regulation of microbial ligand stimulation in macrophages. We noted robust alterations in the BMDM transcriptome 12 h after LPS treatment, such as differential expression of genes encoding TNF- $\alpha$ , cytokine interaction receptors, TLRs, metabolic pathway signaling molecules (Figure 3A), and some genes encoding products involved in glycolytic enzyme (Figure 3B). We further validated changes in genes encoding glycolytic enzymes using quantitative PCR (qPCR) and found that several mRNAs including *Glut1*, *Hk2*, and *Ldha* were significantly upregulated in AMs and PMs of sham-surgery NLRC3<sup>ΔMac</sup> mice subjected to LPS challenge than did macrophages from NLRC3<sup>WT</sup> mice (Figures 3C, S10, S11A, and S12).

As a result of the functional reprogramming of macrophages during microbial ligand-induced immunosuppression, most inducing genes are transcriptionally silenced and not expressed upon restimulation;<sup>5,32,33</sup> broad cellular glycolytic metabolism defects in the monocytes of septic patients underlie the immunosuppressive phase. In determining whether the above changes could be identified in macrophages from sepsis-induced immunosuppression hosts subjected to secondary LPS stimulation, we found that the mRNA levels of *Glut1*, *Pfk*, *Hk2*, and *Ldha* were significantly upregulated in AMs (Figures 3C and S10) and PMs (Figures S11A and S12) from septic NLRC3<sup>ΔMac</sup> mice following *in vitro* LPS challenge compared with those from septic NLRC3<sup>WT</sup> mice. The enhanced transcription of glycolytic genes increases the capacity of cells to execute glycolysis. The gene transcription data were thus confirmed by lactate release, which is an inevitable product of glycolysis. Substantial increases in lactate production were detected in culture supernatants of macrophages from NLRC3<sup>ΔMac</sup> mice subjected to CLP (Figure 3D) and monocytes from septic patients with immunosuppression after LPS stimulation *in vitro* compared with those of control host (Figures S11D and S11E). These results demonstrate a shift toward aerobic glycolysis (known as the Warburg effect) and thus illustrate that induction of the Warburg effect in macrophages from septic hosts occurred in immunosuppression after NLRC3 depletion.

To broadly assess the ability of NLRC3 to inhibit glycolysis in macrophages in the setting of immunosuppression during sepsis, we generated an *in vitro* tolerance model using LPS. RAW 264.7 cells were transduced with recombinant lentivirus expressing a stable short hairpin RNA (shRNA) that targets the mRNA encoding NLRC3 (shNLRC3) or overexpressing a vector encoding NLRC3 (ovNLRC3) before being treated with LPS. We found substantially lower expression of NLRC3 in RAW 264.7 cells (Figure S14A), while NLRC3-overexpressing macrophages (Figure S14A) that encountered tolerance showed lower mRNA levels of *Glut1*, *Hk2*, *Pfk*, and *Ldha*, while shNLRC3 resulted in higher expression levels (Figure 3E) after secondary LPS challenge (Figure S13) and a substantial increase in lactate production in culture supernatants when tolerant BMDMs (Figure 3F) or RAW 264.7 cells (Figure S11B) with NLRC3 deficiency were restimulated with LPS. Extracellular

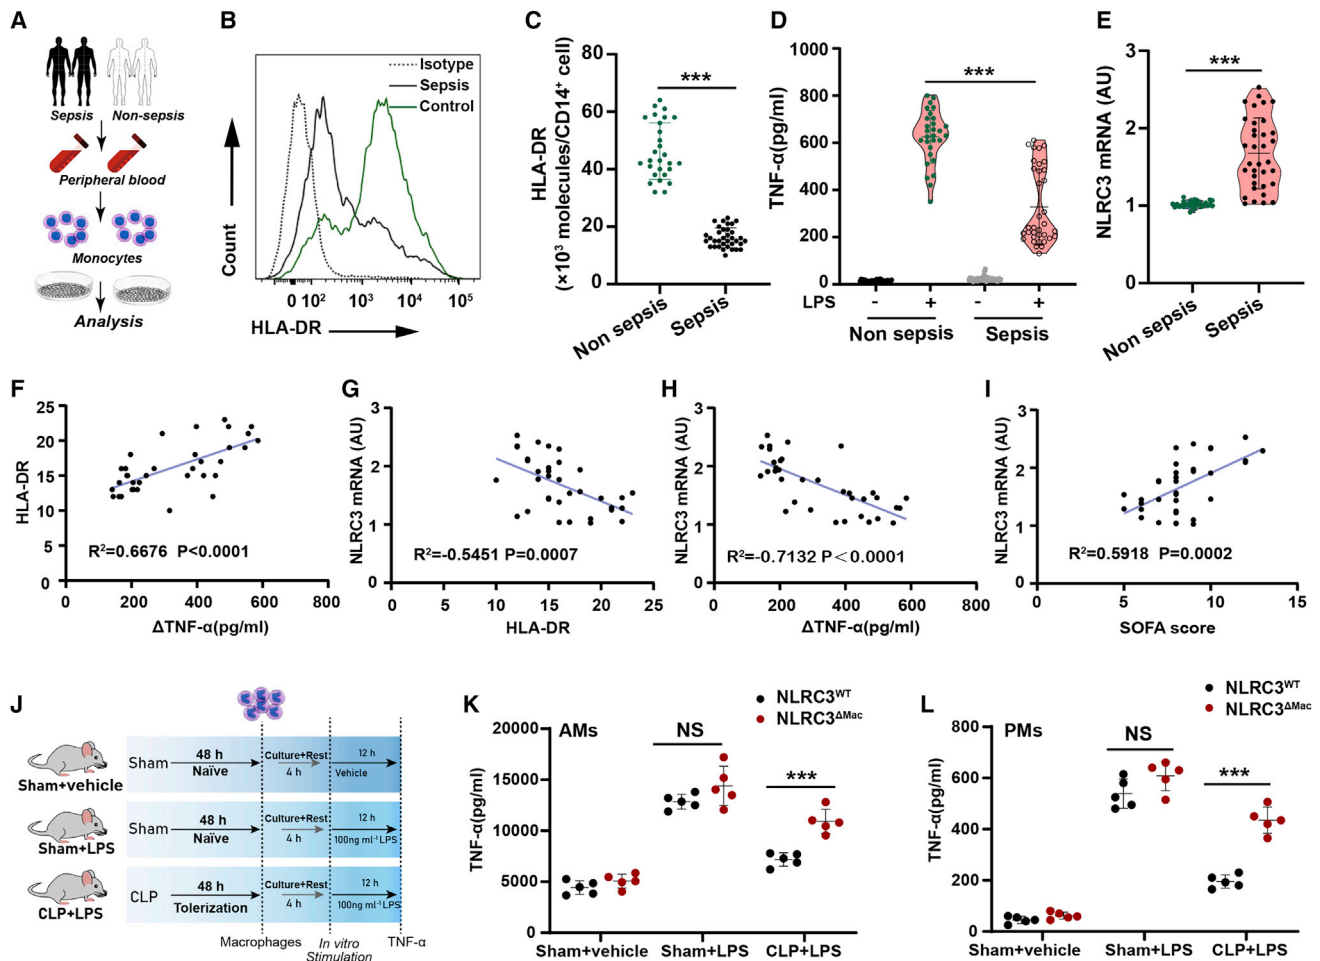

**Figure 1. NLRC3 is upregulated in clinical immunotolerant monocytes and macrophages that underwent post-CLP immunosuppression**

(A) Schematic overview of experimental design for (B) to (I). (B and C) Flow cytometry assessment of HLA-DR expression on circulating monocytes from septic patients ( $n = 35$ ) and non-septic donors ( $n = 29$ ). (D) ELISA for TNF- $\alpha$  in the culture supernatants from septic patients ( $n = 35$ ) and non-septic donor monocytes ( $n = 29$ ) stimulated with or without LPS (10 ng/mL) *in vitro* for 12 h (data are presented in a violin plot and were compared with a t test). (E) NLRC3 mRNA levels in monocytes of septic patients ( $n = 35$ ) and non-septic donors ( $n = 29$ ). (F) Correlation assay between HLA-DR levels and change in TNF- $\alpha$  production ( $\Delta$ TNF- $\alpha$ ) in monocytes of septic patients ( $n = 35$ ). (G–I) Correlation assay between NLRC3 levels and HLA-DR levels (G), and changes in TNF- $\alpha$  production ( $\Delta$ TNF- $\alpha$ ) in monocytes (H) and SOFA scores (I) of septic patients ( $n = 35$ ). (J) Treatment schematic for (K) and (L). (K and L) ELISA for TNF- $\alpha$  in the supernatants of NLRC3<sup>WT</sup> (LysM-Cre-NLRC3<sup>fl/fl</sup>) and NLRC3 <sup>$\Delta$ Mac</sup> (LysM-Cre<sup>+</sup> NLRC3<sup>fl/fl</sup>) mouse AMs (K) and PMs (L) stimulated with or without LPS *in vitro* ( $n = 5$ ).  $\Delta$ TNF- $\alpha$ : RPMI-stimulated samples versus LPS-stimulated samples. Circles represent individual participants. \* $p < 0.05$ ; \*\* $p < 0.01$ ; \*\*\* $p < 0.001$ ; NS, not significant (two-way ANOVA or Student's t test). See also Table S3 and Figures S1–S6.

acidification rate (ECAR) analysis can directly and continuously detect changes in aerobic glycolysis in living cells and reflect the glycolysis rate of the cells.<sup>34–36</sup> Consistent with endpoint assays such as lactate levels in supernatants, the basal ECARs, glycolytic reserve, and capacity were significantly elevated in immunotolerant macrophages with stable NLRC3 deficiency after 12 h of LPS stimulation (Figures 4G and 4H) compared with cells overexpressing NLRC3. These data suggest that NLRC3 depletion could alleviate the decrease in glycolytic activation in immunosuppressive macrophages.

To further confirm the role of glycolysis in host immune defense during sepsis-induced immunosuppression, we inoculated the glycolytic inhibitor 2-deoxyglucose (2-DG) into septic NLRC3 <sup>$\Delta$ Mac</sup> mice before

*P. aeruginosa* infection. Treatment of septic NLRC3 <sup>$\Delta$ Mac</sup> mice with 2-DG significantly increased mortality (Figure 3J) and bacterial loads in the lung and blood (Figure 3L) compared with the control group, indicating a direct role of macrophage glycolysis in NLRC3-driven sepsis-induced immunosuppression.

#### Immunometabolism by NLRC3 deficiency is not completely dependent on mTOR or TRAF6 signaling

We next explored the specific molecular pathways used by NLRC3 to orchestrate the glycolytic metabolism of macrophages in the setting of immunotolerance. Because mTOR is found to increase transcription of glycolytic enzymes, thereby enhancing the capacity of cells to execute glycolysis,<sup>12,21</sup> and given the finding that NLRC3 inhibits

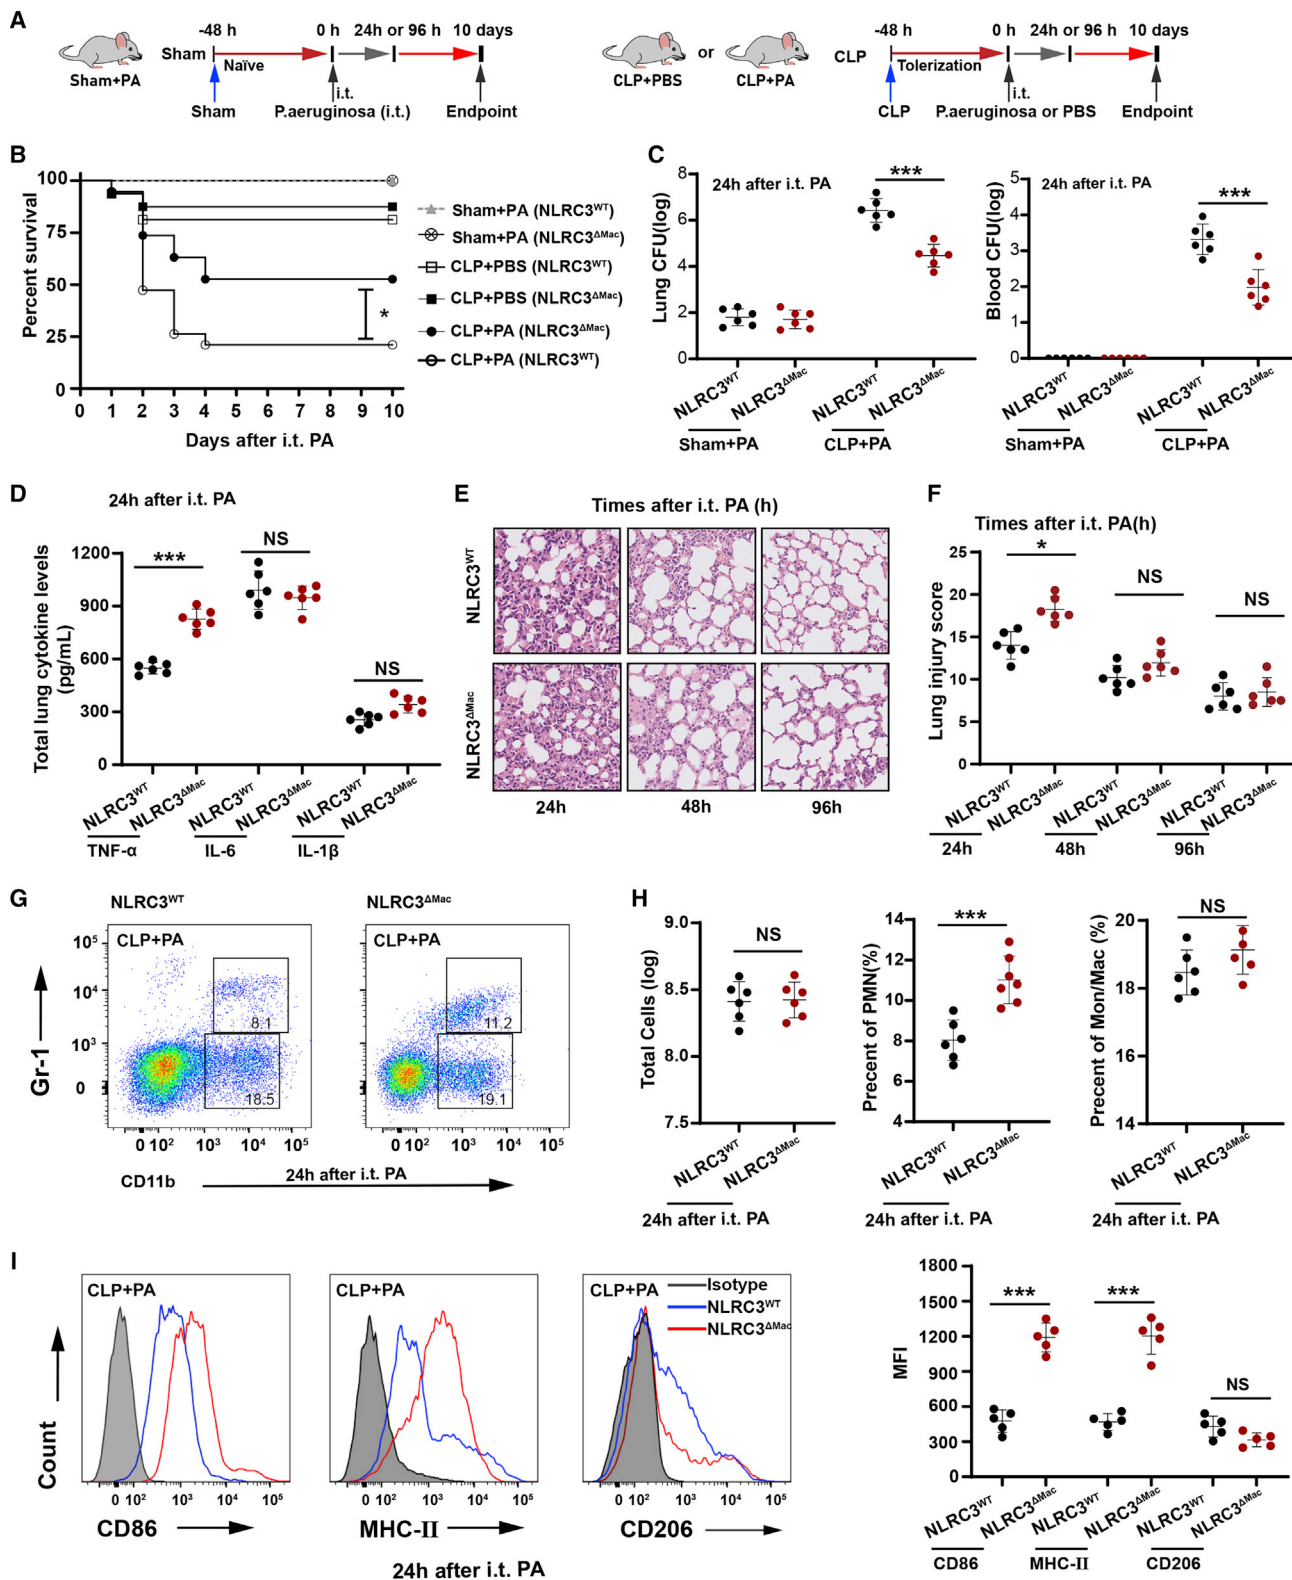

(legend on next page)

mTOR pathways in colon epithelial cells<sup>24,25</sup> and the gene transcription data (Figure S8), we assessed whether mTOR signaling highly depends on the phosphorylation of mTOR and the downstream effectors S6K and 4EBP1. We observed that shNLRC3 enhanced S6K and 4EBP1 phosphorylation of tolerant macrophages upon secondary LPS challenge, whereas macrophages with NLRC3 overexpression showed lower phosphorylation (Figure 4A). Moreover, freshly isolated PMs from NLRC3<sup>WT</sup> mice that had undergone CLP 48 h were stimulated with LPS *in vitro* and showed decreased phosphorylation of S6K and 4EBP1. Conversely, macrophages from septic NLRC3<sup>ΔMac</sup> mice showed enhanced phosphorylation of S6K and 4EBP1 (Figure 4B). Notably, the small-molecule active-site mTOR kinase inhibitor INK128<sup>37</sup> did not completely inhibit the ECARs or lactate and proinflammatory cytokine production of tolerant macrophages with NLRC3 loss upon secondary LPS challenge (Figures 4C and 4D). These lines of evidence suggest that mTOR activation may be involved in sensing the cellular energy status of tolerant macrophages with NLRC3 deficiency but is not the only molecule that activates the downstream immunometabolism.

TLR-NF-κB systems are involved in most key metabolic pathways involved in the Warburg effect in tumor cells.<sup>38,39</sup> Association of NLRC3 with TRAF6 leads to auto-ubiquitylation of the latter protein; this is a critical step in inhibiting TLR-dependent activation of NF-κB signaling.<sup>20,21</sup> We observed more rapid K63-linked ubiquitination of TRAF6 in tolerant macrophages with stable NLRC3 deficiency than in cells stably overexpressing NLRC3, and expression levels of TRAF6 and the downstream effector NF-κB were more abundant in the former cell population (Figure 4E). NF-κB activation was also enhanced in macrophages from septic NLRC3<sup>ΔMac</sup> mice compared with WT mice (Figure 4F), but the ECARs and lactate production were not completely inhibited by TRAF6 knockdown (Figure S14B) in tolerant macrophages with NLRC3 deficiency upon secondary LPS challenge (Figures 4G and 4H). These findings suggest that immunometabolic changes due to NLRC3 deficiency do not completely depend on the association between TRAF6 and NLRC3, but rather that co-activation of both TRAF6 and mTOR pathways is needed. Thus, inhibition of either TRAF6 or mTOR is insufficient to adequately inhibit the immunometabolic effects; inhibition of both is required.

#### NLRC3 deletion affects NF-κB-mediated immunometabolism without directly interacting with NF-κB subunits

As a point of cross-talk of the downstream effectors between TRAF6 and mTOR signaling pathways, NF-κB functional inhibition results

in impaired expression of the gene encoding the glycolytic enzyme and subsequent reduction of glycolysis in tumor cells.<sup>40</sup> We found that the NF-κB inhibitor BAY11-7082, which antagonizes I-κB kinase-β preventing nuclear translocation of NF-κB, abolished the induction of a glycolytic response and proinflammatory cytokine production by NLRC3 knockdown (Figures 4I–4K). These results suggest that the effect of NLRC3 on glycolysis may require NF-κB signaling and subsequent translocation.

The key subunits of NF-κB form a homo- or heterodimer with other NF-κB subunits to activate the target gene transcription involved as the endpoint in an array of signal transduction events.<sup>41</sup> To establish whether the p65 subunit transmitted these glycolytic metabolic effects, we used shRNA-mediated knockdown to inhibit them in NLRC3-deficient macrophages (Figure S14C). Loss of p65 or c-Rel could not completely reduce ECAR levels and lactate production of tolerant macrophages with NLRC3 deficiency upon secondary LPS challenge (Figure S15). These results suggest that the effect of NLRC3 on glycolysis may be independent of the forms of NF-κB dimer with its subunit and subsequent transduction in immunotolerant macrophages, and that another mechanism is required in the context of NF-κB-dependent glycolysis.

#### p300-Mediated NFAT5 signaling is required to activate NLRC3<sup>-/-</sup>-tolerant macrophage glycolysis

The effects of NLRC3 on signal transduction pathways in activated immune cells were orchestrated, whereby in addition to the NF-κB signaling the nuclear factor of activated T cell (NFAT) was also a major factor.<sup>23</sup> The NFAT family consists of five members, NFAT1 to NFAT5, which share a conserved DNA-binding domain that is structurally related to the NF-κB family members<sup>42,43</sup> and play a key role in the control of cytokine gene expression in T cells. We thus examined the expression levels of them in NLRC3<sup>-/-</sup> LPS-tolerant RAW264.7 macrophages (Figure S18B) and macrophages from septic NLRC3<sup>ΔMac</sup> mice (Figure S18C) upon LPS secondary challenge. Given that NFAT5 was most highly expressed (Figures S18A and S18B) and could regulate specific genes but also others that are inducible by NF-κB and NFAT1 to NFAT4,<sup>44</sup> and that the RNA-seq data from the NCBI Gene Expression Omnibus (GEO)<sup>45</sup> shows an enrichment of genes involved in glycolysis relevant to NFAT5 expression in BMDM macrophages with LPS stimulation (Figures 5A, S16, and S17), we thus focused on the NFAT5 isoform. PMs from NLRC3<sup>ΔMac</sup> mice that had undergone CLP 48 h and were stimulated with LPS *in vitro* showed a much stronger NFAT5 expression, and LPS-tolerant macrophages with NLRC3 deficiency showed

### Figure 2. NLRC3 depletion in myeloid cells alleviated sepsis-induced immunosuppression

(A) Schematic overview of experimental design for (B) to (I). (B) Kaplan-Meier survival curves. All mice were monitored for 10 days after secondary *P. aeruginosa* challenge (n = 16 mice/group). (C–F) Bacterial loads in the lung and blood (C), ELISA for TNF-α, IL-1β, and IL-6 in lung homogenate (D), histopathological images of lung tissues (E), and histological injury scores (F); samples were collected at 24, 48, or 96 h after the secondary infection. Scale bar represents 100 μm (n = 6 mice/group). (G–I) Percentages of lung-infiltrating cells that were neutrophils (CD11b<sup>+</sup> Gr-1<sup>+</sup>) or monocyte-macrophages (CD11b<sup>+</sup> Gr-1<sup>-</sup>) (G and H). Expression levels of CD86, MHC II, and CD206 were detected on monocyte-macrophages (CD11b<sup>+</sup> Gr-1<sup>-</sup>), with representative histogram with the corresponding median fluorescence intensity (MFI) (I). All samples were collected at 24 h after the infection challenge; assays were conducted by flow cytometry (n = 6 mice/group). Circles represent individual mice. \*p < 0.05; \*\*p < 0.01; \*\*\*p < 0.001; NS, not significant (two-way ANOVA or Student's t test and log-rank test for survival). See also Figures S4–S6.

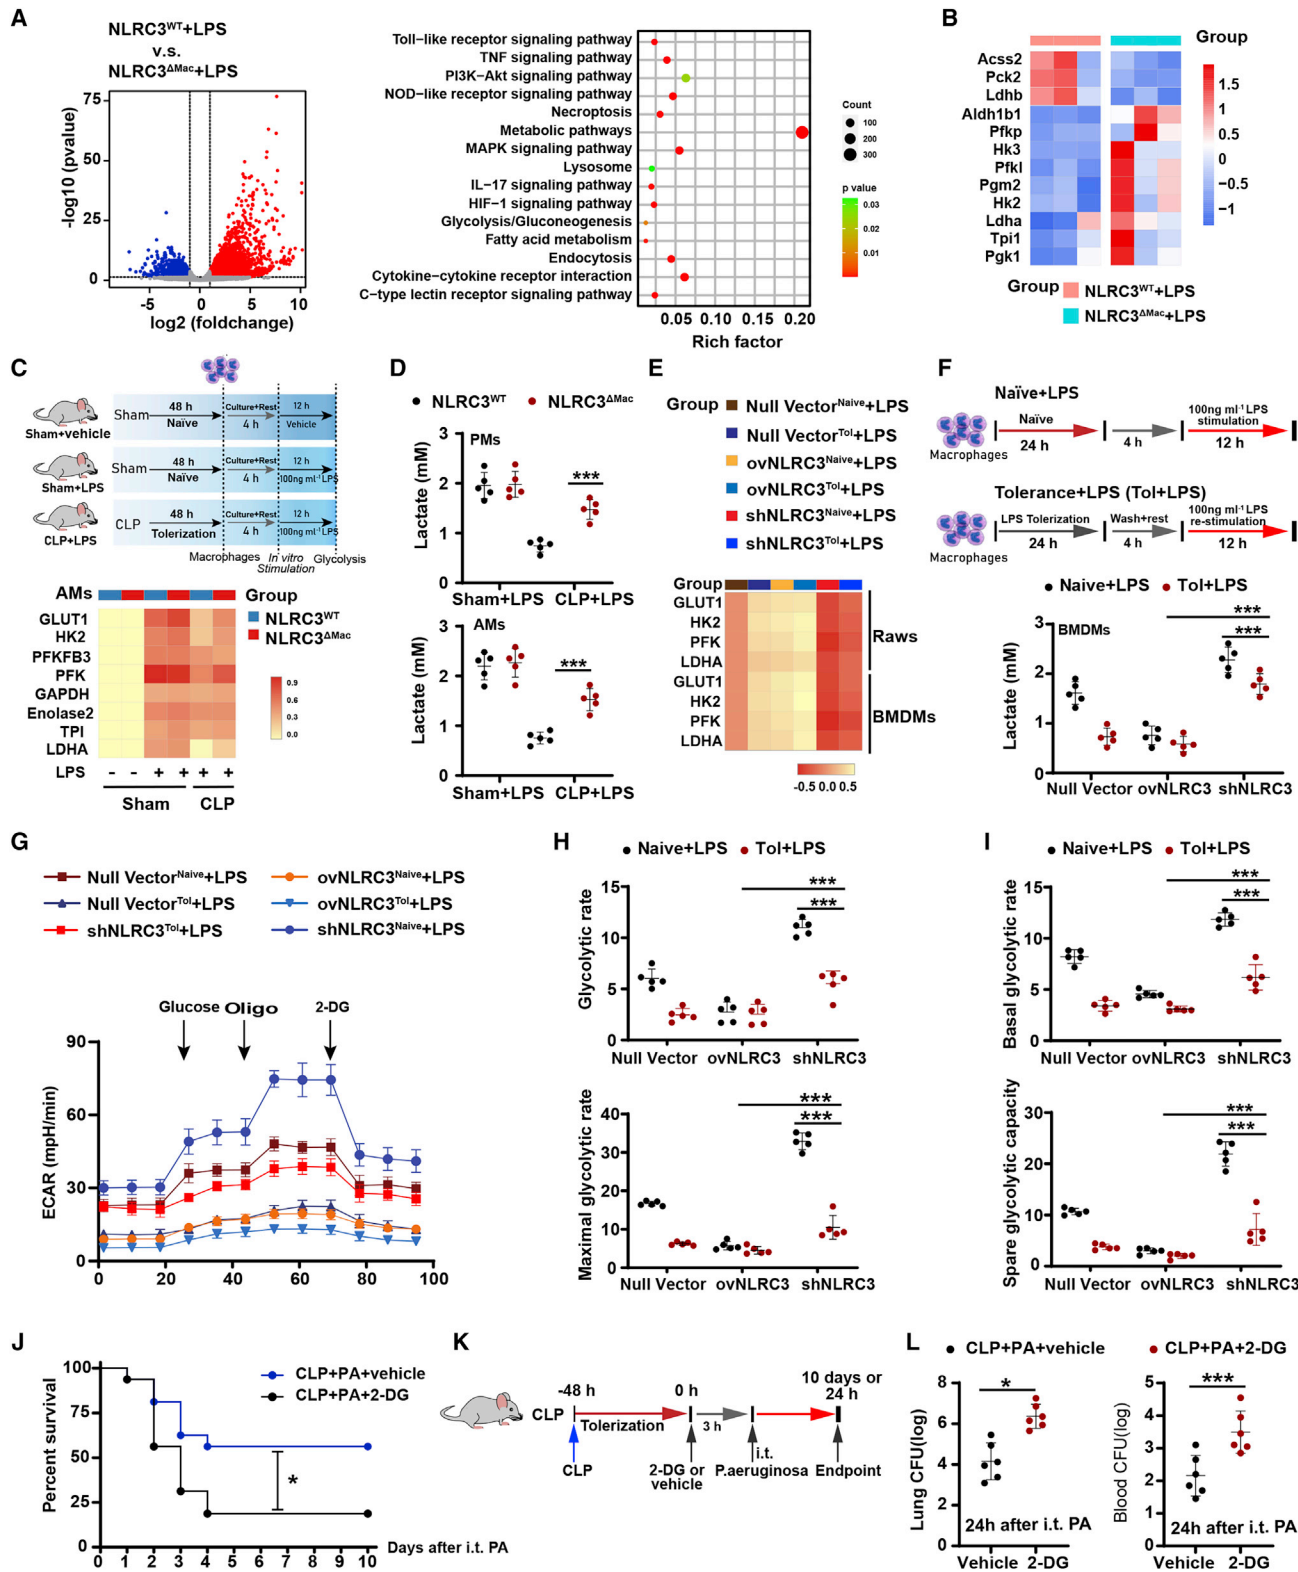

(legend on next page)

more enhanced NFAT5-dependent reporter activity than that of NLRC3-overexpression cells (Figures 5B and 5C). Furthermore, monocytes from septic patients with immunosuppression also had lower NFAT5 expression after LPS stimulation *in vitro* compared with those of control hosts (Figure S18D). These data suggest that NFAT5 activation plays a critical role in activating NLRC3<sup>-/-</sup>-tolerant macrophage glycolysis.

NF- $\kappa$ B binding to the NFAT5 promoter is one of the main mechanisms modulating NFAT5 function.<sup>46</sup> We found that NLRC3 deficiency markedly increased the affinity of NF- $\kappa$ B p65 binding to the NFAT5 promoter in LPS-tolerant macrophages upon LPS secondary challenge and validated the interaction between NF- $\kappa$ B and NF- $\kappa$ B consensus binding sites in the NFAT5 promoter region with chromatin immunoprecipitation (ChIP) assays (Figure 5D). We observed a similar increase in the activity of a reporter vector that includes the upstream site (base pairs -3,000 to +1) of NFAT5 that contains the NF- $\kappa$ B consensus sequences (Figure 5E). To better understand the role of NFAT5 in the effect of NLRC3 on glycolysis pathways, we inhibited NFAT5 with the specific inhibitor KR2 that blocks the interaction between NF- $\kappa$ B and its binding site in the regulatory region of the NFAT5 gene in response to secondary LPS stimulation. This treatment abolished the induction of a glycolytic response by TLR signaling activation and resulted in a significant decrease in ECARs and lactate production in activated immunotolerant NLRC3<sup>-/-</sup> macrophages in response to LPS secondary challenge (Figures 5F and 5G), with a similar decrease in TNF- $\alpha$ , IL-1 $\beta$ , and IL-6 (Figure 5G). These findings suggest that NF- $\kappa$ B binding to NFAT5 might be essential for NLRC3-deficient-mediated immunometabolism in tolerant macrophages in response to secondary LPS stimulation, but the mechanism by which NLRC3 deficiency enhances NF- $\kappa$ B binding to the NFAT5 promoter region is not completely understood.

NFAT5 connects DNA-bound NF- $\kappa$ B to the histone acetyltransferase p300 when p300 is activated and is critical for the target gene transcription after NF- $\kappa$ B nuclear translocation.<sup>47</sup> We thus examined intracellular p300 activity by measuring the acetylation of histone H3 and p300. The results showed that NLRC3 loss significantly increased the p300 activity of LPS-tolerant macrophages in response to secondary

LPS stimulation (Figure 5H). p300 is predominantly nuclear but can shuttle between the cytoplasm and nucleus,<sup>26,48</sup> and it can be activated to control cell metabolism through direct interaction with mTOR and subsequent mTOR-dependent phosphorylation.<sup>26</sup> During colorectal tumorigenesis, NLRC3 regulates mTOR signaling by directly associating with the protein and modulating mTOR phosphorylation.<sup>24,25</sup> One possibility is that NLRC3 loss disrupts the association with mTOR and p300, after which mTOR-mediated phosphorylation activates p300, thereby leading to subsequent NFAT5 activation. We overexpressed NLRC3, p300, and mTOR in 293T cells and performed co-immunoprecipitation experiments with p300, and observed that NLRC3, p300, and mTOR were in the same complex (Figure 5I). Consistent with this, INK128 reduced the p300 activity of tolerant macrophages with NLRC3 loss in response to secondary LPS challenge (Figure 5J). Similarly, after using the cerulenin to specifically disrupt the p65-NFAT5-p300 interaction, the NLRC3<sup>-/-</sup> LPS-tolerant macrophages following secondary LPS treatment exhibited a decrease in the co-precipitation of NFAT5 and p300 in p65 immunoprecipitation assays (Figure 5K), in the glycolytic activity, and in the level of TNF- $\alpha$ , IL-6, and IL-1 $\beta$  (Figure 5L). These results suggest that NLRC3 loss enhances p300 activity by directly disrupting the association between mTOR and p300, which increases NF- $\kappa$ B binding to NFAT5 after NF- $\kappa$ B translocation, and that the NF- $\kappa$ B-NFAT5 complex controls macrophage metabolism and then modulates sepsis progression.

### NLRC3 gene therapy targeting intrapulmonary macrophages improves sepsis-induced suppression of lung immune defenses

Although the benefit of NLRC3 knockdown in enhancing sepsis host immunity has been appreciated, NLRC3 has not yet been developed into a therapeutic target. rAAVs have emerged as attractive, highly versatile, gene delivery agents owing to their safe, stable, and transgene expression, and rAAVs have become the gene therapy vector of choice for human clinical trials.<sup>49</sup> To further assess whether NLRC3 knockdown could be used as a potential therapeutic intervention against secondary infection in a septic host experiencing immunosuppression, we used an AAV system (Figure 6A) harboring macrophage-specific synthetic promoter 146 with shRNA targeting NLRC3 (AAV-SP146-miR30-shNLRC3-eGFP, AAV-SP-shNLRC3) to deliver the gene delivery agents according to the experimental

### Figure 3. NLRC3 functions within macrophage to drive glycolysis defects during sepsis-induced immunosuppression

(A and B) Total RNA of each mouse was isolated from  $1.0 \times 10^6$  BMDMs ( $n = 3$  mice/each group) and analyzed by RNA-seq. (A) Left: scatterplot of the KEGG pathway enrichment analysis of the differentially expressed genes (DEGs) in immunometabolism-associated pathways. Right: the Rich factor is the ratio of DEG numbers annotated in this pathway term to all genes; the size of the symbols represents the number count of DEGs, and higher values indicate greater intensiveness; coloring of the p values indicates the significance of the Rich factor, ranging from -1 to 1. (B) Heatmap showing the relative amounts of RNA of the three pairwise comparisons. (C and E) qPCR detection of the mRNA expression levels of representative NLRC3-regulated genes involved in glycolysis in macrophages: (C) AMs with LPS *in vitro* challenge after CLP or sham operation ( $n = 5$  mice/each group), and (E) tolerant or naive RAW 264.7 with null vector, stable NLRC3 deficiency (shNLRC3), or overexpression (ovNLRC3) following LPS stimulation. The results of mRNA expression were normalized to  $\beta$ -actin, and  $\log_2$  values were used to calculate correlations. Each column in the heatmap represents the ratio of normalized expression ( $n = 5$ ). (D and F) Lactate production in AMs and PMs following LPS *in vitro* challenge in the indicated genotypes after CLP or sham operation (D) in tolerant or naive BMDMs transduced with shNLRC3 or ovNLRC3 following LPS stimulation (F). (G–I) Analysis of the extracellular acidification rate (ECAR) of tolerant or naive RAW 264.7 macrophages transduced with null or shNLRC3 or ovNLRC3 vector after LPS stimulation. ( $n = 5$ ). (J–L) Kaplan-Meier survival curves ( $n = 16$ ) (J); schematic overview of experimental design (K); bacterial loads in the lung (left) and blood (right) from surviving NLRC3<sup>ΔMac</sup> (LysM-Cre<sup>+</sup> NLRC3<sup>fl/fl</sup>) mice with either 2-DG or PBS after *P. aeruginosa* intratracheal administration (L). Circles represent individual mice. Graphs show the mean  $\pm$  SE of experimental replicates and are representative of at least three independent experiments. \* $p < 0.05$ ; \*\* $p < 0.01$ ; \*\*\* $p < 0.001$ ; NS, not significant (two-way ANOVA or Student's t test and log-rank test for survival). See also Figures S7–S13.



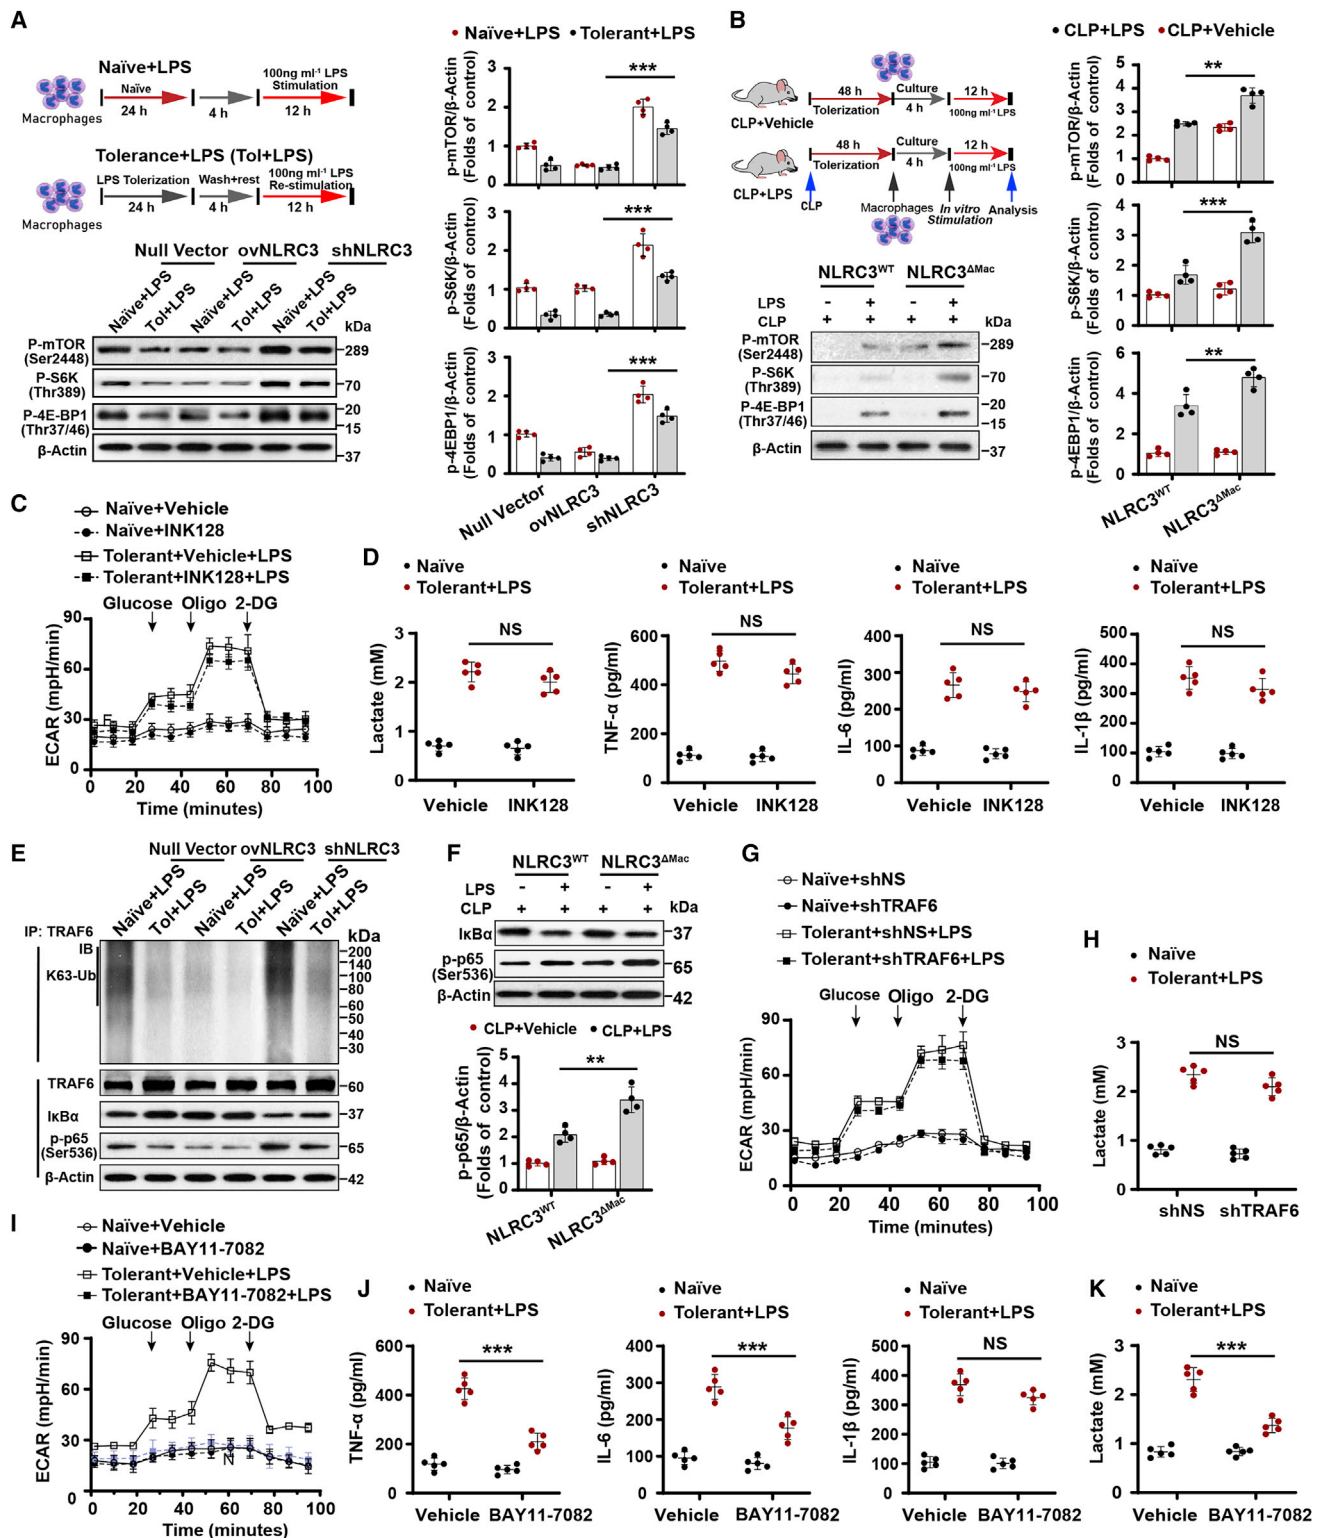

**Figure 4. mTOR or TRAF6 activation is only part of the mechanism by which NLRC3 regulates metabolic pathways in tolerant macrophages**

(A and B) (A) Schematic of treatments (upper), and immunoblot to detect phosphorylated mTOR, S6K, and 4EBP1 in tolerant or naive RAW 264.7 macrophages transduced with shNLRC3, ovNLRC3, or null vector (lower), and (B) in PMs with or without LPS *in vitro* challenge after CLP operation ( $n = 4$ ). (C and I) Seahorse XF<sup>®</sup> 24 monitored ECAR in

(legend continued on next page)

setup in Figure 6B. NLRC3 expression in AAV-infected mice was confirmed on day 28 after infection. As shown in Figures 6C and 6D, AAV-SP-shNLRC3 was successfully delivered and expressed in AMs and lung macrophages (LMs), and significantly decreased the expression of NLRC3 in macrophages from mice treated with AAV-SP-shNLRC3 compared with macrophages from the control mice, as well as in their lung epithelial cells (Figure 6E). As sepsis-induced immunosuppression is evidenced by the suppression of host antibacterial defense in the lung, we investigated the role of AAV-SP-shNLRC3 in host defense against secondary intrapulmonary *P. aeruginosa* challenge in septic mice. As previously observed in the NLRC3 knockout mice, treatment with AAV-SP-shNLRC3 in mice undergoing CLP had significantly increased survival rate following secondary pulmonary *P. aeruginosa* challenge compared with the control group (Figure 6F). Sham-operated mice infected with *Pseudomonas* had 100% survival in both the AAV-SP-shNLRC3 and AAV-Ctrl shRNA groups (Figure 6F). Similar to previous observations, lung and blood from AAV-SP-shNLRC3-infected mice undergoing CLP displayed a reduced bacterial load after secondary *P. aeruginosa* infection (Figure 6G) compared with AAV-Ctrl shRNA groups, and lung homogenates from AAV-SP-shNLRC3-infected mice had higher levels of TNF- $\alpha$  and IL-6 than those of control groups (Figure 6H). Collectively, these results suggest that AAV-SP-shNLRC3 confers protection against secondary challenge with *P. aeruginosa* in septic mice.

## DISCUSSION

Immunometabolic modulation is critical for orchestrating the host immune defense during sepsis-induced immunosuppression.<sup>12,15,17</sup> NLRC3 moderately mitigates CD4<sup>+</sup> T cell activation and exerts an immunosuppressive effect in response to viruses.<sup>21</sup> However, little is known about the regulatory role of NLRC3 in immunometabolism and innate immune defenses in the setting of sepsis. Our results demonstrate that NLRC3 expression in monocytes correlates with the immunosuppressive states of septic patients, and NLRC3 expression drives glycolytic defects of immunotolerant macrophages by inhibiting NF- $\kappa$ B p65 binding to NFAT5 after NF- $\kappa$ B translocation co-induced by both TRAF6 and mTOR in concert with mTOR-dependent p300 deactivation (Figure 7). Macrophage-specific deletion of NLRC3 could retune this pathway and protect a mouse model of sepsis by developing immunosuppression against secondary bacterial infection.

Septic patients who have undergone immunosuppression are more susceptible to secondary infections as a result of functional reprogramming of myeloid cells,<sup>5</sup> which is characterized by hyporesponsiveness and metabolic defects. Our findings reveal NLRC3 as an inducer of monocyte and macrophage hyporesponsiveness during sepsis, whereby monocytes and macrophages exhibit low TNF- $\alpha$  production and glycolysis; myeloid NLRC3-deletion mice were more resistant to secondary bacterial challenge, with strikingly lower lung and blood bacterial loads and an increased survival rate compared with WT mice. However, a previous study demonstrated that NLRC3<sup>-/-</sup> mice have enhanced responses, including proinflammatory cytokine release and greater body temperature, during LPS-induced sterile shock than WT mice.<sup>20</sup> Thus, it is unclear whether NLRC3 deficiency in macrophages will lead to uncontrolled tissue damage and a poor prognosis. In the present study, the mortality rate of septic NLRC3 <sup>$\Delta$ Mac</sup> mice 48 h after CLP was not strikingly different from that of their WT counterparts, and even splenic histopathology did not reveal significant differences. Although NLRC3 <sup>$\Delta$ Mac</sup> mice showed enhanced pulmonary inflammation as indicated by a higher histopathology score and a striking increase in cytokine levels (TNF- $\alpha$ , IL-1 $\beta$ , and IL-6), the pulmonary histopathology and inflammation gradually recovered after 2 days of secondary infection. Importantly, to avoid systemic adverse events as much as possible, we developed NLRC3 gene therapy targeting intrapulmonary macrophages, for which an AAV delivery strategy harboring a macrophage-specific promoter that restricts NLRC3 expression to the monocyte/macrophage lineage was designed to confer protection against secondary challenge with *P. aeruginosa* in septic mice.

Mechanistically, NLRC3 limits immune responses and the cellular glycolytic metabolism of immunotolerant macrophages during LPS rechallenge by suppressing NF- $\kappa$ B signaling. Previous studies revealed that NLRC3 reduced NF- $\kappa$ B activation in macrophages and T cells by attenuating K63-linked ubiquitination of TRAF6 in response to viruses,<sup>20,21</sup> but it is unclear whether NLRC3 drives immunotolerant macrophage hyporesponsiveness via the same mechanism. After tolerization, NLRC3<sup>-/-</sup> macrophages showed heightened polyubiquitination of TRAF6 and increased NF- $\kappa$ B activity upon LPS rechallenge. Preventing activation of TRAF6, an upstream mediator of NF- $\kappa$ B, did not significantly reduce NF- $\kappa$ B activity or glycolysis in NLRC3-deficient tolerant macrophages following LPS rechallenge, suggesting that TRAF6 activation may not be the only mechanism

---

tolerant RAW 264.7 with stable NLRC3 deficiency in the presence of mTOR inhibitor INK-128 (C) or NF- $\kappa$ B inhibitor BAY11-7082 (I) or vehicle after LPS restimulation; and in naive macrophages with stable NLRC3 deficiency in the presence of INK-128 (C) or NF- $\kappa$ B inhibitor BAY11-7082 (I) or vehicle with no LPS stimulation (n = 5). (D, J, and K) ELISA for lactate production, TNF- $\alpha$ , IL-6, and IL-1 $\beta$  in tolerant BMDMs of NLRC3 <sup>$\Delta$ Mac</sup> (LysM-Cre<sup>+</sup> NLRC3<sup>*fl/fl*</sup>) mice in the presence of INK-128 (D) or NF- $\kappa$ B inhibitor BAY11-7082 (J and K) or vehicle after LPS restimulation; and in naive macrophages of NLRC3 <sup>$\Delta$ Mac</sup> in the presence of INK-128 (D) or NF- $\kappa$ B inhibitor BAY11-7082 (J and K) or vehicle with no LPS stimulation (n = 5). (E) Immunoprecipitation of I $\kappa$ B and p65 and of TRAF6, I $\kappa$ B, and p65 from the tolerant or naive RAW 264.7 macrophages transduced with null or shNLRC3 or ovNLRC3 vector after 90-min LPS restimulation, followed by immunoblot to detect K63-linked ubiquitination (K63-Ub) of TRAF6. (F) Immunoblot of I $\kappa$ B, and p65 in PMs with or without LPS *in vitro* challenge after CLP operation (n = 4). (G) RAW 264.7 macrophages with stable NLRC3 deficiency were transfected with shTRAF6 or shNS (control) vector; Seahorse XF<sup>®</sup> 24 monitored ECAR in these tolerant cells following LPS stimulation or naive cells with no LPS stimulation (n = 5). (H) ELISA for lactate production in tolerant BMDMs of NLRC3 <sup>$\Delta$ Mac</sup> mice with shTRAF6 or shNS (control) vector after restimulation (n = 5), and in naive BMDMs of NLRC3 <sup>$\Delta$ Mac</sup> mice with shTRAF6 or shNS vector in the absence of LPS stimulation. Circles represent individual mice. Graphs show the mean  $\pm$  SE of experimental replicates and are representative of at least three independent experiments. \*p < 0.05; \*\*p < 0.01; \*\*\*p < 0.001; NS, not significant (two-way ANOVA or Student's t test). See also Figures S14 and S15.

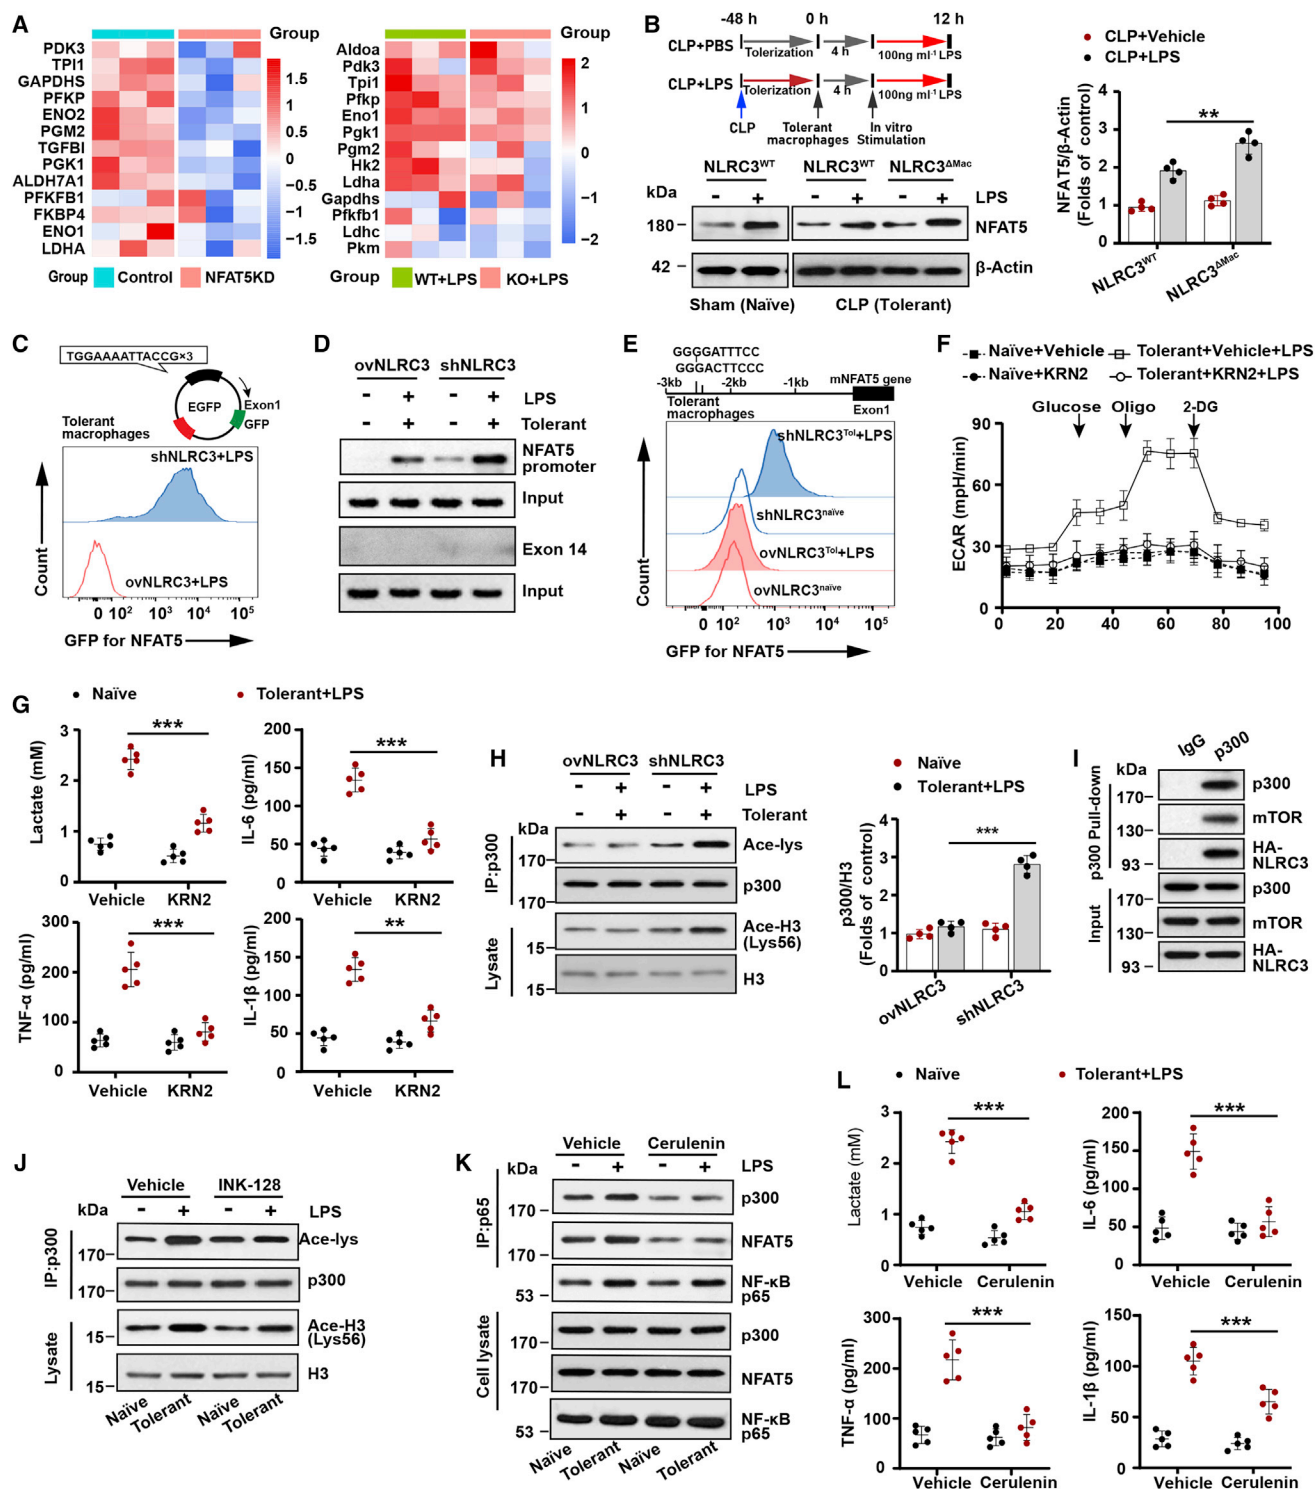

**Figure 5. p300-mediated NFAT5 signaling is required for activation of NLRC3<sup>-/-</sup>-tolerant macrophage glycolysis**

(A) The heatmap closely related to glycolysis is based on RNA-seq data comparing NFAT5 shRNA (NFAT5<sup>KD</sup>) and transduced empty vector (NFAT5<sup>Ctrl</sup>) RAW 264.7 (left), and NFAT5 KO BMDMs (NFAT5<sup>KO</sup>) and NFAT5 WT BMDMs (NFAT5<sup>WT</sup>) treated with LPS (right) from the NCBI GEO database.<sup>45</sup> Each column in the heatmap represents the ratio of normalized expression (n = 3). (B) Immunoblot to detect NFAT5 levels in PMs with or without LPS *in vitro* challenge after CLP or sham operation (n = 4). (C) Tolerant RAW 264.7 with stable NLRC3 deficiency (shNLRC3) or overexpression (ovNLRC3) were transfected with NFAT5 consensus sequences fused to a GFP reporter construct. Flow

(legend continued on next page)

that senses the immunometabolic status. mTOR is a central immunometabolic element in proinflammatory macrophages,<sup>50,51</sup> and the associations of NLRC3 with TRAF6 and mTOR can influence NLRC3 function in the regulation of mTOR activation in colon epithelial cells.<sup>24,25</sup> However, enhanced glycolytic activity and cytokine production by NLRC3 deficiency in immunotolerant macrophages were not restored after pharmacological inhibition of mTOR. These findings suggest that inhibition of mTOR or TRAF6 activation alone could not restore the enhanced immunometabolic response of immunotolerant macrophages induced by NLRC3 loss. Intriguingly, inhibiting NF- $\kappa$ B nuclear translocation, as a point of cross-talk of the downstream effectors linking TRAF6 and mTOR signaling, could reduce immunometabolic activity, suggesting that NLRC3 might impair the immune and metabolic processes in immunotolerant macrophages by inhibiting NF- $\kappa$ B translocation co-induced by mTOR and TRAF6 activation in the setting of immunosuppression during sepsis.

The mechanisms by which NF- $\kappa$ B regulates immune inflammatory responses in activated immune cells are well described,<sup>40</sup> but their role in the immunometabolism of NLRC3-deficient immune cells is less studied. NF- $\kappa$ B is a master transcription factor; when active, it exerts immunologic defense functions by binding to specific DNA sequences in target genes to modulate their transcription. However, knocking down key subunits of the NF- $\kappa$ B pathway did not markedly enhance glycolytic or inflammatory activity elicited by LPS challenge in tolerant NLRC3-deficient macrophages. Intriguingly, we identified an additional transcription factor, NFAT5, whose DNA-binding domain shares structural homology with NF- $\kappa$ B<sup>52</sup> and has two NF- $\kappa$ B consensus binding sites, as a key regulator of glycolytic activity. We also demonstrated that inducing NF- $\kappa$ B binding to the NFAT5 promoter is required for cell immune function in immunotolerant macrophages with NLRC3 deficiency following LPS challenge. Indeed, NFAT5 was also required to induce TNF- $\alpha$  and IL-6 gene expression in response to different stimulation thresholds, and it also controls glycolysis and MHC II expression of macrophages.<sup>45,53,54</sup> Our findings show that promoting NF- $\kappa$ B binding to NFAT5 in macrophages can modulate immune responses and the

glycolysis of immunotolerant macrophages with deficient NLRC3 expression. Levels of TNF- $\alpha$ , IL-6, and MHC II in lung tissue from NLRC3-deficient septic mice with immunosuppression were enhanced in response to secondary infection. The proglycolytic effect of NFAT5 in NLRC3-deficient immunotolerant macrophages was attenuated with NFAT5 inhibitors. These findings reveal a molecular mechanism for orchestrating immunometabolic activity associated with NFAT5-p65 function in immunotolerant macrophages with NLRC3 deficiency.

Nuclear NFAT5-p65-p300 complexes that connect DNA-bound NF- $\kappa$ B to the histone acetyltransferase p300 after p300 activation are critical for orchestrating NFAT5-p65 function.<sup>47</sup> Our results demonstrated that p300 activity is increased in LPS-NLRC3<sup>-/-</sup> tolerant macrophages compared with WT macrophages in response to secondary LPS stimulation. When the p65-NFAT5-p300 interaction was disrupted with a specific inhibitor, the glycolytic activity of LPS-NLRC3<sup>-/-</sup> tolerant macrophage was decreased. However, as a transcriptional co-activator with histone acetyltransferase activity, p300 is predominately localized in the nucleus;<sup>48</sup> how the cytoplasmic sensor NLRC3 modulates NFAT5-p65 remains poorly understood. NLRC3 deletion induces mTOR co-localization with lysosomes,<sup>25</sup> leading to auto-activation of mTOR, and lysosomal distribution of p300 with mTOR was also observed in HeLa cells.<sup>26</sup> Our co-immunoprecipitation analysis revealed that NLRC3, p300, and mTOR were in the same complex. After blocking mTOR activity with inhibitors, p300 activity of immunotolerant macrophages with NLRC3 loss was reduced upon secondary LPS challenge. When p300 was inhibited, the amount of p300 immunoprecipitated with p65 was dramatically lowered, suggesting that hypoacetylation of H3 by NLRC3 occurs when p300 binding is inhibited. These data show that the effects of NLRC3 occur when histone acetylation is prevented by inhibition of p300, thus leading to the inhibition of NF- $\kappa$ B-independent NFAT5. Activated p300 can acetylate cytoplasmic substrates or act as scaffold protein to shuttle proteins from the cytoplasm to the nucleus for gene transcription. This has been demonstrated in numerous biological processes<sup>26,48</sup> such as mTOR-mediated autophagy. We thus postulate that nucleocytoplasmic shuttling of p300

---

cytometry was performed to analyze NFAT5-dependent GFP expression (n = 3). (D, E, and H) (D) Tolerant macrophages were stably transfected with ovNLRC3 or shNLRC3 vector and restimulated with LPS, where macrophages (naive) transfected with ovNLRC3 or shNLRC3 vector without LPS served as the control groups; ChIP assays were conducted in these cells after 90-min secondary LPS stimulation, with exon14 used as a negative control (n = 3); (E) Flow cytometry monitored the GFP expression level in these macrophages following transfection with GFP reporter system containing two NF- $\kappa$ B binding sites upstream of NFAT5 gene (n = 3). (H) Immunoprecipitated p300 and lysate histone H3 were analyzed with anti-acetyl-lysine and anti-acetyl-histone H3 in these cells, respectively (n = 3). (F) Seahorse XF<sup>e</sup> 24 monitored ECAR in tolerant RAW 264.7 with stable NLRC3 deficiency in the presence of KR2 or vehicle after LPS restimulation, and in naive macrophages with stable NLRC3 deficiency in the presence of KR2 or vehicle without LPS stimulation (n = 5). (G and I) ELISA for lactate production and TNF- $\alpha$ , IL-6, and IL-1 $\beta$  in tolerant BMDMs of NLRC3<sup>ΔMac</sup> (LysM-Cre<sup>+</sup> NLRC3<sup>fl/fl</sup>) mice in the presence of KR2 (G) or cerulenin (I) or vehicle after undergoing LPS restimulation, and in naive macrophages of NLRC3<sup>ΔMac</sup> in the presence of KR2 (G) or cerulenin (I) or vehicle in the absence of LPS stimulation (n = 5). (I) Human embryonic kidney (HEK) 293T cells were transfected with the p300, HA-NLRC3, and mTOR plasmids. p300 immunoprecipitates were analyzed for p300, HA, and mTOR expression by immunoblot (n = 3). (J) Tolerant macrophages with stable NLRC3 deficiency treated with vehicle or INK-128 before LPS rechallenge (n = 3). Naive macrophages with stable NLRC3 deficiency without LPS treatment served as the control group. Immunoprecipitated p300 and lysate histone H3 were analyzed with anti-acetyl-lysine and anti-acetyl-histone H3, respectively. (K) Tolerant macrophages with stable NLRC3 deficiency were treated with vehicle or cerulenin before LPS rechallenge, with naive macrophages transfected with shNLRC3 without undergoing LPS treatment as the control group. Cell lysates were immunoprecipitated (IP) using anti-p65 antibody. The immunoprecipitates and cell lysates were immunoblotted for p300, NFAT5, and p65 (n = 3). Circles represent individual mice. Graphs show the mean  $\pm$  SE of experiment replicates and are representative of at least three independent experiments. \*p < 0.05; \*\*p < 0.01; \*\*\*p < 0.001; NS, not significant (two-way ANOVA or Student's t test). See also [Figures S16–S18](#).

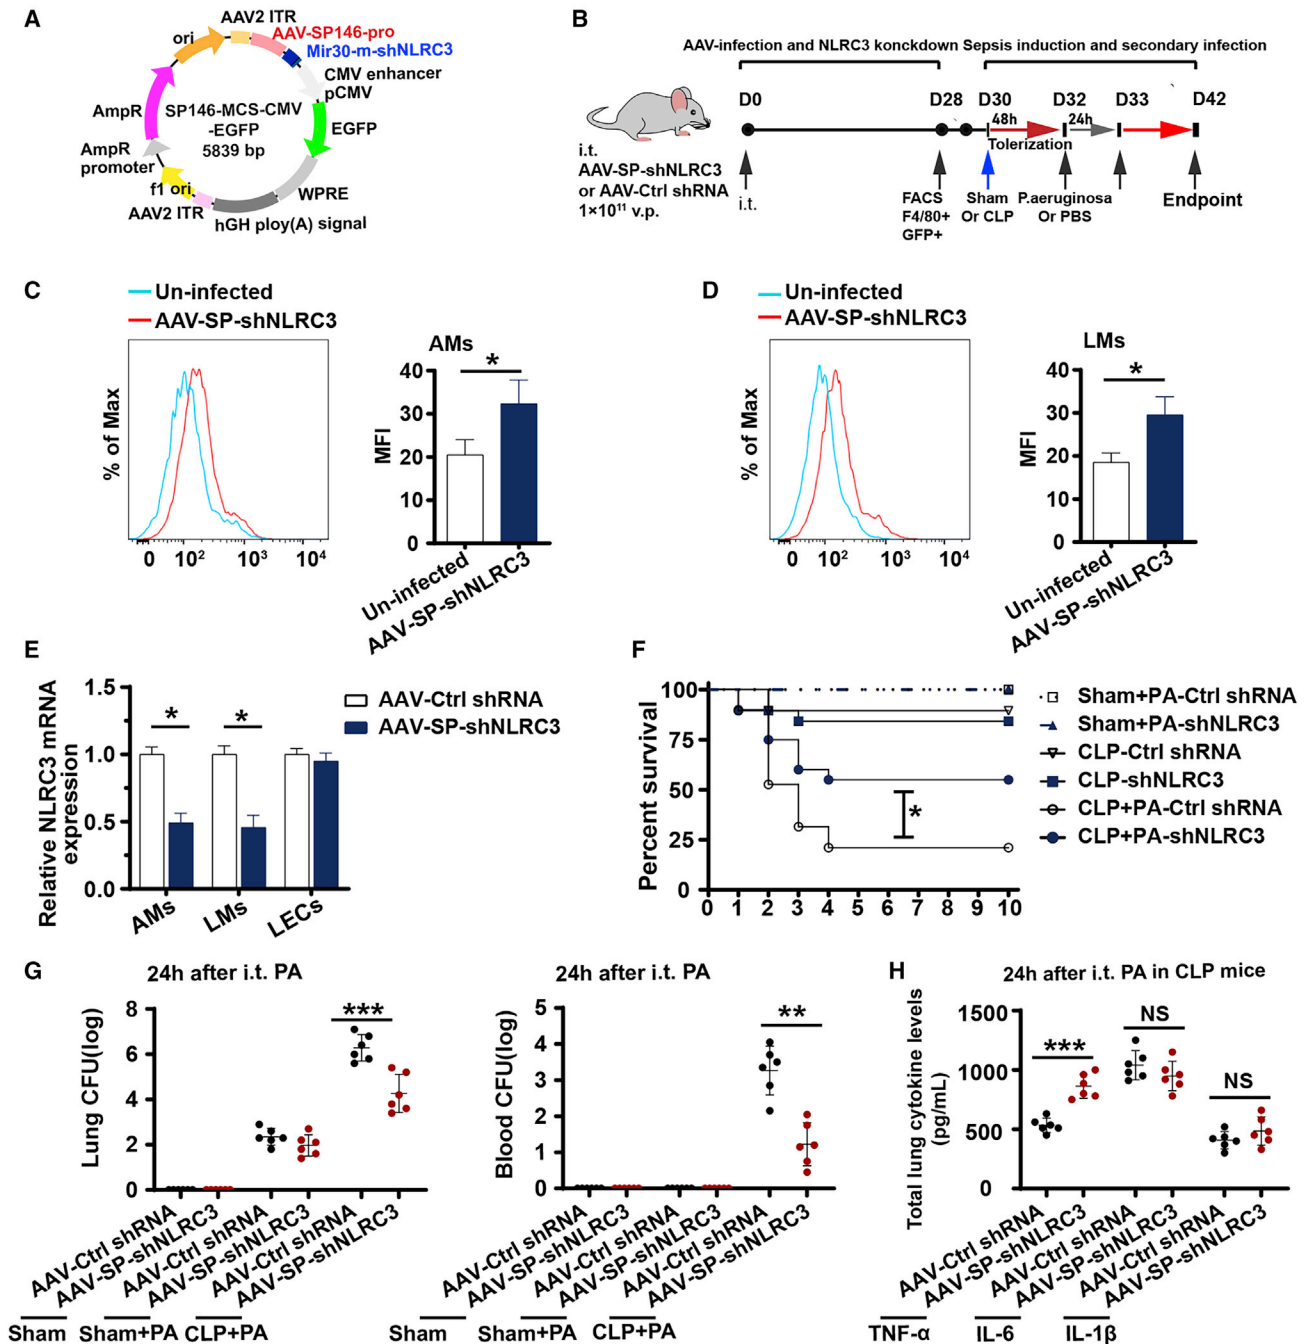

**Figure 6. NLRC3 gene therapy targeting intrapulmonary macrophages improves sepsis-induced suppression of lung immune defense**

(A) Full sequence map for AAV-SP146-miR30-shNLRC3-eGFP (AAV-SP-shNLRC3). (B) Schematic overview of experimental design for (C) to (H). Mice were administrated intratracheally with AAV-SP-shNLRC3 or AAV-Ctrl shRNA (nonsense control shRNA), and 28 days later were subjected to CLP or sham operation and secondary intrapulmonary *P. aeruginosa* infection. (C and D) Flow cytometric analysis of GFP expression in AMs from bronchoalveolar lavage fluid (C) and in lung macrophages (LMs) from homogenates (D) of uninfected and AAV-SP-shNLRC3-infected mice on day 28. (E) RT-PCR detected NLRC3 expression in AMs, LMs, and lung epithelial cells of AAV-SP-shNLRC3 or AAV-Ctrl shRNA-infected mice. (F–H) Surviving mice with AAV-SP-shNLRC3 or AAV-Ctrl shRNA were subjected to secondary intrapulmonary *P. aeruginosa* infection after CLP or sham operation: Kaplan-Meier survival curves ( $n = 19$  mice/group) (F), bacterial loads in the lung (left) and blood (right) (G), ELISA for TNF- $\alpha$ , IL-1 $\beta$ , and IL-6 in lung homogenate (H); survival curves were monitored for 10 days, and samples were collected after the secondary infection challenge. i.t., intratracheal. Circles represent individual mice. \* $p < 0.05$ ; \*\* $p < 0.01$ ; \*\*\* $p < 0.001$ ; NS, not significant (two-way ANOVA or Student's *t* test and log-rank test for survival).

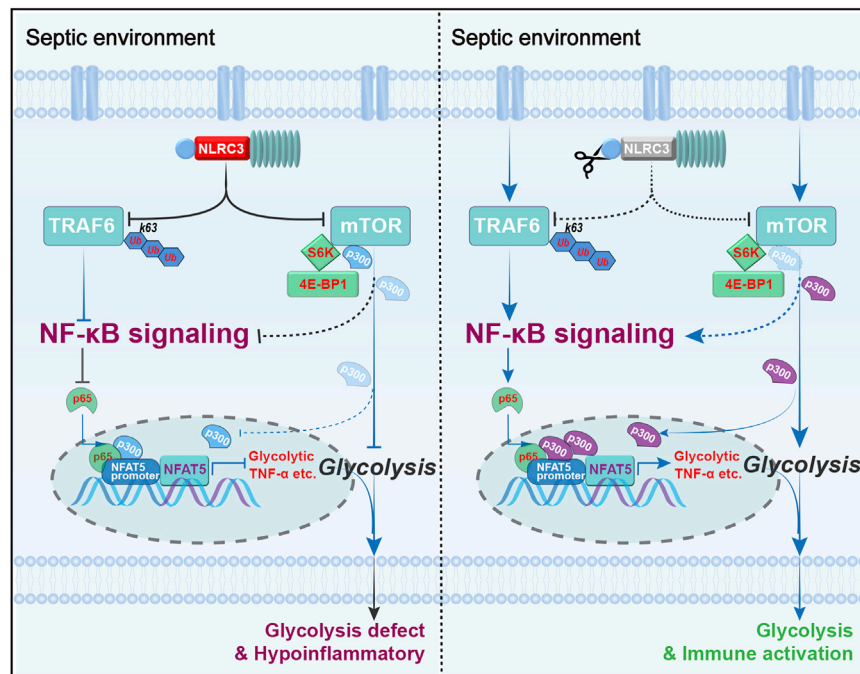

**Figure 7. Schematic model depicting how NLRC3 drives glycolytic defects and septic immunosuppression**

(Left) NLRC3 expression of immunosuppressive macrophages increases in the context of sepsis-induced immunosuppression. On one hand, increased NLRC3 inhibits NF- $\kappa$ B translocation co-induced by both TRAF6- and mTOR-dependent signaling. On the other hand, NLRC3 association with mTOR and p300 inhibits mTOR-mediated phosphorylation dependent on p300 activity. Finally, the p300 activity and the NF- $\kappa$ B binding to the NFAT5 promoter region was decreased, thereby preventing the NF- $\kappa$ B-NFAT5 complex from controlling the expression of genes encoding glycolytic enzymes and proinflammatory cytokines. (Right) Macrophage-specific NLRC3 deletion increases the p300 activity and further enhances NF- $\kappa$ B binding to the NFAT5 promoter region following NF- $\kappa$ B translocation, and thereby the enhanced NF- $\kappa$ B-NFAT5 complex elicits fine-tuning of proinflammatory cytokine production and glycolysis while the septic host achieves an enhanced protective immune response against secondary bacterial challenge.

may contribute to NFAT5-dependent recruitment of p300 in NLRC3-deficient immunotolerant macrophages. However, the exact mechanism by which NLRC3 modulates p300-NF- $\kappa$ B-NFAT5 signaling needs further investigation.

Although this study showed that NLRC3 deficiency improved lung host defense responses in an experimental model of sepsis-induced immunosuppression in response to acute secondary bacterial infection by regulating macrophage function, and was associated with improved survival in the septic host, it is premature to conclude that myeloid-specific NLRC3 loss is protective for all septic patients because this model primarily serves as a model of immunosuppression rather than a clinically relevant model of infection in critically ill septic patients. However, very few septic patients succumb to early death; the majority of critically ill patients survive sepsis and rapidly develop immunosuppression,<sup>55,56</sup> thus becoming susceptible to opportunistic secondary infections,<sup>2,31</sup> which are the primary cause of death among critically ill patients. The experimental model in the current study in which a secondary intratracheal bacterial challenge was conducted, at one level, simulates the pathophysiological process. More importantly, as high NLRC3 expression correlated with secondary infections in patients with sepsis, NLRC3 expression in monocytes or macrophages may be a reliable parameter to monitor susceptibility to secondary infections or perform sepsis stratification, although this merits future investigation. Also, NLRC3 gene therapy targeting intrapulmonary macrophages improved lung antibacterial host defense and prognosis in septic mice; for septic hosts with high NLRC3 expression in monocytes, targeting NLRC3 in specific cells

is likely to be a promising candidate therapy that orchestrates sepsis-induced immunosuppression.

In conclusion, we identified NLRC3 as a driver of monocyte and macrophage tolerance because its inhibition could improve immunometabolism in both cell types in the immunosuppressive period of sepsis. Loss of NLRC3 in macrophages intrinsically enhanced the protective immune response against secondary bacterial infection, in that NLRC3 deficiency activated cellular glycolytic pathways and cytokines by regulating NF- $\kappa$ B-independent NFAT5 signaling in an mTOR-dependent-on-p300 activation manner. Collectively, these results indicate that NLRC3 is a potential target for therapeutic interventions against secondary infection in polymicrobial sepsis.

## MATERIALS AND METHODS

### Mice

Six- to eight-week-old male C57BL/6 WT mice were obtained from Beijing HFK Bioscience (Beijing, China) and weighed between 20 and 25 g.

The *Nlrc3* conditional knockout mouse model (named as *Nlrc3*<sup>fl/+</sup> C57BL/6) was created by Beijing Biocytogen (Beijing, China). In brief, we employed a circular donor vector, and the *loxP* sites were introduced into introns 1 and 3. Cas9 mRNA, sgRNAs, and donor vector were mixed and co-injected into the cytoplasm of one-cell stage fertilized eggs (C57BL/6) to generate *Nlrc3*<sup>fl/+</sup> C57BL/6 chimeric mice that were mated with C57BL/6 mice to generate *Nlrc3*<sup>fl/+</sup> C57BL/6 mice. Southern blotting with two independent probes (3' probe [NcoI, WT 4.1 kb, targeted allele 2.8 kb] and LR probe [5' [NdeI, WT 5.7

kb, targeted allele 2.8 kb]) were used to identify correctly targeted *Nlrc3*<sup>fl/+</sup> C57BL/6 mice. F0 offspring were genotyped using two pairs of primers: L-GT-F1, L-GT-R1 and R-GT-F1, R-GT-R1 (Table S2).

Myeloid-cell-specific NLRC3 knockout mice were generated by crossing *NLRC3* floxed mice with *LysM-Cre* mice (#004781; The Jackson Laboratory, Bar Harbor, ME, USA). Male mice were used for experiments at 8–9 weeks of age. In all experiments, including BMDM studies, *NLRC3*<sup>WT</sup> littermates served as controls for *NLRC3*<sup>ΔMac</sup> mice. Mice were maintained under specific pathogen-free conditions and a 12:12-h light/dark cycle. They received food and water *ad libitum*.

### Patients and samples

Patients who were admitted to Union Hospital and fulfilled the clinical criteria for sepsis-3<sup>57</sup> were screened for eligibility. Sepsis-3 defines sepsis as life-threatening organ dysfunction caused by a dysregulated host response to infection. Organ dysfunction can be identified as an acute change in total Sequential Organ Failure Assessment (SOFA) score of 2 or more points due to the infection. Blood samples of septic patients were collected on days 1–2 of hospitalization. Exclusion criteria included pregnancy or breast feeding, age >80 or <18 years, malignancy, organ transplantation, human immunodeficiency virus/acquired immunodeficiency syndrome, autoimmune diseases, and immunosuppressive medication use during the last month. Age- and sex-matched volunteers without sepsis for elective surgery served as controls. Demographic information and clinical variables of patients, including age, sex, infection site, types of infection, SOFA score, length of hospital and ICU stay, and 28-day mortalities were retrieved from available medical records (Table S3). SOFA grades the function of six organ systems on a scale of 0–4 depending on the degree of dysfunction using objective measurements. The maximum SOFA scores were the highest (worst) scores within 24 h of sepsis diagnosis. Hospital-acquired infection was diagnosed if the patient had a positive culture of a new pathogen obtained from lower respiratory tract specimens (bacterial pneumonia), blood samples (bacteremia), or urine (urinary tract infection) collected ≥ 48 h after ICU admission.<sup>58</sup>

PBMCs were isolated by dilution of the blood in pyrogen-free PBS and density gradient centrifugation over Ficoll/Paque (catalog [cat.] #17-1440-03; GE Healthcare, Chicago, IL, USA). Cells were washed twice in PBS and resuspended in RPMI 1640 medium (cat. #12-167F; Invitrogen, Carlsbad, CA, USA) containing 10% (v/v) fetal bovine serum (FBS) (cat. #TMS-013-B; Millipore, Billerica, MA, USA), 10 mM L-glutamine, and 50 U/mL penicillin/streptomycin (cat. #15070-063; HyClone, Logan, UT, USA). Cells were counted in a Coulter counter (Coulter Electronics, Hialeah, FL, USA) and adjusted to  $5 \times 10^6$  cells/mL.

Monocytes were separated from other cells using the plastic adherence method.<sup>29</sup> Monocyte HLA-DR (cat. #307619; BioLegend, San Diego, CA, USA) expression was measured with flow cytometry. Moreover, monocytes were also stimulated with RPMI culture me-

dium containing *Escherichia coli* LPS (055: B5; 10 ng/mL; cat. # L6529; Sigma, St. Louis, MO, USA) for 12 h in the presence of 10% serum, and supernatants were stored at  $-80^{\circ}\text{C}$  until cytokine and lactate measurements were performed.

We identified septic patients in an immunosuppression phase as indicated by low HLA-DR expression on monocytes (<30%) and low TNF- $\alpha$  levels in supernatants. A total of 35 septic patients met the above conditions. Detailed clinical information is presented in Table S3.

### Cell preparation

Murine AMs and PMs were harvested by lavage as previously described.<sup>59</sup> Cells were resuspended in RPMI 1640 containing 2 mM L-glutamine, 1% penicillin/streptomycin, and 10% FBS, and cultured for 2 h. Cells were washed with RPMI 1640 to remove non-adherent cells; only adherent monolayer cells were used.

BMDMs from the indicated mice femurs and tibias were obtained using 30 ng/mL recombinant macrophage colony stimulating factor (cat. # 315-02; PeproTech, Rocky Hill, NJ, USA) as described previously.<sup>60</sup> Adherent BMDMs were detached on day 6 and replated in multiwell plates for analysis.

RAW 264.7 (TIB-71) cells were purchased from the American Type Culture Collection (ATCC) (Manassas, VA, USA). Before use, mycoplasma contamination was negative for all cells. *NLRC3* stably overexpressing (ov*NLRC3*) and knockdown RAW 264.7 cells (sh*NLRC3*) were selected using 8  $\mu\text{g}/\text{mL}$  polybrene (cat. # H9268; Sigma) as described previously.<sup>61</sup> The lentiviral vectors harboring sh*NLRC3*, sh*TRAF6*, p65, c-Rel, or overexpressing a vector encoding *NLRC3* were constructed by Genechem (Shanghai, China), and were used to infect the RAW 264.7 cells or BMDMs as described by the manufacturer. These cells were grown in RPMI 1640 or Dulbecco's minimum essential medium (DMEM) supplemented with 10% heat-inactivated FBS and 1% penicillin/streptomycin at  $37^{\circ}\text{C}$ , 95% humidity, and 5%  $\text{CO}_2$ . HEK293 cells (ATCC #3216) were also cultured in DMEM with 10% FBS at  $37^{\circ}\text{C}$  under 5%  $\text{CO}_2$ .

For primary AM or PM stimulation *in vitro*, 100 ng/mL LPS was added for the indicated time. To induce immune tolerance, RAW 264.7 cells or BMDMs were preincubated with 100 ng/mL LPS. After 24 h, cells were washed with PBS, cultured in medium (2 h), and re-challenged with 100 ng/mL LPS for the desired amount of time. In such experiments, unstimulated (naive) BMDMs or RAW 264.7 were incubated in the medium. After 24 h, cells were washed and challenged with 100 ng/mL LPS to produce responsive cell controls. Pharmacological inhibition of mTOR (300 nmol/L; INK128, cat. #S281104; Selleck Chemicals, Houston, TX, USA), inhibition of NF- $\kappa\text{B}$  (300  $\mu\text{M}$ ; BAY 11-7082, cat. #S2913; Selleck Chemicals), disruption of NFAT5-p65-p300 interaction (10  $\mu\text{M}$ ; cerulenin, cat. # C2389; Sigma), and inhibition of NFAT5 (0.8  $\mu\text{M}$ , KRN2, cat. #248260-75-5; Sigma) were achieved by pretreating cells with inhibitors for 1 h before LPS activation unless otherwise indicated.<sup>10,21</sup>

### Bacterial strains and culturing conditions

*P. aeruginosa* (ATCC #27853) was obtained as previously described.<sup>7,8,28,62</sup> In brief, *P. aeruginosa* was incubated overnight in Luria-Bertani medium at 37°C with constant shaking (100 cycles min<sup>-1</sup>). Bacteria were washed and diluted in PBS. The concentration of bacteria was determined by reading the optical density (OD) at 600 nm and then plotting the OD on a reference curve verified by quantitative culture of the inoculum. The bacteria were then diluted to the desired concentration.

### Polymicrobial sepsis model and secondary infection

For polymicrobial sepsis induction, the CLP model was performed as previously described.<sup>29,30,60</sup> In brief, male C57BL/6 mice ranging from 22 to 28 g (8–10 weeks old) or littermates of the same sex *NLRC3<sup>fl/fl</sup> LysM-cre<sup>-</sup>* (*NLRC3<sup>WT</sup>*) and *NLRC3<sup>fl/fl</sup> LysM-cre<sup>+</sup>* (*NLRC3<sup>ΔMac</sup>*) mice matched by age and body weight underwent CLP. Approximately 50% of the cecum was ligated and punctured twice with a 20-gauge needle to induce severe sepsis. Saline (1 mL) was injected subcutaneously for resuscitation immediately after closing the abdomen. A broad-spectrum carbapenem antibiotic (imipenem-cilastatin, 25 mg/kg; Merck, Kenilworth, NJ, USA) was given beginning 6 h after CLP and then every 12 h for the first 4 days.<sup>63</sup> Sham-treated mice received the same operation without puncture.

For the secondary infection model, sepsis-surviving mice were anesthetized and infected with 20 μL ( $3 \times 10^9$  CFU mL<sup>-1</sup>) of *P. aeruginosa* intratracheally (i.t.) on day 2 after CLP as described previously.<sup>29,30</sup> Control mice were administered with 20 μL of PBS i.t. Mice were monitored for 10 days or sacrificed 6–120 h after CLP and 12–96 h after i.t. challenge to collect serum or tissue.

### AM and PM stimulation

Adherent AMs and PMs from CLP and sham mice were stimulated *ex vivo* with or without 100 ng/mL LPS (cat. # L6529; Sigma) at 37°C and 5% CO<sub>2</sub> for indicated times. Cell lysates and supernatants were harvested for mRNA expression or ELISAs and measurement of lactate levels.

### qPCR

Total RNA was extracted from macrophages using TRIzol reagent as previously described.<sup>64</sup> cDNA synthesis was performed using PrimeScript RT reagent kit with gDNA eraser (RR047B; TaKaRa, Kusatsu, Japan). qPCR was run using SYBR Premix Ex Taq II Assay (RR820A; TaKaRa) on a C1000 Thermal Cycler (Bio-Rad Laboratories, Hercules, CA, USA). The primers are presented in Table S2. Target gene expression was normalized to β-actin, and fold changes were calculated via the 2<sup>-ΔΔCt</sup> method.

### Histological assays

Mice were sacrificed at the indicated time points. After cardiac perfusion with PBS, the left upper of lung and spleen tissues were obtained, fixed in 4% paraformaldehyde overnight, and embedded in paraffin, and 4-μm sections were cut and stained with hematoxylin and eosin. The slides were imaged using a microscope. Lung injury was scored

by a blinded investigator from 0 (absent) to 4 (severe) with the following parameters: necrosis or formation of abscess, interstitial inflammation, endothelialitis, bronchitis, edema, thrombi, pleuritis, and percentage of the lung surface demonstrating confluent (diffuse) inflammatory infiltrate, as previously described.<sup>65</sup>

### Total lung leukocyte preparation

Whole-lung samples were harvested from euthanized mice and collagenase digested as previously described.<sup>7</sup> The digestion buffer was prepared with RPMI, 10% fetal calf serum, 1 mg/mL collagenase (Roche, Basel, Switzerland), and 30 mg/mL DNase (Sigma-Aldrich), and the lung slurries were enzymatically digested for 30 min at 37°C. Samples were then centrifuged through a 40% Percoll gradient to enrich for leukocytes. Viable cells were counted on a hemocytometer by trypan blue exclusion and then cultured in RPMI, followed by flow cytometry (as described below).

### Bacterial counts

Bacterial loads in lung and blood were determined as previously described.<sup>7,66</sup> In brief, lungs were harvested after pulmonary vasculature perfusion with PBS containing 5 mM EDTA and then homogenized for 1 min with a homogenizer (Ultra-Turrax T25; Ika, Staufen, Germany) in 1 mL of sterile saline. Homogenates were then serially diluted 1:5 in PBS. Blood was collected from the right ventricle with a heparinized syringe at 24 h after *P. aeruginosa* challenge, then serially diluted 1:2 with PBS, after which 10 μL of each dilution was plated on blood agar to determine lung and blood CFU.

### ELISA

The concentrations of TNF-α (cat. #500850; Cayman Chemical, Ann Arbor, MI, USA), IL-6 (cat. # 583371; Cayman Chemical), and IL-1β (cat. # EMC001b; Neobioscience, Beijing, China) in mouse serum, cell culture supernatants, and lung homogenates were determined by ELISA according to the manufacturer's instructions. The lung tissues (right lobes) were obtained and homogenized in 2 mL of PBS with 0.05% Tween 80, and homogenized supernatants were filtered (0.22-μm pore size).

### Metabolism assays

Lactate levels in the supernatants were measured using a Lactate Assay Kit (cat. #700510; Cayman Chemicals) according to the manufacturer's instructions. In brief, the supernatants were collected and deproteinated, and neutralized acid was used to remove any precipitated salts. The reaction mix was added to the samples, and the average fluorescence of each sample was measured on a microplate reader (OD 570 nm) to calculate the lactate concentration.

ECARs were measured with a Seahorse XF<sup>c</sup>24 Extracellular Flux Analyzer (Agilent Technologies, Santa Clara, CA, USA) as previously described.<sup>34</sup> In brief, macrophages were seeded into XF-24 cell culture microplates ( $2 \times 10^5$  cells/well in 200 μL, cat. #102342-100) and then stimulated with LPS with or without the inhibitors (BAY 11-7082 or INK128 or KR2) for the indicated time. The cells were washed with XF Running Buffer and then placed at 37°C for 1 h in the absence of



CO<sub>2</sub>. Glycolysis was measured with the XF Glycolysis Stress Test Kit (cat. #103020-100; Agilent Technologies) according to the manufacturer's instructions, and the macrophages were measured over time and exposed to glucose, oligomycin, and 2-DG for ECAR measurement at the indicated time points. ECARs were recorded three times for each condition. The basal ECAR, glycolysis (ECAR after glucose addition), glycolytic capacity (maximal ECAR after subtracting the ECAR following 2-DG exposure), and glycolytic reserve (difference between oligomycin-induced maximal ECAR and glucose-induced glycolytic flux) were calculated.

### Flow cytometry

Single-cell suspensions of lung tissue, spleen tissue, and peritoneal cavity were harvested as previously described<sup>8,29</sup> and washed in ice-cold PBS containing 1% FBS. Cells were preincubated with anti-FcγRII/FcγRIII antibodies (cat. #101320; BioLegend) and fixable viability dye eFluor 780 (cat. #565388; BD Biosciences, Franklin Lakes, NJ, USA) in DMEM with 2% FBS for 15 min at 4°C, then stained with fluorescently labeled antibodies for 30 min at 4°C. The cells were fixed and permeabilized with the IC Staining Buffer Kit (cat. #00-5523-00; eBioscience, Hatfield, UK) for intracellular transcription factor before antibody labeling. Stained cells were washed twice with 2 mL of fluorescence-activated cell sorting buffer (Dulbecco's PBS containing 1% FBS and 2 mM EDTA). Flow cytometry antibodies and other reagents are listed in Table S4. Flow cytometry data were acquired on a FACSDiva flow cytometer (BD Biosciences) and further analyzed with FlowJo software (Tree Star, Ashland, OR, USA).

### Ubiquitination assay

Ubiquitination experiments were performed as described previously.<sup>21,35,67</sup> In brief, cells were lysed with 1% SDS isotonic buffer, and lysed cell samples were boiled at 95°C for 15 min to remove any noncovalent interactions. Lysates were cleared by centrifugation (15,000 × g, 4°C, 15 min) and diluted with 1% Triton X-100 buffer. Lysates were immunoprecipitated with anti-TRAF6 antibody (cat. #sc-8409; Santa Cruz Biotechnology, Dallas, TX, USA), incubated overnight at 4°C with gentle shaking, after which protein G agarose beads (cat. #9863; Cell Signaling Technology, Danvers, MA, USA) were added, and incubation was continued for another 4 h at 4°C. The beads were washed and resuspended in sample buffer. Immunoprecipitates were separated on mini-gels (Invitrogen), and TRAF6 and K63 ubiquitination of TRAF6 were detected by immunoblotting with an antibody for either K63 Ub (cat. #5621; Cell Signaling Technology) or TRAF6 (cat. #sc-8409; Santa Cruz Biotechnology).

### Immunoprecipitation and immunoblotting

Co-immunoprecipitation was performed as described previously.<sup>25</sup> In brief, cells were collected with ice-cold PBS and lysed by three freeze-thaw cycles in PBS containing 0.1% Triton X-100 and protease and phosphatase inhibitors, then centrifuged at 13,000 rpm for 15 min at 4°C. The supernatants were incubated with 10 μL of Protein A/G agarose beads (cat. #20423; Pierce, Rockford, IL, USA) for 2 h to remove endogenous immunoglobulin G and centrifuged at 5,000 rpm for 5 min to remove the beads. For immunoprecipitation,

protein samples were incubated with 3 μg of primary antibodies at 4°C for 12 h on a rocking platform. Protein A/G agarose beads (20 μL) were then added to enrich the primary antibody/protein complex for another 4 h on a rocking platform. The beads were washed five times with PBS containing 0.1% Triton X-100. Immunocomplexes were eluted using 2× SDS sample buffer and boiled at 100°C for 5 min.

Immunoblotting was performed as described previously.<sup>65</sup> Cells were lysed in lysis buffer including proteinase/phosphatase inhibitors (cat. #MSSAFE; Sigma), and nuclear and cytoplasmic proteins were extracted. Cleared lysates were separated using 8%–15% SDS-PAGE. Proteins were transferred onto polyvinylidene fluoride membranes (cat. #IPVH00010; Millipore). The membranes were blocked with 5% non-fat dry milk (cat. #9999; Cell Signaling Technology) in TBST buffer (cat. #9997; Cell Signaling Technology) at room temperature and then incubated with the indicated primary antibodies at 4°C overnight. The antibody to mouse NLRC3 (cat. #ab77817; Abcam, Cambridge, UK) was used at 1:500 dilution in 5% non-fat milk. The other antibodies are listed in Table S4 and were used at 1:1,000 dilution; all secondary antibodies were used at a 1:40,000 dilution. Band densities were normalized to β-actin expression.

### NFAT5 transcriptional activity assay

A green fluorescent protein (GFP)-NFAT5 promoter reporter system with two NF-κB binding sites and a NFAT5 transcriptional reporter with consensus sequence (TGG AAA ATT ACC G) were constructed as previously described<sup>46</sup> and then transfected into NLRC3 stable knockdown RAW 264.7 with Lipofectamine 3000 (cat. #L3000015; Invitrogen). The cells were then made tolerant and rechallenged by LPS for the indicated time. Reporter gene activity was assessed by measuring GFP expression using a FACSDiva flow cytometer (BD Biosciences).

### Chromatin immunoprecipitation

ChIP assays were performed according to the manufacturer's protocol (Pierce Agarose ChIP kit, cat. #26156; Pierce).<sup>35</sup> In brief, macrophages were harvested and fixed with 1% formaldehyde for 5 min at 37°C. The chromatin was purified by micrococcal nuclease digestion, after which soluble chromatin-containing lysates were immunoprecipitated with an anti-p65 antibody (cat. #8242; Cell Signaling Technology). The DNA sequences were amplified by PCR with specific primers to analyze p65/NF-κB binding capacity. Primers used to amplify NFAT5-bound regions were 5'-TTT GGA GGA TCC CTC TTC AC-3' and 5'-ACA AGT CAA GAA GGG CCA AG-3'. Enrichment of DNA fragments was normalized against an NFAT5 exon region using the following control primers: 5'-GCG AGA TGA TGT CAC TTC AG-3' and 5'-GTG GAA GTT TGA CTG TGG AC-3'.<sup>46</sup>

### RNA-seq analysis

Total RNA was isolated from  $1.0 \times 10^6$  BMDMs as previously described.<sup>1,64</sup> RNA samples were obtained from BMDMs with or without LPS treatment in three independent WT and NLRC3<sup>-/-</sup> mice. RNA concentration and integrity were verified using a

Nanodrop analyzer (Agilent). High-quality RNA was used for cDNA library construction. RNA-seq libraries were generated with the KAPA Stranded RNA-Seq Kit for Illumina with multiplexing primers, according to the supplier's protocols, after which RNA-seq was conducted with the Illumina Nova sequencer (Illumina, San Diego, CA, USA). Differential gene expression analysis was performed using DESeq R package (ver. 1.10.1) with raw gene counts output from Rsubread. Counts for NLRC3 were based on number of RNA sequences in the deleted region of NLRC3 in NLRC3<sup>-/-</sup> mouse: from the final 103 bp of exon 2 to the first 35 bp of exon 4.<sup>20</sup> The RNA-seq data used to identify targeting gene expression patterns of NFAT5 were obtained from the NCBI's GEO database (GEO: GSE76554 and GSE49604).<sup>45,53</sup> Raw sequence data were downloaded and analyzed with HISAT2 (ver. 2.0.5.2). Heatmaps of gene expression were generated using the pheatmap R package, and differential expression was analyzed using DESeq, GSeq, and R packages. Subsequent gene ontology/Kyoto Encyclopedia of Genes and Genomes (KEGG) enrichment analysis was performed based on differentially expressed genes identified in the previous step (adjusted  $p < 0.05$ ) using the limma package (ver. 3.36.5), clusterProfiler package (ver. 3.8.1), and org.Hs.eg.db package (ver. 3.6.0) of R software.

#### Recombinant adeno-associated virus and intrapulmonary targeting interference

An rAAV vector carrying macrophage-specific NLRC3 deletion plasmid was generated by Hanbio Biotechnology (Shanghai, China). The AAV9 system harbors a macrophage-specific synthetic promoter 146,<sup>68</sup> an miR30-based shRNA targeting NLRC3,<sup>69</sup> a cytomegalovirus promoter, and an enhanced GFP reporter. The nucleotide shRNA of NLRC3 was cloned using the following sequence: 5'-GAG AAC CAC GGT CTG CAC CAT ATT A-3'. Four-week-old male mice were administered with AAV-SP-shNLRC3 or AAV-Ctrl shRNA virus at a dose of  $1 \times 10^{11}$  viral particles in 20  $\mu$ L of PBS per mouse via intratracheal injection. GFP expression levels in infected macrophages were detected with flow cytometry and NLRC3 expression by real-time PCR on day 28 after AAV injection. The survival rate, bacterial load, and cytokine levels were assessed as described above.

#### Quantification and statistical analysis

Data are shown as mean  $\pm$  standard error (SE). When multiple experiments using different numbers of animals were pooled for statistical analysis, the exact number (n) is indicated in the figure legend. Two-sided Student's *t* tests were used to compare two groups. For multiple comparisons, one- or two-way ANOVA was performed followed by post hoc Bonferroni tests for two comparisons between groups. The correlation analysis was performed by Pearson rank correlation tests. Kaplan-Meier survival curves were compared using log-rank tests. All statistical tests were two-tailed with significance set at  $p < 0.05$ . All data were analyzed using GraphPad Prism software (ver. 8.3.0) (GraphPad Software, San Diego, CA, USA).

#### Ethics statement

This protocol was approved by the Institutional Review Board of Tongji Medical College (No. 2019 (S1001)). Informed consent for

the studies was obtained according to the Declaration of Helsinki. All animal protocols were performed in accordance with the institutional guidelines approved by the Tongji Medical College, Huazhong University of Science and Technology Animal Care and Use Committee.

#### DATA AND MATERIALS AVAILABILITY

The authors declare that all data are available in the article and [supplemental information](#) from the corresponding author upon reasonable request. The RNA-seq data have been deposited in the NCBI GEO repository with the accession numbers GEO: GSE211989, GSE49604, and GSE76554.

#### SUPPLEMENTAL INFORMATION

Supplemental information can be found online at <https://doi.org/10.1016/j.ymthe.2022.08.023>.

#### ACKNOWLEDGMENTS

This study was supported by National Natural Science Foundation of China (nos. 81772047, 81971818, 82002026, and 82002099). We thank Bioacme Biotechnology (Wuhan, China) for RNA-sequencing.

#### AUTHOR CONTRIBUTIONS

Conceptualization: Y.S., S.Ya., and J.X. methodology: J.X., C.G., Y.Q., X.Zh., S.Yu., S.Ya., and Y.S. investigation: J.X., Y.H., Z.P., X.F., H.X., M.S., D.S., and C.G. visualization: J.X., Y.S., S.Ya., Y.H., Y.Q., and X.Zh. supervision: S.Yu., S.Ya., and Y.S. writing—original draft: J.X., S.Ya., and Y.S. writing—review & editing: J.X., Y.Q., X.Zh., S.Ya., and Y.S.

#### DECLARATION OF INTERESTS

The authors declare that they have no competing interests.

#### REFERENCES

- Nedeva, C., Menassa, J., Duan, M., Liu, C., Doerflinger, M., Kueh, A.J., Herold, M.J., Fonseka, P., Phan, T.K., Faou, P., et al. (2020). TREM1/4 receptor regulates inflammation and innate immune cell death during polymicrobial sepsis. *Nat. Immunol.* 21, 1585–1596.
- Hotchkiss, R.S., Monneret, G., and Payen, D. (2013). Sepsis-induced immunosuppression: from cellular dysfunctions to immunotherapy. *Nat. Rev. Immunol.* 13, 862–874.
- Yuk, S.A., Kim, H., Abutaleb, N.S., Dieterly, A.M., Taha, M.S., Tsifansky, M.D., Lyle, L.T., Seleem, M.N., and Yeo, Y. (2021). Nanocapsules modify membrane interaction of polymyxin B to enable safe systemic therapy of Gram-negative sepsis. *Sci. Adv.* 7, eabj1577.
- Esteban, A., Frutos-Vivar, F., Ferguson, N.D., Peñuelas, O., Lorente, J.A., Gordo, F., Honrubia, T., Algora, A., Bustos, A., Garcia, G., et al. (2007). Sepsis incidence and outcome: contrasting the intensive care unit with the hospital ward. *Crit. Care Med.* 35, 1284–1289.
- Seeley, J.J., Baker, R.G., Mohamed, G., Bruns, T., Hayden, M.S., Deshmukh, S.D., Freedberg, D.E., and Ghosh, S. (2018). Induction of innate immune memory via microRNA targeting of chromatin remodelling factors. *Nature* 559, 114–119.
- Otto, G.P., Sossdorf, M., Claus, R.A., Rödel, J., Menge, K., Reinhart, K., Bauer, M., and Riedemann, N.C. (2011). The late phase of sepsis is characterized by an increased microbiological burden and death rate. *Crit. Care* 15, R183.

7. Deng, J.C., Cheng, G., Newstead, M.W., Zeng, X., Kobayashi, K., Flavell, R.A., and Standiford, T.J. (2006). Sepsis-induced suppression of lung innate immunity is mediated by IRAK-M. *J. Clin. Invest.* *116*, 2532–2542.
8. Roquilly, A., McWilliam, H.E.G., Jacqueline, C., Tian, Z., Cinotti, R., Rimbart, M., Wakim, L., Caminschi, I., Lahoud, M.H., Belz, G.T., et al. (2017). Local modulation of antigen-presenting cell development after resolution of pneumonia induces long-term susceptibility to secondary infections. *Immunity* *47*, 135–147.e5.
9. Iwasaki, A., and Medzhitov, R. (2015). Control of adaptive immunity by the innate immune system. *Nat. Immunol.* *16*, 343–353.
10. Langston, P.K., Nambu, A., Jung, J., Shibata, M., Aksoylar, H.I., Lei, J., Xu, P., Doan, M.T., Jiang, H., MacArthur, M.R., et al. (2019). Glycerol phosphate shuttle enzyme GPD2 regulates macrophage inflammatory responses. *Nat. Immunol.* *20*, 1186–1195.
11. Cavaillon, J.M., and Adib-Conquy, M. (2006). Bench-to-bedside review: endotoxin tolerance as a model of leukocyte reprogramming in sepsis. *Crit. Care* *10*, 233.
12. Cheng, S.C., Scicluna, B.P., Arts, R.J.W., Gresnigt, M.S., Lachmandas, E., Giamarellos-Bourboulis, E.J., Kox, M., Manjeri, G.R., Wagenaars, J.A.L., Cremer, O.L., et al. (2016). Broad defects in the energy metabolism of leukocytes underlie immunoparalysis in sepsis. *Nat. Immunol.* *17*, 406–413.
13. Krejčová, G., Danielová, A., Nedbalová, P., Kazek, M., Strych, L., Chawla, G., Tennessen, J.M., Lieskovská, J., Jindra, M., Doležal, T., and Bajgar, A. (2019). *Drosophila* macrophages switch to aerobic glycolysis to mount effective antibacterial defense. *Elife* *8*, e50414.
14. Tucey, T.M., Verma, J., Harrison, P.F., Snelgrove, S.L., Lo, T.L., Scherer, A.K., Barugahare, A.A., Powell, D.R., Wheeler, R.T., Hickey, M.J., et al. (2018). Glucose homeostasis is important for immune cell viability during *Candida* challenge and host survival of systemic fungal infection. *Cell Metab.* *27*, 988–1006.e7.
15. Van den Bossche, J., O'Neill, L.A., and Menon, D. (2017). Macrophage immunometabolism: where are we (Going)? *Trends Immunol.* *38*, 395–406.
16. He, Y.J., Xu, J.Q., Sun, M.M., Fang, X.Z., Peng, Z.K., Pan, S.W., Zhou, T., Wang, Y.X., and Shang, Y. (2020). Glucocorticoid-induced leucine zipper: a promising marker for monitoring and treating sepsis. *Front. Immunol.* *11*, 606649.
17. Davies, R., O'Dea, K., and Gordon, A. (2018). Immune therapy in sepsis: are we ready to try again? *J. Intensive Care Soc.* *19*, 326–344.
18. Delano, M.J., and Ward, P.A. (2016). Sepsis-induced immune dysfunction: can immune therapies reduce mortality? *J. Clin. Invest.* *126*, 23–31.
19. Wiersinga, W.J., Leopold, S.J., Cranendonk, D.R., and van der Poll, T. (2014). Host innate immune responses to sepsis. *Virulence* *5*, 36–44.
20. Schneider, M., Zimmermann, A.G., Roberts, R.A., Zhang, L., Swanson, K.V., Wen, H., Davis, B.K., Allen, I.C., Holl, E.K., Ye, Z., et al. (2012). The innate immune sensor NLR3 attenuates Toll-like receptor signaling via modification of the signaling adaptor TRAF6 and transcription factor NF- $\kappa$ B. *Nat. Immunol.* *13*, 823–831.
21. Uchimura, T., Oyama, Y., Deng, M., Guo, H., Wilson, J.E., Rampanelli, E., Cook, K.D., Misumi, I., Tan, X., Chen, L., et al. (2018). The innate immune sensor NLR3 acts as a rheostat that fine-tunes T cell responses in infection and autoimmunity. *Immunity* *49*, 1049–1061.e6.
22. Hu, S., Du, X., Huang, Y., Fu, Y., Yang, Y., Zhan, X., He, W., Wen, Q., Zhou, X., Zhou, C., et al. (2018). NLR3 negatively regulates CD4<sup>+</sup> T cells and impacts protective immunity during *Mycobacterium tuberculosis* infection. *Plos Pathog.* *14*, e1007266.
23. Conti, B.J., Davis, B.K., Zhang, J., O'Connor, W., Jr., Williams, K.L., and Ting, J.P.Y. (2005). CATERPILLER 16.2 (CLR16.2), a novel NBD/LRR family member that negatively regulates T cell function. *J. Biol. Chem.* *280*, 18375–18385.
24. Karki, R., Malireddi, R.K.S., Zhu, Q., and Kanneganti, T.D. (2017). NLR3 regulates cellular proliferation and apoptosis to attenuate the development of colorectal cancer. *Cell Cycle* *16*, 1243–1251.
25. Karki, R., Man, S.M., Malireddi, R.K.S., Kesavardhana, S., Zhu, Q., Burton, A.R., Sharma, B.R., Qi, X., Pelletier, S., Vogel, P., et al. (2016). NLR3 is an inhibitory sensor of PI3K-mTOR pathways in cancer. *Nature* *540*, 583–587.
26. Wan, W., You, Z., Xu, Y., Zhou, L., Guan, Z., Peng, C., Wong, C.C.L., Su, H., Zhou, T., Xia, H., and Liu, W. (2017). mTORC1 phosphorylates acetyltransferase p300 to regulate autophagy and lipogenesis. *Mol. Cell* *68*, 323–335.e6.
27. Mithal, L.B., Arshad, M., Swigart, L.R., Khanolkar, A., Ahmed, A., and Coates, B.M. (2022). Mechanisms and modulation of sepsis-induced immune dysfunction in children. *Pediatr. Res.* *91*, 447–453.
28. Cao, J., Xu, F., Lin, S., Song, Z., Zhang, L., Luo, P., Xu, H., Li, D., Zheng, K., Ren, G., and Yin, Y. (2014). IL-27 controls sepsis-induced impairment of lung antibacterial host defence. *Thorax* *69*, 926–937.
29. Dan, C., Jinjun, B., Zi-Chun, H., Lin, M., Wei, C., Xu, Z., Ri, Z., Shun, C., Wen-Zhu, S., Qing-Cai, J., and Wu, Y. (2015). Modulation of TNF- $\alpha$  mRNA stability by human antigen R and miR181s in sepsis-induced immunoparalysis. *EMBO Mol. Med.* *7*, 140–157.
30. Hoetzenecker, W., Echtenacher, B., Guenova, E., Hoetzenecker, K., Woelbing, F., Brück, J., Teske, A., Valtcheva, N., Fuchs, K., Kneilling, M., et al. (2011). ROS-induced ATF3 causes susceptibility to secondary infections during sepsis-associated immunosuppression. *Nat. Med.* *18*, 128–134.
31. Kim, E.Y., Ner-Gaon, H., Varon, J., Cullen, A.M., Guo, J., Choi, J., Barragan-Bradford, D., Higuera, A., Pinilla-Vera, M., Short, S.A., et al. (2020). Post-sepsis immunosuppression depends on NKT cell regulation of mTOR/IFN- $\gamma$  in NK cells. *J. Clin. Invest.* *130*, 3238–3252.
32. Mages, J., Dietrich, H., and Lang, R. (2007). A genome-wide analysis of LPS tolerance in macrophages. *Immunobiology* *212*, 723–737.
33. Foster, S.L., Hargreaves, D.C., and Medzhitov, R. (2007). Gene-specific control of inflammation by TLR-induced chromatin modifications. *Nature* *447*, 972–978.
34. Vaeth, M., Maus, M., Klein-Hessling, S., Freinkman, E., Yang, J., Eckstein, M., Cameron, S., Turvey, S.E., Serfling, E., Berberich-Siebelt, F., et al. (2017). Store-operated Ca(2+) entry controls clonal expansion of T cells through metabolic reprogramming. *Immunity* *47*, 664–679.e6.
35. Yuk, J.M., Kim, T.S., Kim, S.Y., Lee, H.M., Han, J., Dufour, C.R., Kim, J.K., Jin, H.S., Yang, C.S., Park, K.S., et al. (2015). Orphan nuclear receptor ERR $\alpha$  controls macrophage metabolic signaling and A20 expression to negatively regulate TLR-induced inflammation. *Immunity* *43*, 80–91.
36. Voss, K., Hong, H.S., Bader, J.E., Sugiura, A., Lyssiotis, C.A., and Rathmell, J.C. (2021). A guide to interrogating immunometabolism. *Nat. Rev. Immunol.* *21*, 637–652.
37. Yang, F., Ye, X.J., Chen, M.Y., Li, H.C., Wang, Y.F., Zhong, M.Y., Zhong, C.S., Zeng, B., Xu, L.H., He, X.H., and Ouyang, D.Y. (2021). Inhibition of NLRP3 inflammasome activation and pyroptosis in macrophages by taraxasterol is associated with its regulation on mTOR signaling. *Front. Immunol.* *12*, 632606.
38. Mauro, C., Leow, S.C., Anso, E., Rocha, S., Thotakura, A.K., Tornatore, L., Moretti, M., De Smaele, E., Beg, A.A., Tergaonkar, V., et al. (2011). NF- $\kappa$ B controls energy homeostasis and metabolic adaptation by upregulating mitochondrial respiration. *Nat. Cell Biol.* *13*, 1272–1279.
39. Londhe, P., Yu, P.Y., Jjiri, Y., Ladner, K.J., Fenger, J.M., London, C., Houghton, P.J., and Guttridge, D.C. (2018). Classical NF- $\kappa$ B metabolically reprograms sarcoma cells through regulation of hexokinase 2. *Front. Oncol.* *8*, 104.
40. Kracht, M., Müller-Ladner, U., and Schmitz, M.L. (2020). Mutual regulation of metabolic processes and proinflammatory NF- $\kappa$ B signaling. *J. Allergy Clin. Immunol.* *146*, 694–705.
41. Meylan, E., Dooley, A.L., Feldser, D.M., Shen, L., Turk, E., Ouyang, C., and Jacks, T. (2009). Requirement for NF- $\kappa$ B signalling in a mouse model of lung adenocarcinoma. *Nature* *462*, 104–107.
42. Macian, F. (2005). NFAT proteins: key regulators of T-cell development and function. *Nat. Rev. Immunol.* *5*, 472–484.
43. Müller, M.R., and Rao, A. (2010). NFAT, immunity and cancer: a transcription factor comes of age. *Nat. Rev. Immunol.* *10*, 645–656.
44. Aramburu, J., and López-Rodríguez, C. (2019). Regulation of inflammatory functions of macrophages and T lymphocytes by NFAT5. *Front. Immunol.* *10*, 535.
45. Choi, S., You, S., Kim, D., Choi, S.Y., Kwon, H.M., Kim, H.S., Hwang, D., Park, Y.J., Cho, C.S., and Kim, W.U. (2017). Transcription factor NFAT5 promotes macrophage survival in rheumatoid arthritis. *J. Clin. Invest.* *127*, 954–969.
46. Han, E.J., Kim, H.Y., Lee, N., Kim, N.H., Yoo, S.A., Kwon, H.M., Jue, D.M., Park, Y.J., Cho, C.S., De, T.Q., et al. (2017). Suppression of NFAT5-mediated inflammation and chronic arthritis by novel  $\kappa$ B-binding inhibitors. *EBioMedicine* *18*, 261–273.

47. Lee, H.H., Sanada, S., An, S.M., Ye, B.J., Lee, J.H., Seo, Y.K., Lee, C., Lee-Kwon, W., Küper, C., Neuhofer, W., et al. (2016). LPS-induced NF $\kappa$ B enhanceosome requires TonEBP/NFAT5 without DNA binding. *Sci. Rep.* 6, 24921.
48. Wang, Y., Tu, K., Liu, D., Guo, L., Chen, Y., Li, Q., Maiers, J.L., Liu, Z., Shah, V.H., Dou, C., et al. (2019). p300 acetyltransferase is a cytoplasm-to-nucleus shuttle for SMAD2/3 and TAZ nuclear transport in transforming Growth factor  $\beta$ -stimulated hepatic stellate cells. *Hepatology* 70, 1409–1423.
49. Ye, L., Park, J.J., Dong, M.B., Yang, Q., Chow, R.D., Peng, L., Du, Y., Guo, J., Dai, X., Wang, G., et al. (2019). In vivo CRISPR screening in CD8 T cells with AAV-Sleeping Beauty hybrid vectors identifies membrane targets for improving immunotherapy for glioblastoma. *Nat. Biotechnol.* 37, 1302–1313.
50. Jing, C., Castro-Dopico, T., Richoz, N., Tuong, Z.K., Ferdinand, J.R., Lok, L.S.C., Loudon, K.W., Banham, G.D., Mathews, R.J., Cader, Z., et al. (2020). Macrophage metabolic reprogramming presents a therapeutic target in lupus nephritis. *Proc. Natl. Acad. Sci. USA* 117, 15160–15171.
51. Kang, S., Nakanishi, Y., Kioi, Y., Okuzaki, D., Kimura, T., Takamatsu, H., Koyama, S., Nojima, S., Nishide, M., Hayama, Y., et al. (2018). Semaphorin 6D reverse signaling controls macrophage lipid metabolism and anti-inflammatory polarization. *Nat. Immunol.* 19, 561–570.
52. Lopez-Rodríguez, C., Aramburu, J., Rakeman, A.S., and Rao, A. (1999). NFAT5, a constitutively nuclear NFAT protein that does not cooperate with Fos and Jun. *Proc. Natl. Acad. Sci. USA* 96, 7214–7219.
53. Buxadé, M., Lunazzi, G., Minguillón, J., Iborra, S., Berga-Bolaños, R., Del Val, M., Aramburu, J., and López-Rodríguez, C. (2012). Gene expression induced by Toll-like receptors in macrophages requires the transcription factor NFAT5. *J. Exp. Med.* 209, 379–393.
54. Buxadé, M., Huerga Encabo, H., Riera-Borrull, M., Quintana-Gallardo, L., López-Cotarelo, P., Tellechea, M., Martínez-Martínez, S., Redondo, J.M., Martín-Caballero, J., Flores, J.M., et al. (2018). Macrophage-specific MHCII expression is regulated by a remote Ciita enhancer controlled by NFAT5. *J. Exp. Med.* 215, 2901–2918.
55. Mira, J.C., Gentile, L.F., Mathias, B.J., Efron, P.A., Brakenridge, S.C., Mohr, A.M., Moore, F.A., and Moldawer, L.L. (2017). Sepsis pathophysiology, chronic critical illness, and persistent inflammation-immunosuppression and catabolism syndrome. *Crit. Care Med.* 45, 253–262.
56. Brakenridge, S.C., Efron, P.A., Cox, M.C., Stortz, J.A., Hawkins, R.B., Ghita, G., Gardner, A., Mohr, A.M., Anton, S.D., Moldawer, L.L., and Moore, F.A. (2019). Current epidemiology of surgical sepsis: discordance between inpatient mortality and 1-year outcomes. *Ann. Surg.* 270, 502–510.
57. Singer, M., Deutschman, C.S., Seymour, C.W., Shankar-Hari, M., Annane, D., Bauer, M., Bellomo, R., Bernard, G.R., Chiche, J.D., Coopersmith, C.M., et al. (2016). The third international consensus definitions for sepsis and septic shock (Sepsis-3). *Jama* 315, 801–810.
58. van Vught, L.A., Klein Klouwenberg, P.M.C., Spitoni, C., Scicluna, B.P., Wiewel, M.A., Horn, J., Schultz, M.J., Nürnberg, P., Bonten, M.J.M., Cremer, O.L., et al. (2016). Incidence, risk factors, and attributable mortality of secondary infections in the intensive care unit after admission for sepsis. *Jama* 315, 1469–1479.
59. Xu, Y., Meng, C., Liu, G., Yang, D., Fu, L., Zhang, M., Zhang, Z., Xia, H., Yao, S., and Zhang, S. (2016). Classically activated macrophages protect against lipopolysaccharide-induced acute lung injury by expressing amphiregulin in mice. *Anesthesiology* 124, 1086–1099.
60. Kim, E., Beon, J., Lee, S., Park, S.J., Ahn, H., Kim, M.G., Park, J.E., Kim, W., Yuk, J.M., Kang, S.J., et al. (2017). Inositol polyphosphate multikinase promotes Toll-like receptor-induced inflammation by stabilizing TRAF6. *Sci. Adv.* 3, e1602296.
61. Yuk, J.M., Shin, D.M., Lee, H.M., Kim, J.J., Kim, S.W., Jin, H.S., Yang, C.S., Park, K.A., Chanda, D., Kim, D.K., et al. (2011). The orphan nuclear receptor SHP acts as a negative regulator in inflammatory signaling triggered by Toll-like receptors. *Nat. Immunol.* 12, 742–751.
62. Hoogerwerf, J.J., Leendertse, M., Wieland, C.W., de Vos, A.F., de Boer, J.D., Florquin, S., and van der Poll, T. (2011). Loss of suppression of tumorigenicity 2 (ST2) gene reverses sepsis-induced inhibition of lung host defense in mice. *Am. J. Respir. Crit. Care Med.* 183, 932–940.
63. Zhang, H., Zeng, L., Xie, M., Liu, J., Zhou, B., Wu, R., Cao, L., Kroemer, G., Wang, H., Billiar, T.R., et al. (2020). TMEM173 drives lethal coagulation in sepsis. *Cell Host Microbe* 27, 556–570.e6.
64. Xu, J., Hu, H., Chen, B., Yue, R., Zhou, Z., Liu, Y., Zhang, S., Xu, L., Wang, H., and Yu, Z. (2015). Lycopene protects against hypoxia/reoxygenation injury by alleviating ER stress induced apoptosis in neonatal mouse cardiomyocytes. *PLoS One* 10, e0136443.
65. Xu, J., Li, H.B., Chen, L., Wang, Y.X., Lu, S., Li, S.N., Cui, S.N., Xiao, H.R., Qin, L., Hu, H., et al. (2019). BML-111 accelerates the resolution of inflammation by modulating the Nrf2/HO-1 and NF- $\kappa$ B pathways in rats with ventilator-induced lung injury. *Int. Immunopharmacol.* 69, 289–298.
66. de Tymowski, C., Heming, N., Correia, M.D.T., Abbad, L., Chavarot, N., Le Stang, M.B., Flament, H., Bex, J., Boedec, E., Bounaix, C., et al. (2019). CD89 is a potent innate receptor for bacteria and mediates host protection from sepsis. *Cell Rep.* 27, 762–775.e5.
67. Xiong, Y., Qiu, F., Piao, W., Song, C., Wahl, L.M., and Medvedev, A.E. (2011). Endotoxin tolerance impairs IL-1 receptor-associated kinase (IRAK) 4 and TGF- $\beta$ -activated kinase 1 activation, K63-linked polyubiquitination and assembly of IRAK1, TNF receptor-associated factor 6, and I $\kappa$ B kinase gamma and increases A20 expression. *J. Biol. Chem.* 286, 7905–7916.
68. Kang, W.S., Kwon, J.S., Kim, H.B., Jeong, H.Y., Kang, H.J., Jeong, M.H., Cho, J.G., Park, J.C., Kim, Y.S., and Ahn, Y. (2014). A macrophage-specific synthetic promoter for therapeutic application of adiponectin. *Gene Ther.* 21, 353–362.
69. Fellmann, C., Hoffmann, T., Sridhar, V., Hopfgartner, B., Muhar, M., Roth, M., Lai, D.Y., Barbosa, I.A.M., Kwon, J.S., Guan, Y., et al. (2013). An optimized microRNA backbone for effective single-copy RNAi. *Cell Rep.* 5, 1704–1713.

## **Supplemental Information**

### **NLRC3 expression in macrophage impairs glycolysis and host immune defense by modulating the NF- $\kappa$ B- NFAT5 complex during septic immunosuppression**

**Jiqian Xu, Chenggang Gao, Yajun He, Xiangzhi Fang, Deyi Sun, Zhekang Peng, Hairong Xiao, Miaomiao Sun, Pei Zhang, Ting Zhou, Xiaobo Yang, Yuan Yu, Ruiting Li, Xiaojing Zou, Huaqing Shu, Yang Qiu, Xi Zhou, Shiyong Yuan, Shanglong Yao, and You Shang**

**Fig. S1.**

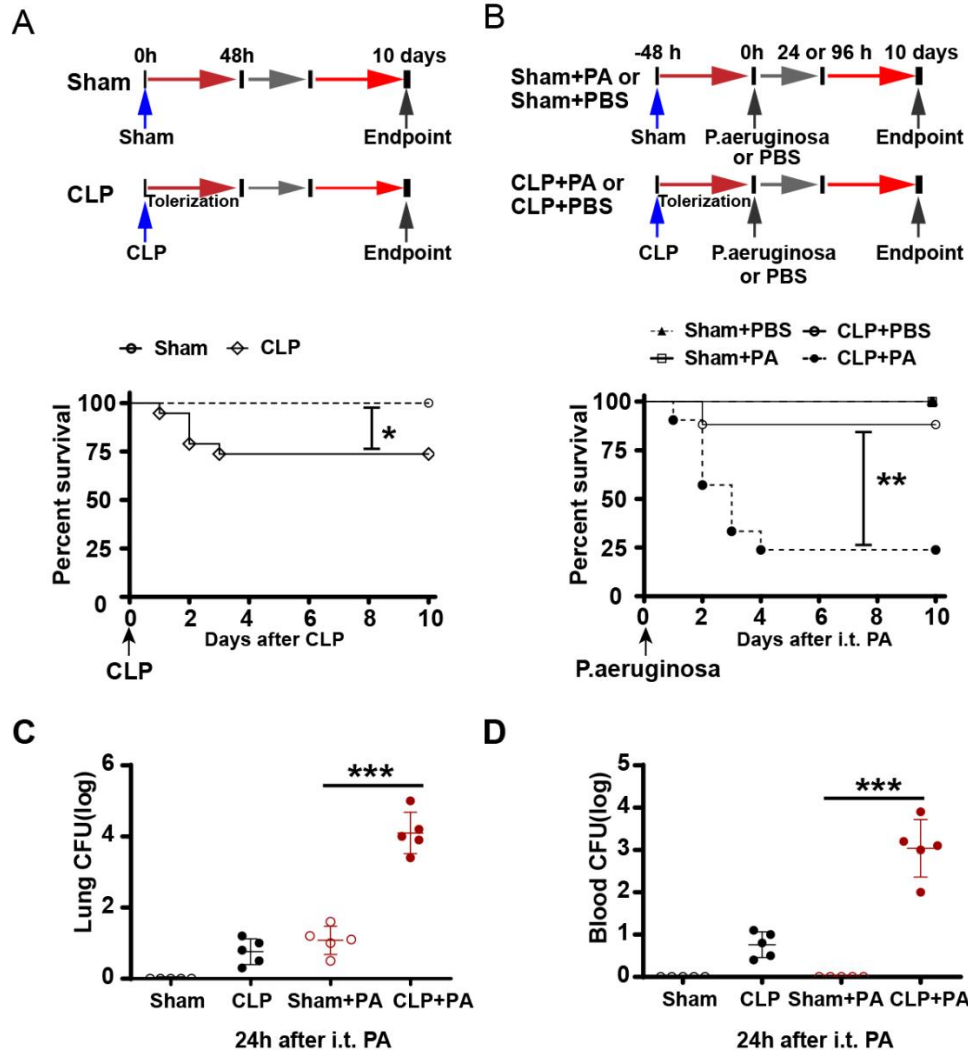

**Fig. S1.**

**Cecal ligation and puncture (CLP) impaired host lung immune responses.** Related to Figure 1 and 2. (A-B) Kaplan-Meier survival curves from wild-type (WT) mice subjected to CLP or sham surgery (A), surviving CLP or sham mice underwent secondary *P. aeruginosa* infection (n = 19 mice/group) (B). *P. aeruginosa* was administered intratracheally 48 h after CLP or sham operation, all mice were monitored for 10 days after operation or *P. aeruginosa* rechallenge for survival (n = 20 mice/group). (C-D) Bacterial loads in the lung (C) and blood (D) of surviving mice were measured 24 h after secondary *P. aeruginosa* infection (n = 6 mice/group). Circles represent individual mice. \*P < 0.05; \*\*P < 0.01; \*\*\*P < 0.001; NS: not significant (two-way ANOVA or Student's *t* test and log-rank test for survival).

Fig. S2.

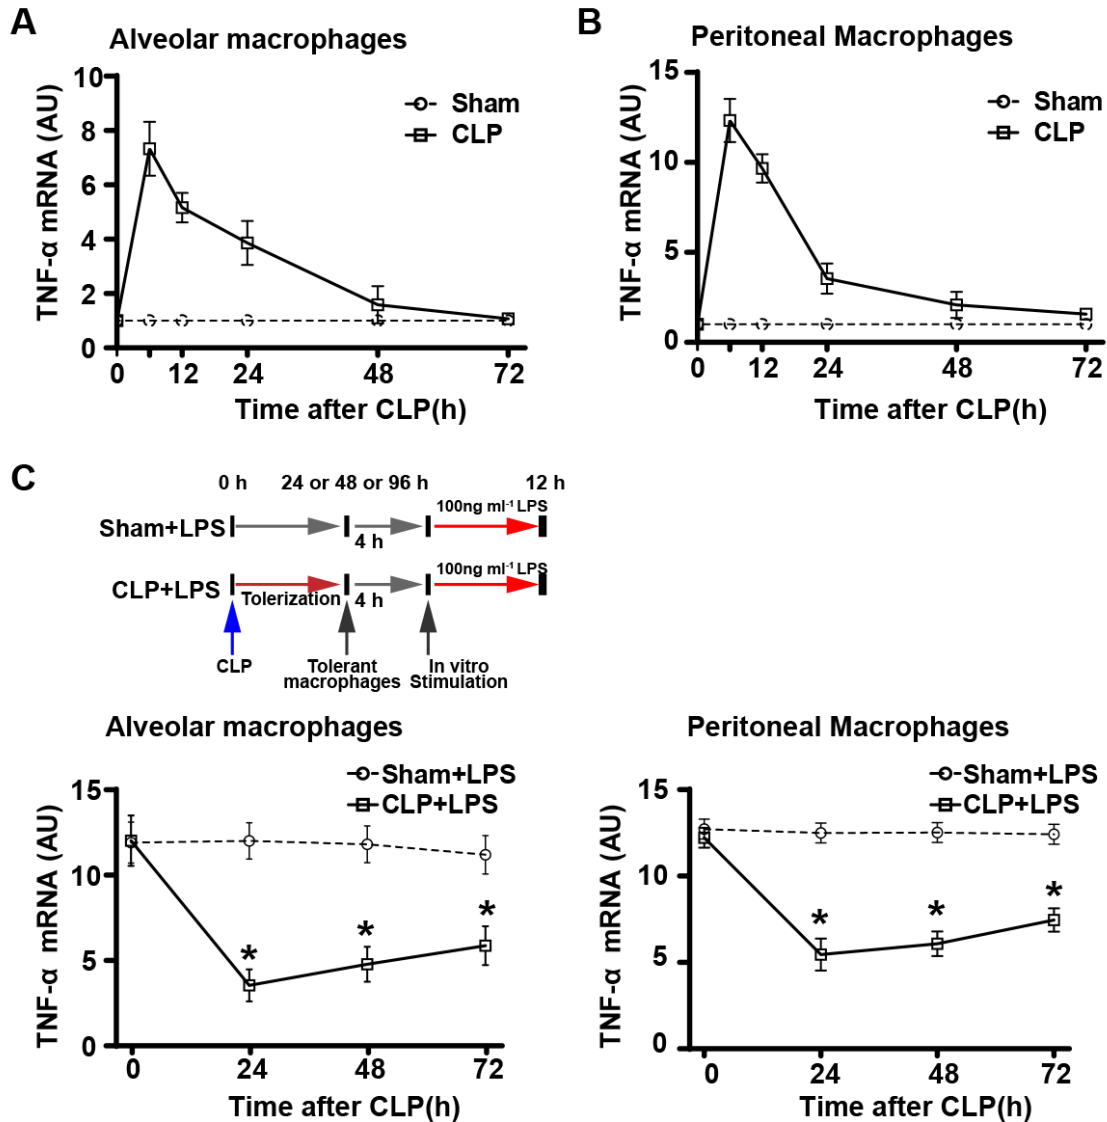

Fig. S2.

**CLP impaired immune responses of macrophages.** Related to Figure 1 and 2. (A-B) TNF- $\alpha$  mRNA expression in indicated alveolar macrophages (A) and peritoneal macrophages (B) at 6, 12, 24, 48, 72, 96, and 120 h after CLP (n = 8 mice/group). (C) TNF- $\alpha$  mRNA expression in indicated alveolar macrophages (left) and peritoneal macrophages (right) with secondary LPS stimulation at 24, 48, and 72 h post CLP or sham operation. (n = 6 mice/group). The data shown are presented as means  $\pm$  SE, \*P < 0.05; (two-way ANOVA or Student's *t* test).

Fig. S3.

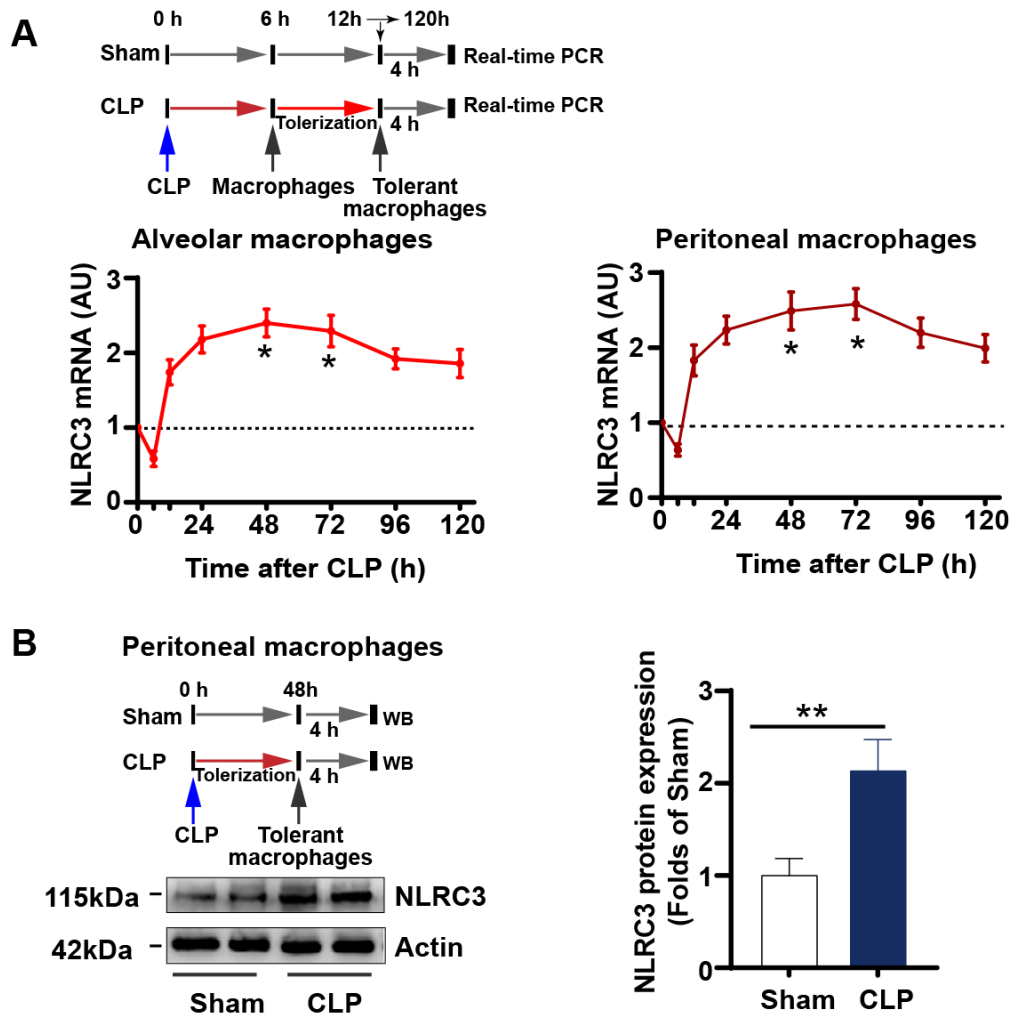

Fig. S3.

**CLP induced NLRC3 expression in macrophages.** Related to Figure 1 and 2. (A) NLRC3 mRNA expression in indicated alveolar macrophages (**left**) and peritoneal macrophages (**right**) at 6, 12, 24, 48, 72, 96, and 120 h after CLP ( $n = 6$  mice/group). NLRC3 protein expression in peritoneal macrophages (**B**) at 48h after CLP operation. The data shown are presented as means  $\pm$  SE, \* $P < 0.05$ ; \*\* $P < 0.01$  (two-way ANOVA or Student's  $t$  test).



**Fig. S4.**

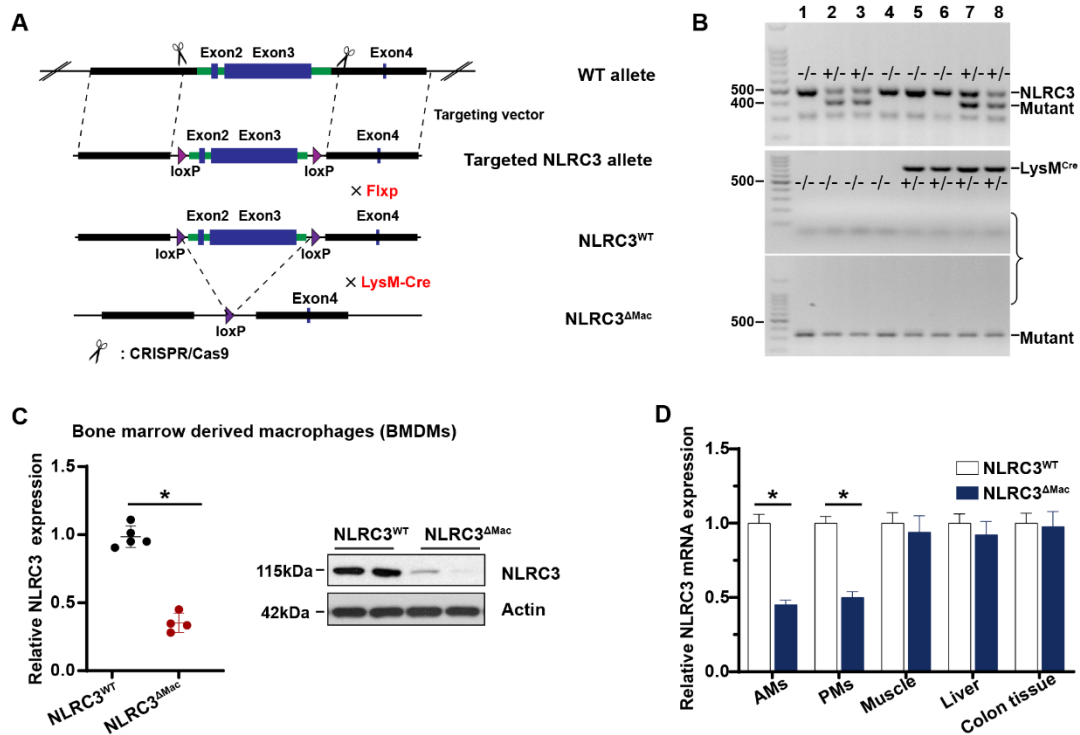

**Fig. S4.**

**Generation of myeloid lineage-specific conditional NLRC3-null mice.** Related to Figure 1 and 2. (A) A schematic of myeloid lineage-specific conditional NLRC3-null mice generation. Exon 2 was floxed in the targeted allele and excised in the conditional knockout allele. (B) Targeted disruption of the *Nlrc3* or *LysM<sup>Cre</sup>* gene was verified by PCR of genomic DNA isolated from candidate mice. (C) Immunoblot to detect the NLRC3 expression in BMDMs from NLRC3<sup>WT</sup> (*LysM-Cre-NLRC3<sup>fl/fl</sup>*) and NLRC3<sup>ΔMac</sup> (*LysM-Cre<sup>+</sup>NLRC3<sup>fl/fl</sup>*). (D) Real-time PCR to detect NLRC3 mRNA expression in alveolar macrophages (AMs); peritoneal macrophages (PMs); and muscle, liver, and colon tissue from NLRC3<sup>WT</sup> and NLRC3<sup>ΔMac</sup> mice. (n = 6 mice/group). Graphs show the mean ± SE of experiment replicates and are representative of at least three independent experiments. \*P < 0.05 (one- or two-way ANOVA or Student's *t* test).

**Fig. S5.**

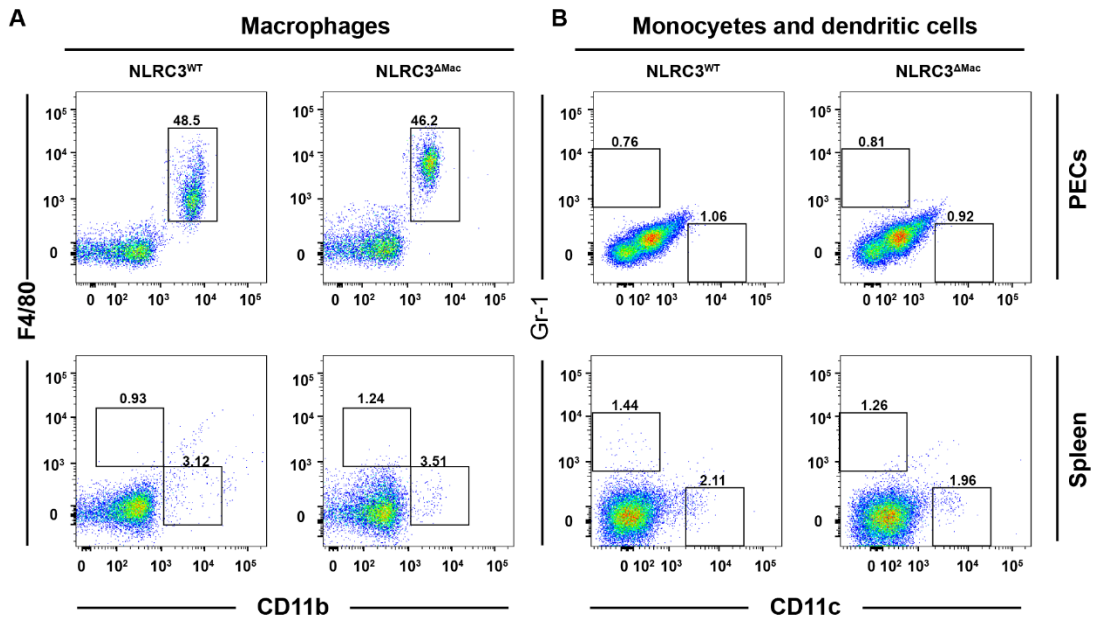

**Fig. S5.**

**Validation of myeloid lineage-specific conditional NLRC3-null mice.** Related to Figure 2. (A-B) Flow-cytometry analysis of specific cell surface markers for macrophages (A) and monocytes (B) from the peritoneal cavity (PECs) and spleen tissue isolated from mice of indicated genotypes. NLRC3<sup>WT</sup> (LysM-Cre-NLRC3<sup>fl/fl</sup>) littermates served as controls for NLRC3<sup>ΔMac</sup> (LysM-Cre<sup>+</sup> NLRC3<sup>fl/fl</sup>) mice. (n = 6 mice/group). Data are representative of three mice per group from three independent experiments.

**Fig. S6.**

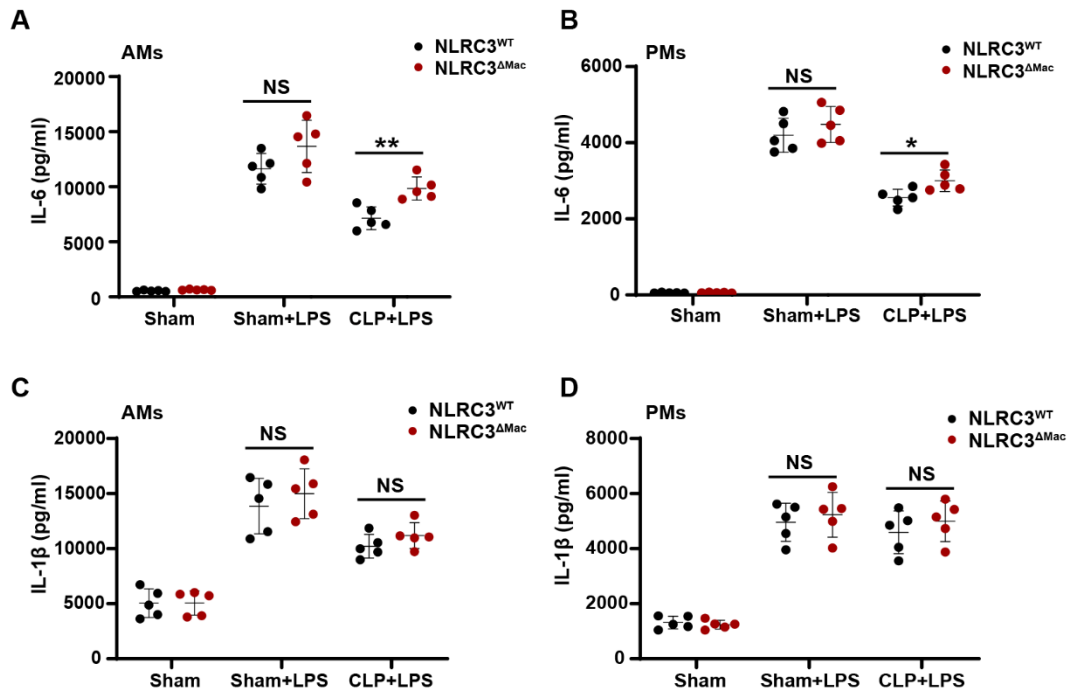

**Fig. S6.**

**NLRC3 depletion improved immune responses of macrophages from septic mice that underwent sepsis-induced immunosuppression.** Related to Figure 1. (A-B) ELISA for IL-6 in the supernatants of NLRC3<sup>WT</sup> or NLRC3<sup>ΔMac</sup> mouse AMs (A) and PMs (B) restimulated with LPS for 12 h at 48 h after CLP or sham operation. (C-D) ELISA for IL-1β in the supernatants of NLRC3<sup>WT</sup> or NLRC3<sup>ΔMac</sup> mouse AMs (C) and PMs (D) restimulated with LPS for 12 h at 48 h after CLP or sham operation. (n = 5 mice/group). Circles represent individual mice. Graphs show the mean ± SE of experiment replicates; \*P < 0.05; NS: not significant (one- or two-way ANOVA or Student's *t* test).

**Fig. S7.**

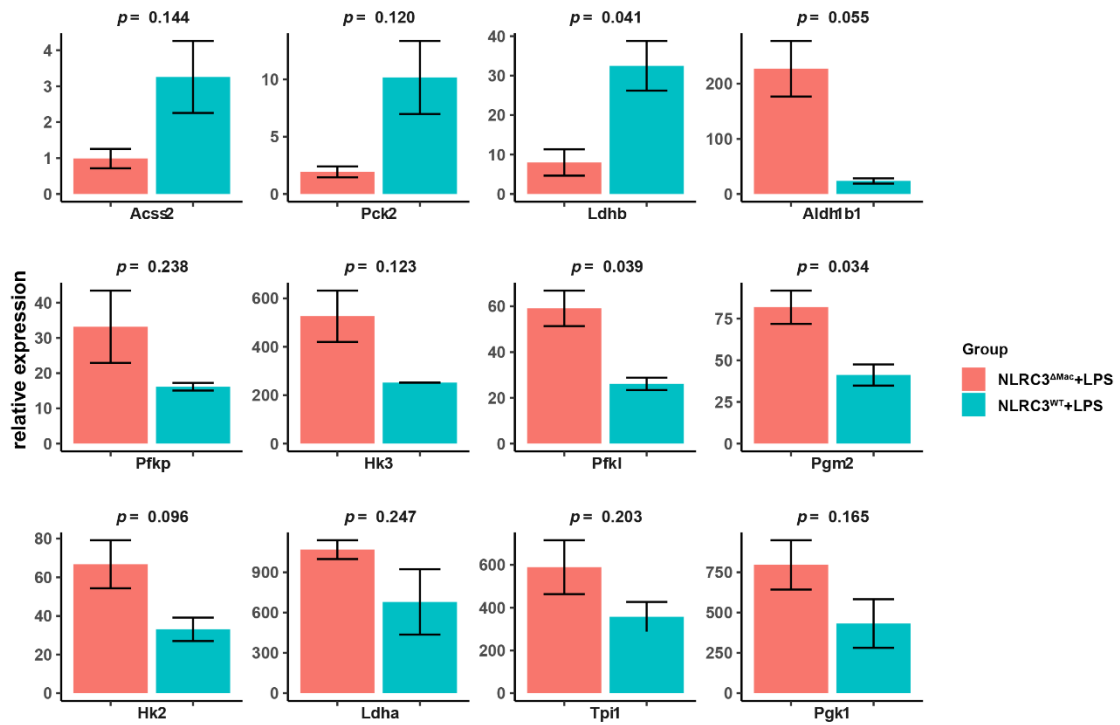

**Fig. S7.**

**Barplots the gene expression in BMDMs from the indicated genotypes.** Mouse BMDMs of NLRC3<sup>WT</sup> (LysM-Cre-NLRC3<sup>fl/fl</sup>) (n=3) and NLRC3<sup>ΔMac</sup> (LysM-Cre<sup>+</sup> NLRC3<sup>fl/fl</sup>) (n=3) were treated with LPS (100 ng/mL) and then analysed by RNA-seq in 3 pairs of samples. Total RNA of each sample was isolated from  $1.0 \times 10^6$  BMDMs. Barplots depicting comparison of relative gene expression of several glycolytic genes of interest between NLRC3<sup>WT</sup> group and NLRC3<sup>ΔMac</sup> group. Depicting p values are from Student's t-test. All tests were two-sided.

**Fig. S8.**

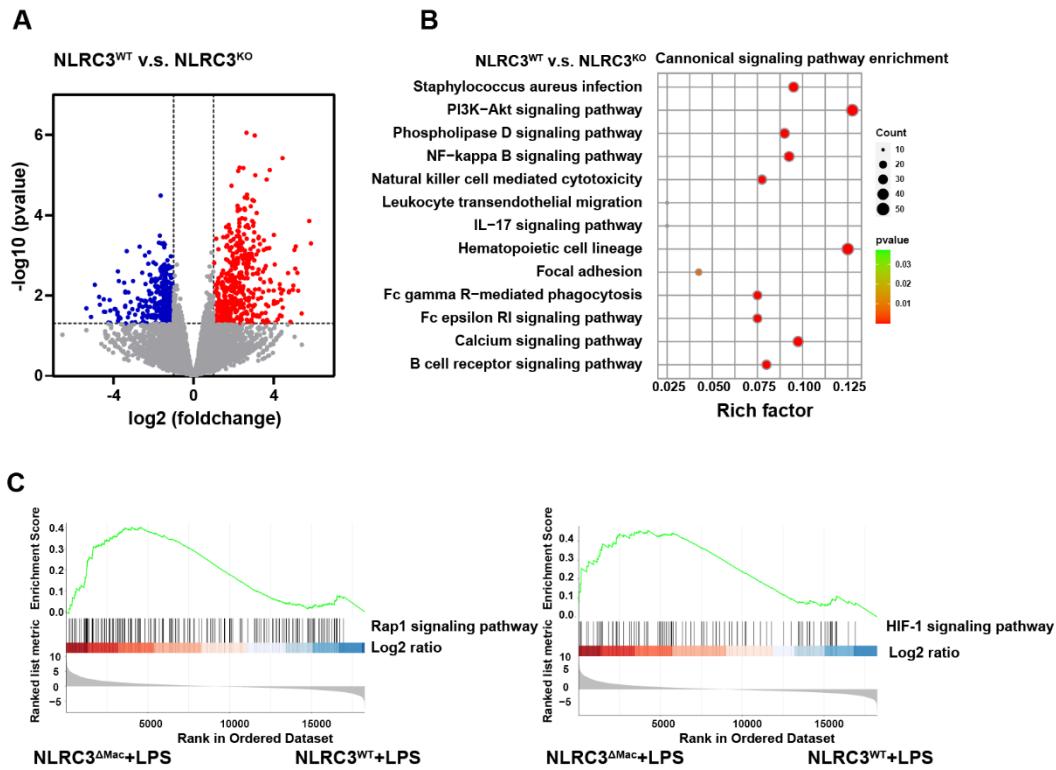

**Fig. S8.**

**Gene expression analysis in BMDMs from the indicated genotypes.** (A) Volcano plot representation of gene expression ( $\log_2$  values) alterations of RNA for NLRC3<sup>WT</sup> (LysM-Cre-NLRC3<sup>fl/fl</sup>) and NLRC3<sup>ΔMac</sup> (LysM-Cre<sup>+</sup> NLRC3<sup>fl/fl</sup>) macrophages. Red denotes over-expressed genes ( $\log_2$  fold change  $\geq 1$ ); blue denotes under-expression ( $\log_2$  fold change  $\leq -1$ ). The horizontal line depicts multiple comparison adjusted  $P = 0.05$ . (B) Scatter plot of the KEGG pathway enrichment analysis of the DEGs in immunometabolism-associated pathways between NLRC3<sup>WT</sup> and NLRC3<sup>ΔMac</sup> macrophages. The Rich factor is the ratio of DEG numbers annotated in this pathway term to all genes. Coloring of the p-values indicates the significance of the Rich factor ranging from  $-1$  to  $1$ . The 13 common pathway terms of three comparisons enriched in the KEGG database are listed in this figure. The size of the symbols represents the number count of DEGs. (C) Hallmark gene sets of the above datasets showed that the NLRC3-mediated Warburg effect was closely related to mTOR signaling pathways. NES, normalized enrichment score.

**Fig. S9.**

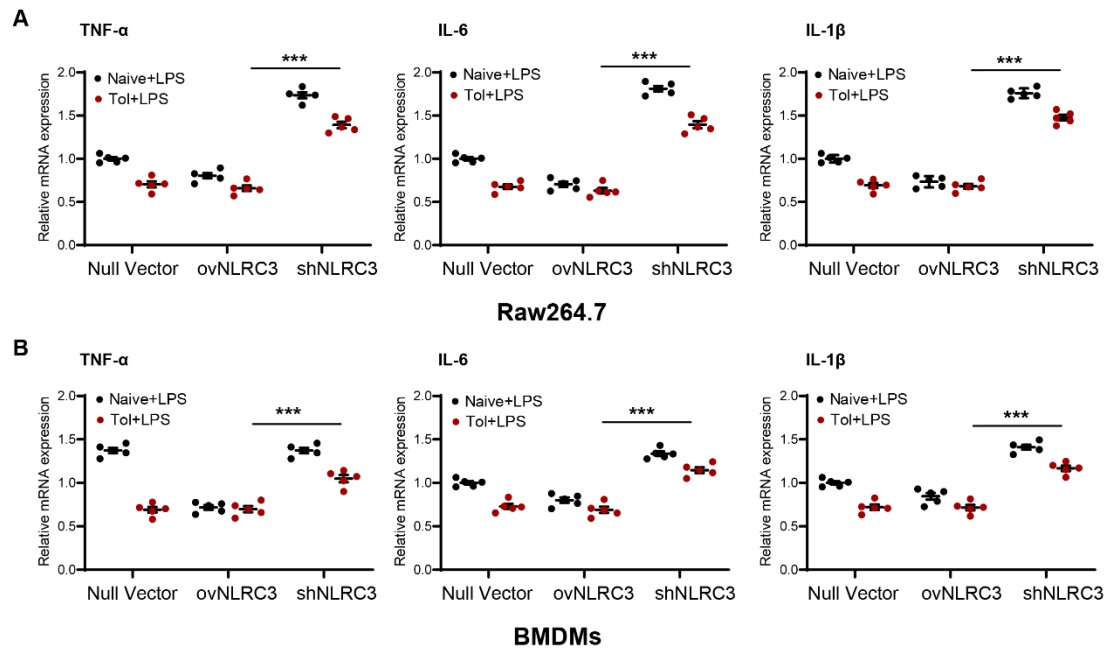

**Fig. S9.** The *in vitro* tolerance model that imitates sepsis-induced immunosuppression. qPCR detection of TNF- $\alpha$ , IL-6, and IL-1 $\beta$  mRNA expression in tolerant or naïve RAW 264.7 (A) and BMDM (B) macrophages transduced with null, shNLRC3, or ovNLRC3 vector after 12-h LPS restimulation (100 ng/mL) (n = 5). The results of mRNA expression were normalized to  $\beta$ -actin. Graphs show the mean  $\pm$  SE of experiment replicates and are representative of five independent experiments; (two-way ANOVA or Student's *t* test)

**Fig. S10.**

**AMs**

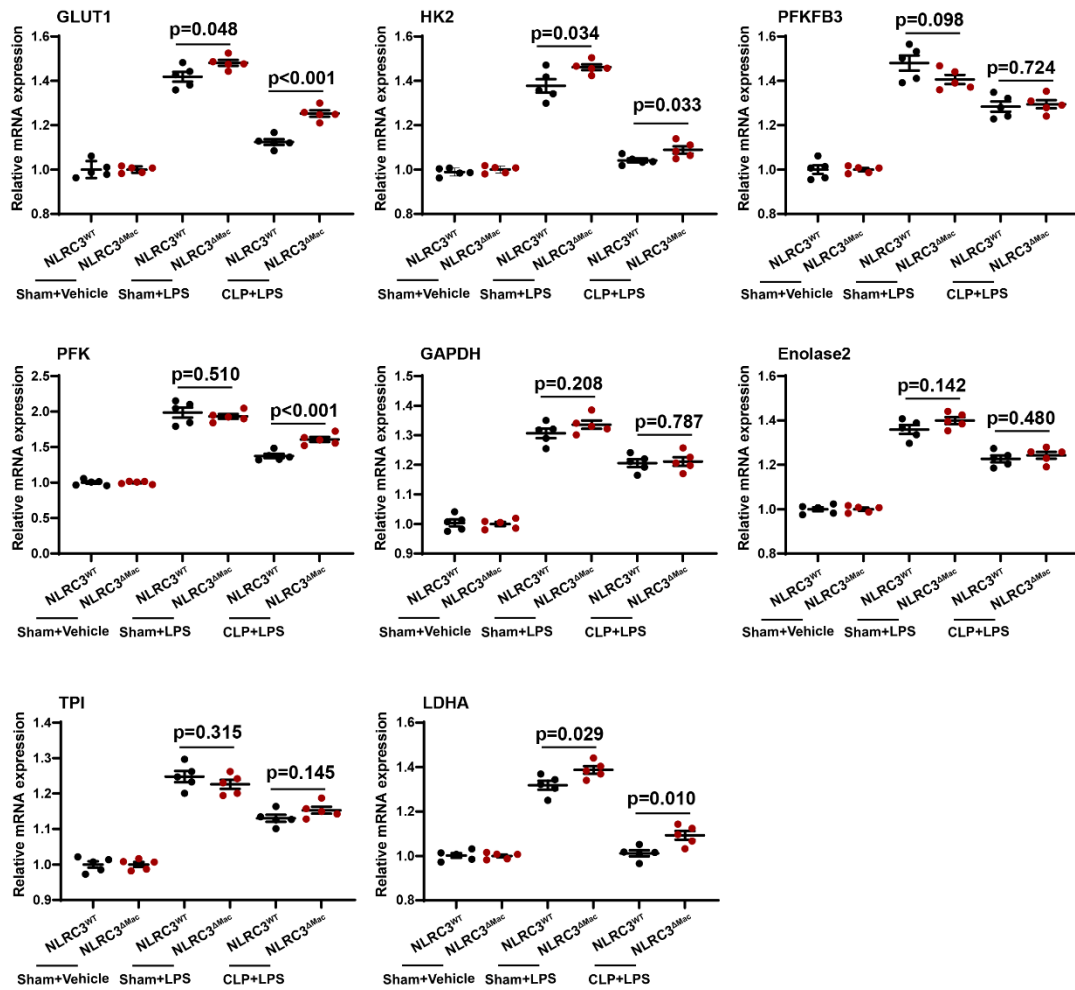

**Fig. S10. Glycolytic gene expression within the macrophage from the indicated genotypes.** Mouse AMs of NLRC3<sup>WT</sup> (LysM-Cre-NLRC3<sup>fl/fl</sup>) (n = 5) and NLRC3<sup>ΔMac</sup> (LysM-Cre<sup>+</sup> NLRC3<sup>fl/fl</sup>) (n = 5) with LPS *in vitro* challenge for 12 h at 48 h after CLP or sham operation (n = 5 mice /each group), qPCR detection of the mRNA expression levels of representative NLRC3-regulated glycolytic gene in macrophages. Circles represent individual mice. Graphs show the mean ± SE of experiment replicates and are representative of five independent experiments; (two-way ANOVA or Student's *t* test).

Fig. S11.

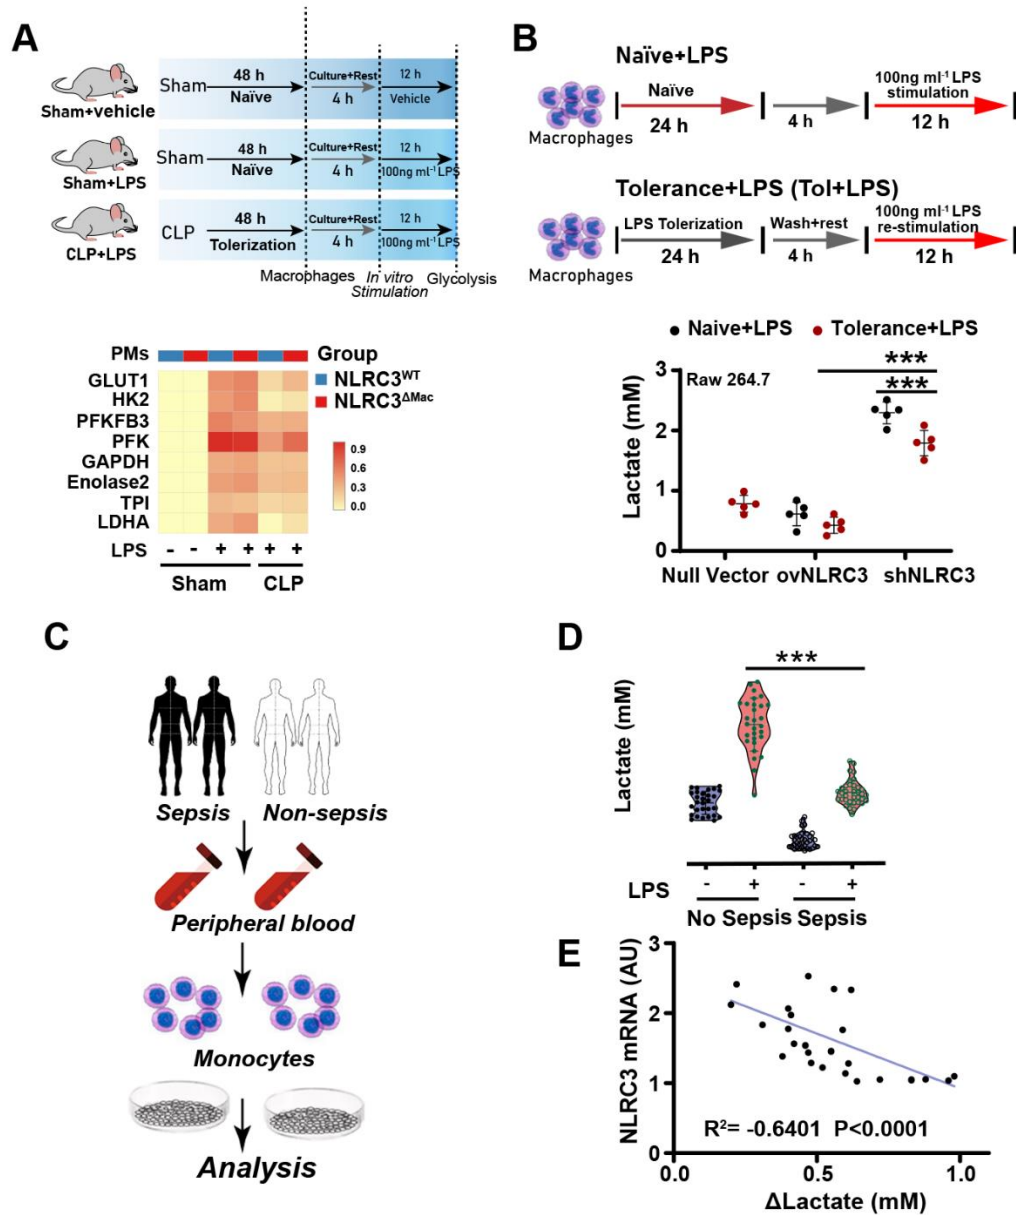

Fig. S11.

**Lactate levels in the macrophages of septic mice, and in the monocytes of septic patients and their correlation with NLRC3 mRNA expression.** (A) qPCR detection of the mRNA expression levels of representative NLRC3-regulated genes involved in glycolysis in PMs. PMs with secondary LPS *in vitro* challenge for 12 h at 48 h after CLP or sham operation (n = 5). The results of mRNA expression were normalized to  $\beta$ -actin, and log2 values were used to calculate correlations. Each column in the heat map represents the ratio of normalized expression (n = 5). (B) RAW 264.7 with null vector, stable NLRC3 deficiency (shNLRC3), or overexpression (ovNLRC3) were tolerized with 100 ng/mL LPS (tolerant) or left untreated (naïve) for 24 h, these cells



washed with PBS, cultured in medium (2 h), and stimulated with 100 ng/mL LPS for 12 h. ELISA for lactate production. (C) Schematic overview of experimental design for (D–E). (D) ELISA for Lactate in the culture supernatants of sepsis patient (n = 21) and non-sepsis donor monocyte (n = 15) stimulated with or without LPS *in vitro* (10 ng/mL) for 12 h (data are presented in a violin plot, *t* test). (E) Correlation assay between NLRC3 and change in lactate production ( $\Delta$ lactate: RPMI-stimulated monocytes versus LPS-stimulated monocytes) in monocytes and from indicated sepsis patients (n = 21). Circles represent individual values. Graphs show the mean  $\pm$  SE of experiment replicates and are representative of at least three independent experiments; \*\*\*P < 0.001 (two-way ANOVA or Student's *t* test).

Fig. S12.

PMs

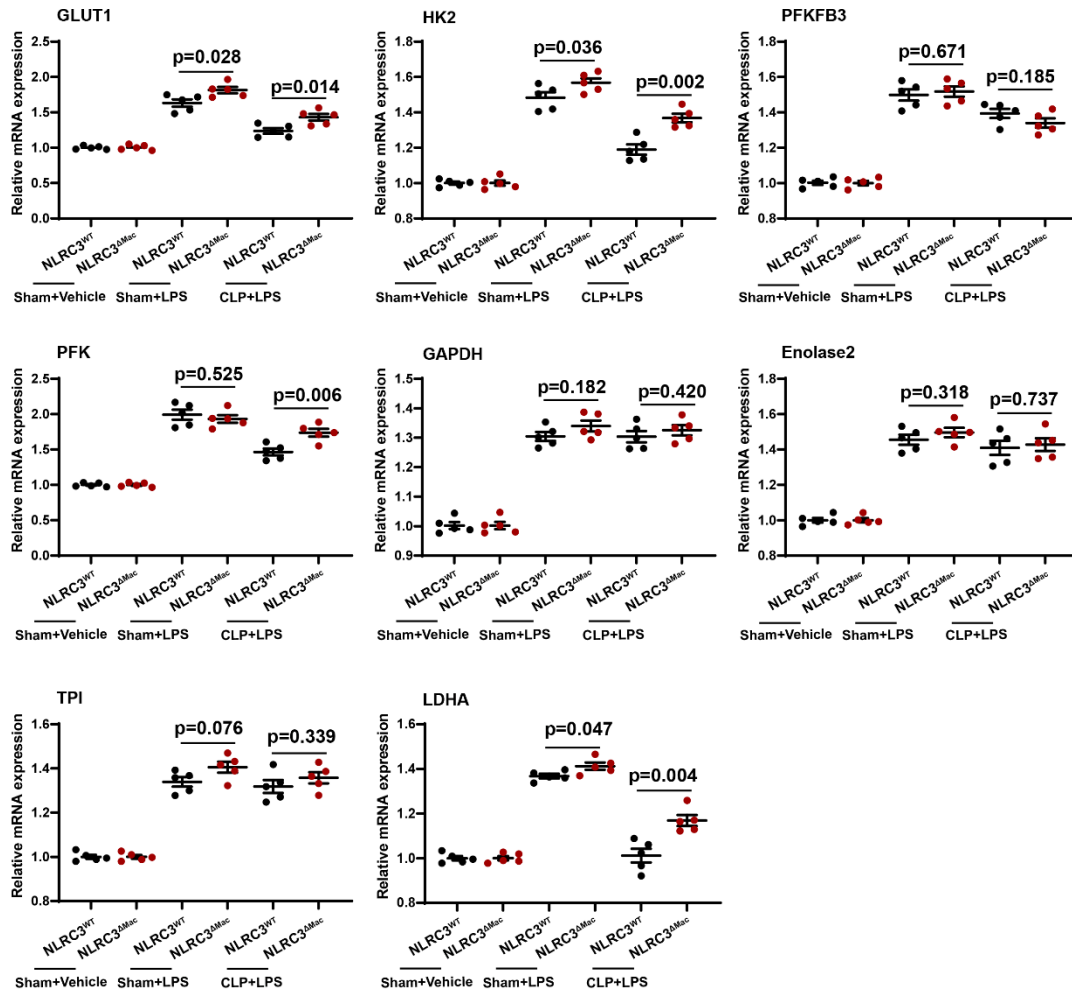

**Fig. S12. Glycolytic gene expression within the macrophage from the indicated genotypes.** Mouse PMs of NLRC3<sup>WT</sup> (LysM-Cre-NLRC3<sup>fl/fl</sup>) (n = 5) and NLRC3<sup>ΔMac</sup> (LysM-Cre<sup>+</sup> NLRC3<sup>fl/fl</sup>) (n = 5) with LPS *in vitro* challenge for 12 h at 48 h after CLP or sham operation (n = 5 mice /each group), qPCR detection of the mRNA expression levels of representative NLRC3-regulated glycolytic gene in macrophages. The results of mRNA expression were normalized to  $\beta$ -actin. Circles represent individual mice. Graphs show the mean  $\pm$  SE of experiment replicates and are representative of five independent experiments; (two-way ANOVA or Student's *t* test).

**Fig. S13.**

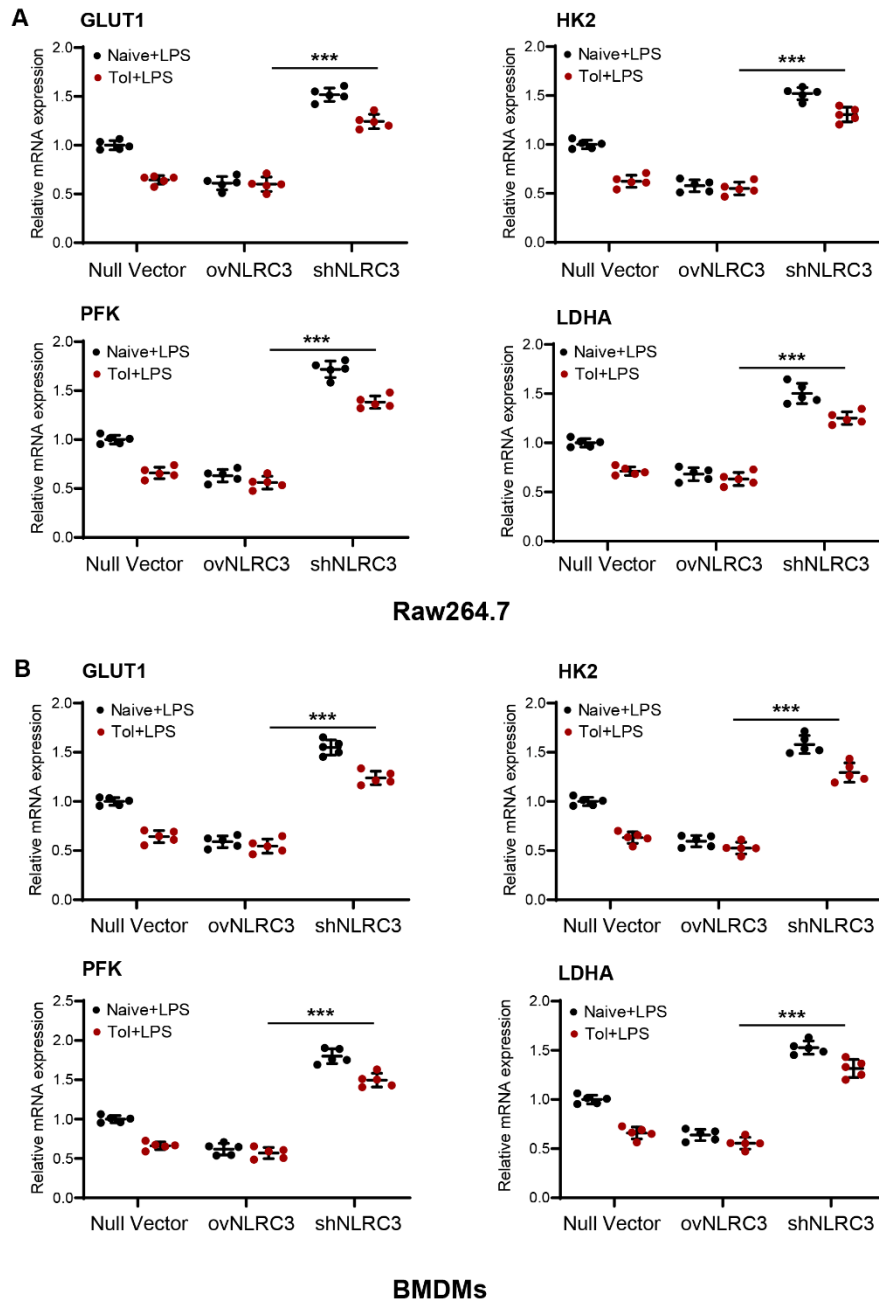

**Fig. S13. Glycolytic gene expression within the macrophage from the indicated genotypes.** RAW 264.7(A) and BMDMs (B) with null vector, NLRC3 deficiency (shNLRC3), or overexpression (ovNLRC3) were tolerized with 100 ng/mL LPS (tolerant) or left untreated (naïve) for 24 h, these cells washed with PBS, cultured in medium (2 h), and stimulated with 100 ng/mL LPS for 12 h. The results of mRNA expression were normalized to  $\beta$ -actin, Circles represent individual values. Graphs show the mean  $\pm$  SE of experiment replicates and are representative of five independent experiments; \*\*\* $P < 0.001$  (two-way ANOVA or Student's  $t$  test).

**Fig. S14.**

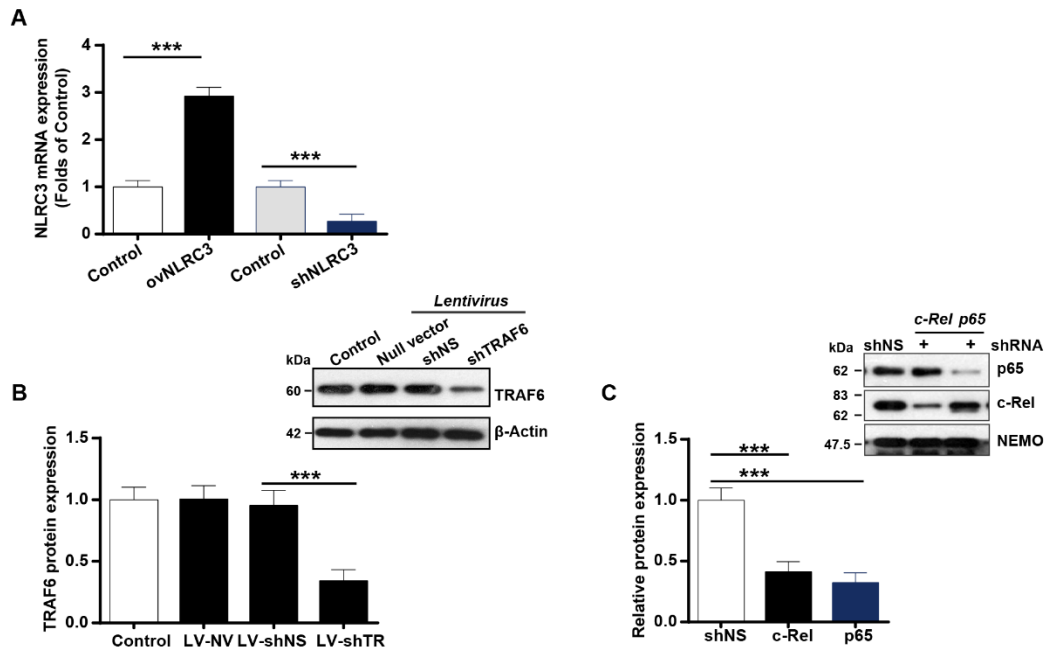

**Fig. S14.**

**RNAi validation in the macrophages.** qPCR to detect NLRC3 mRNA expression in RAW 264.7 stably transduced with shNLRC3 or overexpressing NLRC3 (ovNLRC3) (A) Immunoblots to detect TRAF6, p65 and c-Rel expression (B-C) in RAW 264.7 stably transduced with shNLRC3 after transfection with the indicated vector (shp65, shRel, or shNS). (n = 3). Graphs show the mean  $\pm$  SE of experiment replicates and are representative of at least three independent experiments; \*\*\*P < 0.001; NS, not significant (two-way ANOVA or Student's *t* test).

Fig. S15.

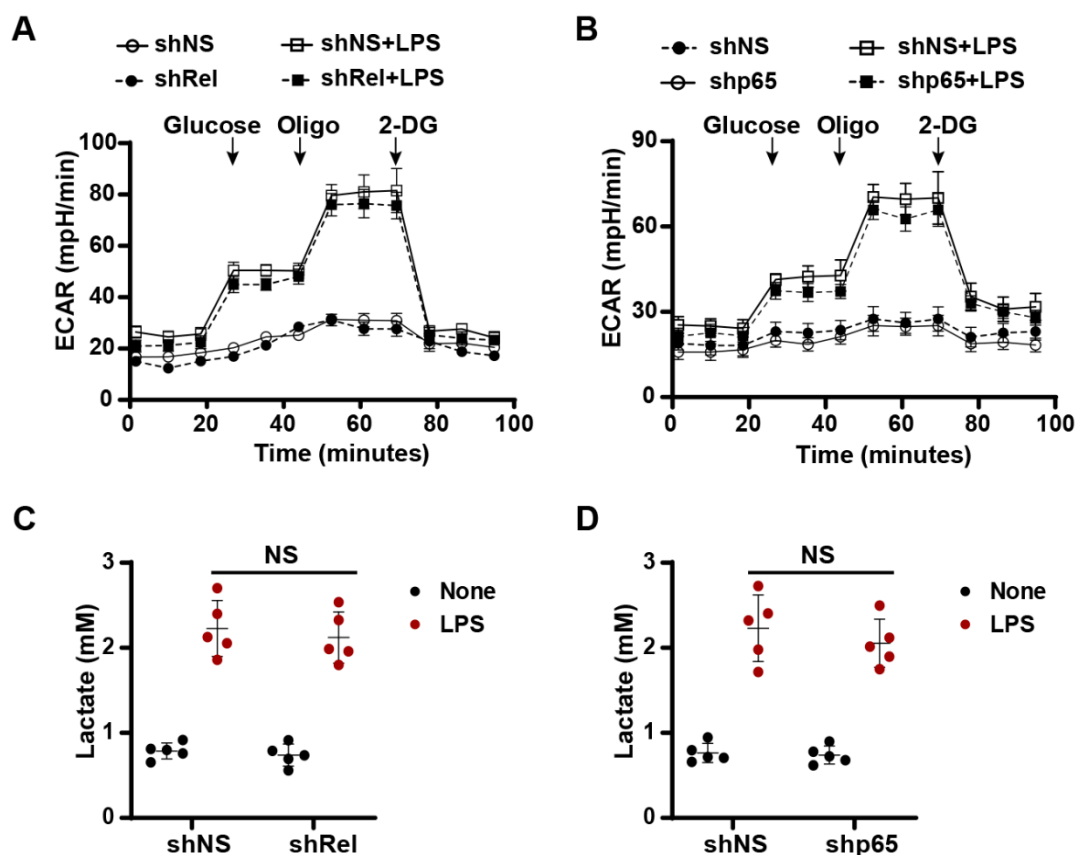

Fig. S15.

**NF- $\kappa$ B subunit depletion in macrophages does not alter NLRC3 deficiency-dependent glycolysis or inflammatory responses.** RAW 264.7 with stable NLRC3 deficiency were transfected with shp65 or shRel or shNS (control) vector, then cells were tolerized with 100 ng/mL LPS (Tol) or left untreated (Naïve) for 24 h. The tolerant cells were washed with PBS, cultured in medium (2 h), and restimulated with 100 ng/mL LPS for 12 h; the Naïve cells were cultured in medium without LPS for 14 h. (A, B) Seahorse XF<sup>24</sup> monitored ECAR. (C, D) ELISAs for lactate production in tolerant BMDMs of NLRC3<sup>ΔMac</sup> with shp65 or shRel or shNS (control) vector after 12-h LPS restimulation (n = 5), the naïve BMDMs with shp65 or shRel or shNS vector in the absence of LPS stimulation served as the control groups. Circles represent individual values. Graphs show the mean  $\pm$  SE of experiment replicates and are representative of at least three independent experiments; NS, not significant (two-way ANOVA or Student's *t* test).

**Fig. S16.**

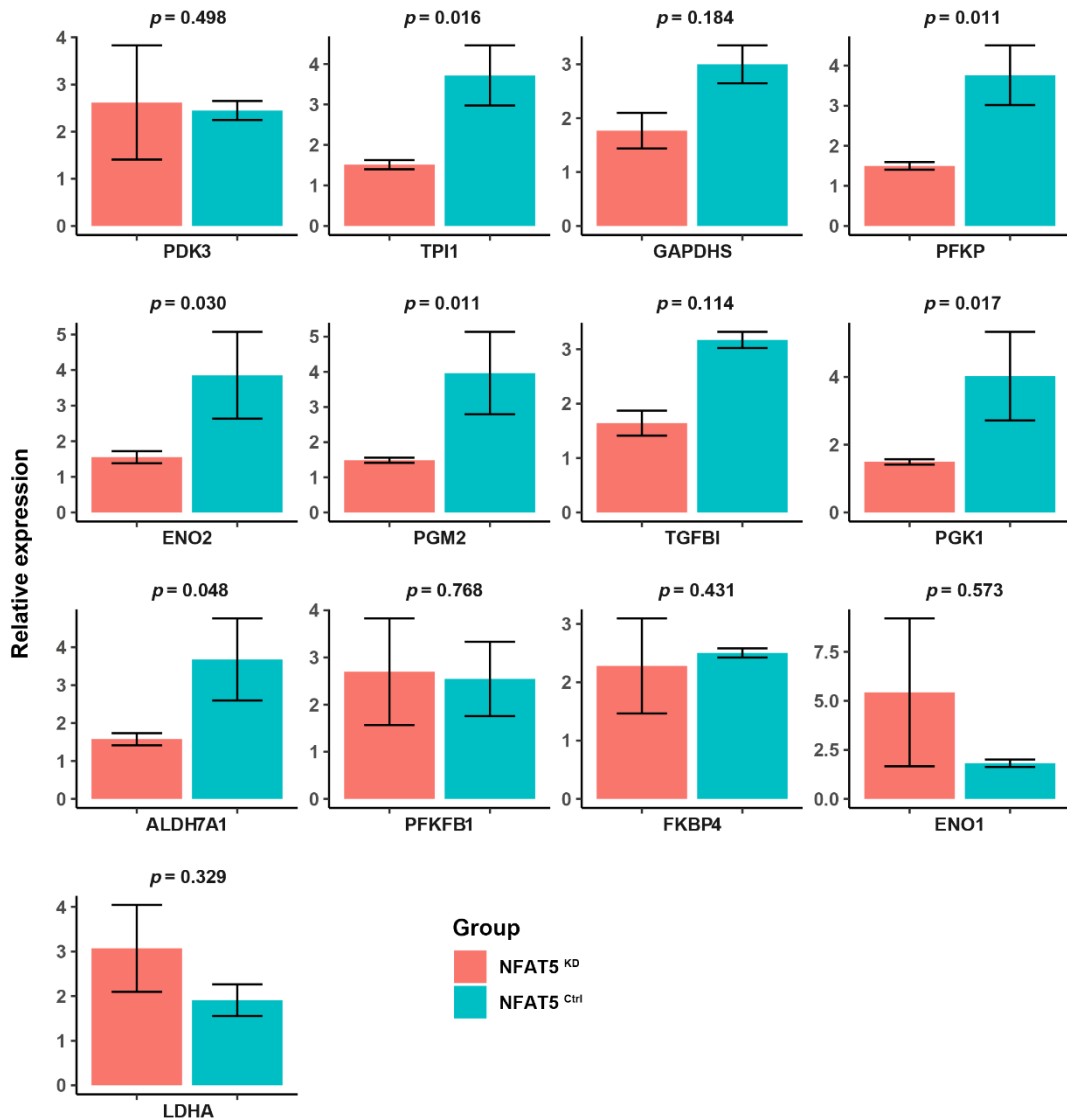

**Fig. S16.**

**Barplots the gene expression in RAW 264.7 with NFAT5 knockdown.** RNA-seq data comparing NFAT5 shRNA (NFAT5<sup>KD</sup>) and transduced empty vector (NFAT5<sup>Ctrl</sup>) RAW 264.7 from the NCBI GEO database (GSE76554). Barplots depicting comparison of relative gene expression of several glycolytic genes of interest between NFAT5<sup>KD</sup> macrophages (n = 3) and NFAT5<sup>Ctrl</sup> macrophages (n = 3). Depicting p values are from Student's t-test. All tests were two-sided.

**Fig. S17.**

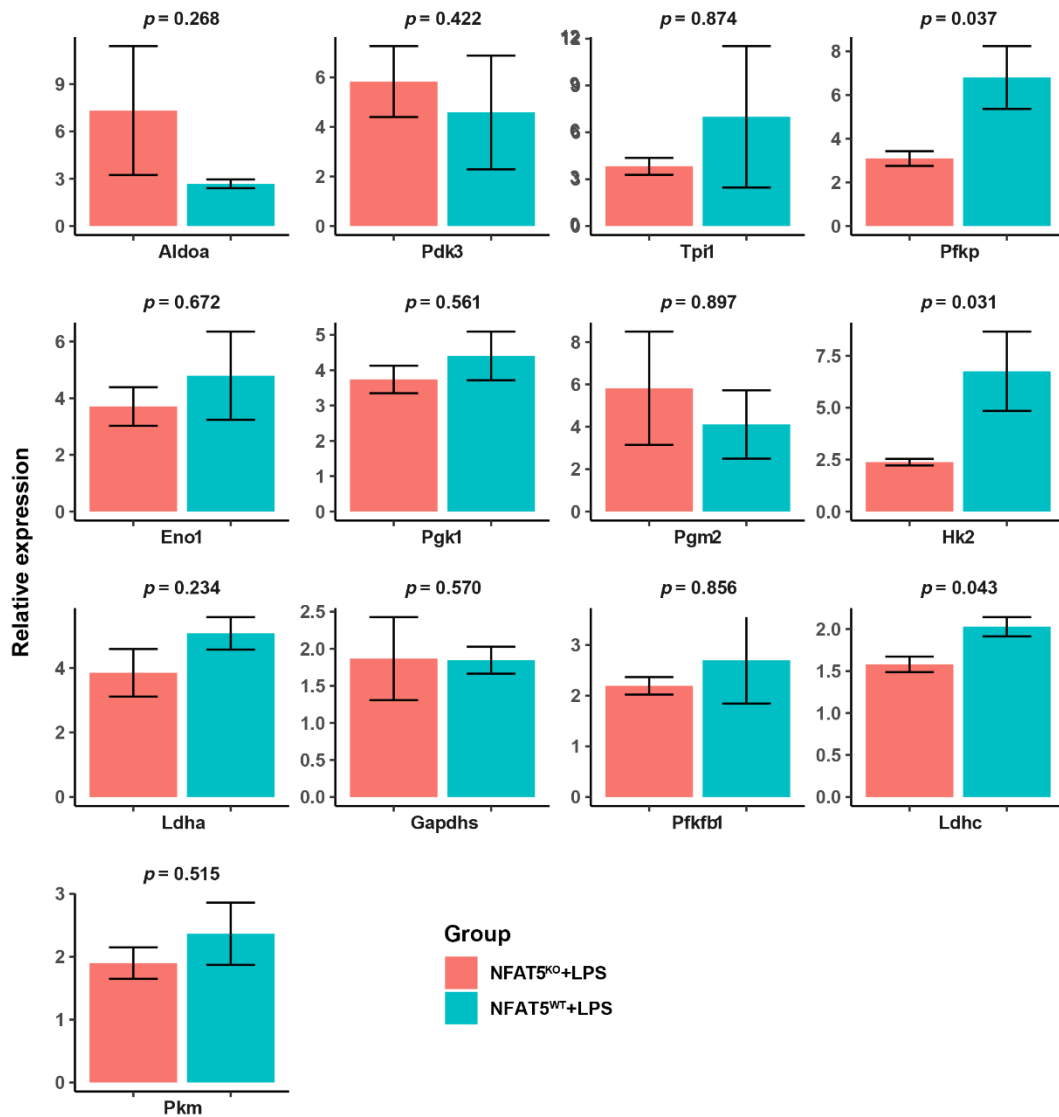

**Fig. S17.**

Barplots the gene expression in BMDMs with NFAT5 knockout. RNA-seq data comparing NFAT5 KO BMDMs (NFAT5<sup>KO</sup>) and NFAT5 WT BMDMs (NFAT5<sup>WT</sup>) from the NCBI GEO database (GSE26343). Barplots depicting comparison of relative gene expression of several glycolytic genes of interest between NFAT5<sup>KO</sup> BMDMs (n = 3) and NFAT5<sup>WT</sup> BMDMs (n = 3). Depicting p values are from Student's t-test. All tests were two-sided.

**Fig. S18.**

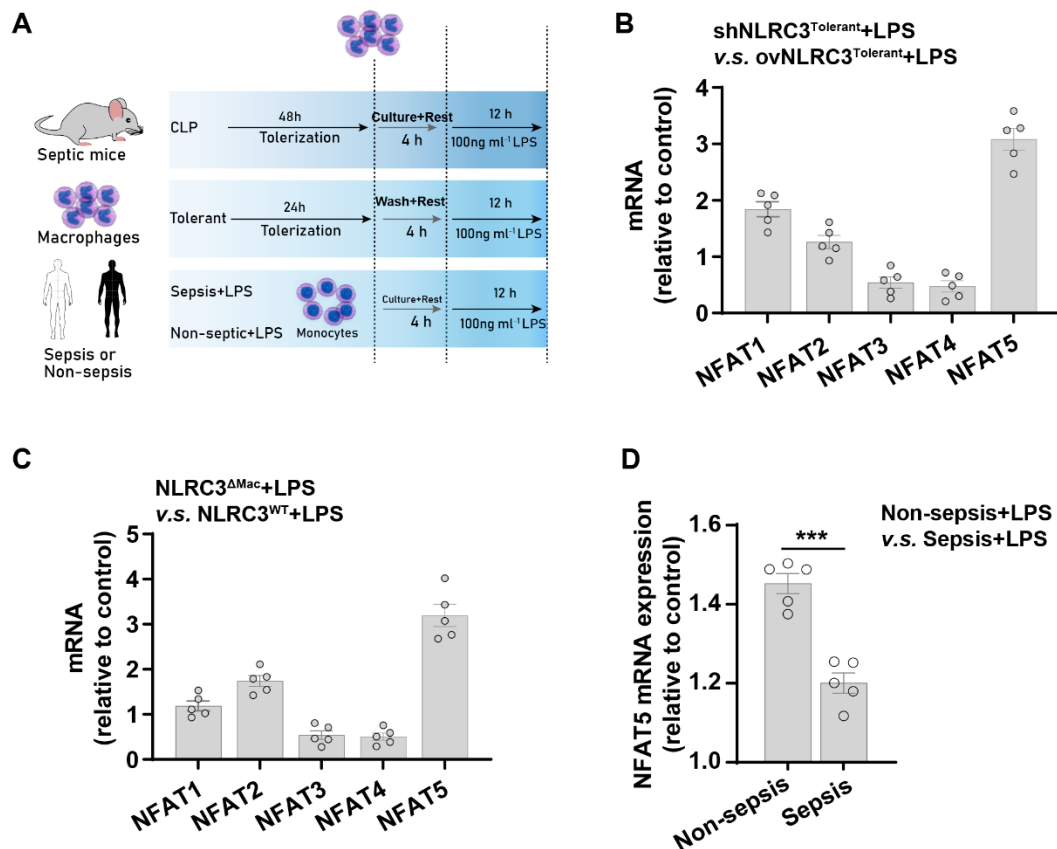

**Fig. S18.**

(A) Schematic overview of experimental design for (B–D). RAW 264.7 with stable NLRC3 deficiency (shNLRC3) or overexpression (ovNLRC3) were tolerized with 100 ng/mL LPS (Tol) or left untreated (naïve) for 24 h, the tolerant cells washed with PBS, cultured in medium (2 h), and restimulated with 100 ng/mL LPS for 12 h, the Naïve cells were cultured for 14 h in medium without LPS. (B–D) Real-time PCR to detect the NFAT1-5 mRNA expression (n = 5) in RAW 264.7, in PMs from mice of the indicated genotypes at 48 h after CLP operation (n = 5), and in monocytes from the septic patients or non-septic donors (n = 5) (D). Cells without LPS treatment served as corresponding control group. Circles represent individual values. Graphs show the mean ± SE of experiment replicates and are representative of at least three independent experiments; \*\*P < 0.01; \*\*\*P < 0.001; (two-way ANOVA or Student's *t* test).



**Fig. S19.**

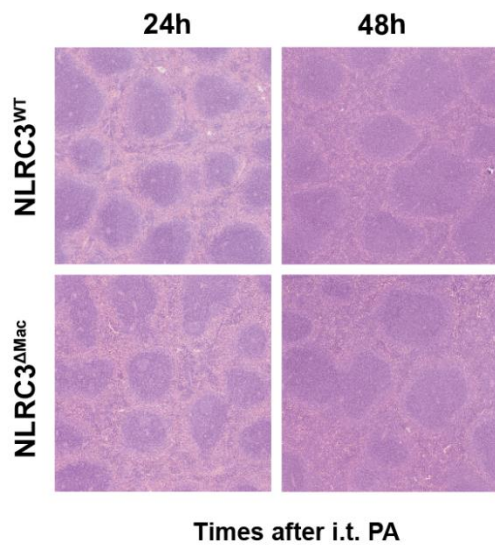

**Fig. S19.**

**NLRC3 depletion in myeloid cells does not aggravate spleen injury in septic mice that underwent sepsis-induced immunosuppression** The surviving mice of indicated genotypes (NLRC3<sup>WT</sup> or NLRC3<sup>ΔMac</sup> mice) underwent secondary *P. aeruginosa* infection. *P. aeruginosa* ( $1 \times 10^9$  CFU) were administered intratracheally 2 days after CLP or sham operation. Histopathological images of spleen tissues. Scale bar represents 50 μm (n = 6 mice/group).

**Table S1.**

**Primers for validation of myeloid lineage-specific conditional NLRC3-null mice.  
Related to materials and methods.**

| Primer name | Primer sequence (5'-3')     |
|-------------|-----------------------------|
| L-GT-F1     | GATGTACCAACAAAATGCTTAGCTCTC |
| L-GT-R1     | GACGCCTAGATTGTGCTACTCTCAGCT |
| R-GT-F1     | CGTGCTAGATCGACTGCTAGAGTGAC  |
| R-GT-R1     | CCATCTCCACACTGATCTCCTCTCC   |

**Table S2.****Human and mouse primers for RT-PCR. Related to materials and methods.**

| <b>Gene name</b>     | <b>Forward primer</b>     | <b>Reverse primer</b>    |
|----------------------|---------------------------|--------------------------|
| human NLRC3          | GTGCCGACCGACTCATCTG       | GTCCTGCACTCATCCAAGC      |
| human TNF- $\alpha$  | GGCATTGATGACTCCAGTGTT     | ATGGAGCCCAGCAGCAA        |
| human $\beta$ -actin | TTGAAGGCTGGATTTCCCTTTGGGC | TCGTGCGAGATGAAATAGGGCTGT |
| mouse NLRC3          | GTCAGCTGCTACAAGTCCGGGAC   | GAGCCTCAGAGTGTTCCGGTATCC |
| mouse TNF- $\alpha$  | CATCTTCTCAAATTCGAGTGACAA  | TGGGAGTAGACAGGTACAACCC   |
| mouse IL-1 $\beta$   | CGGCACACCCACCCTG          | AAACCTTTTTCCATCTTCTTCT   |
| mouse IL-6           | CTGCAAGAGATTCCATCCAGTT    | GAAGTAGGGAAGGCCGTGG      |
| mouse GLUT1          | CCCAACTTCTTCAAGATGGTGG    | AGAGGCTCAACCATGGTTGC     |
| mouse Hk2            | TGATCGCCTGCTTATTCACGG     | AACCGCCTAGAAATCTCCAGA    |
| mouse LDHA           | CATTGTCAAGACAGTCCACACT    | AACCGCCTAGAAATCTCCAGA    |
| mouse PFK1           | GGAGGCGAGAACAACAAGCC      | CGGCCTTCCCTCGTAGTGA      |
| mouse PFKFB3         | CCCAGAGCCGGGTACAGAA       | GGGGAGTGGTCAGCTTCG       |
| mouse Enolase2       | TGCGTCCACTGGCATCTAC       | CAGAGCAGGCGCATAGTTTTA    |
| mouse TPI            | CCAGGAAGTCTTCGTTGGGG      | CAAAGTCGATGTAAGCGGTGG    |
| mouse NFAT1          | GACCCGGAGTTCGACTTCG       | TGACACTAGGGGACACATAACTG  |
| mouse NFAT2          | CTCGGCCTTTGCCCATCTC       | AGGAGCACGGAGCATCTGA      |
| mouse NFAT3          | TGCTCAACTTCCGTCAAGGAC     | GATGTGGTAAGCCAAGGGATG    |
| mouse NFAT4          | GAGCTGGAATTTAAGCTGGTGT    | CATGGAGGGGTATCCTCTGAG    |
| mouse NFAT5          | TGCTTTCTCAGCTTACCACGG     | GTCCGCACAACATAGGGCTC     |
| mouse $\beta$ -actin | CCGTAAAGACCTCTATGCCAACAC  | CCACACAGAGTACTTGCGCTCA   |

**Table S3.****Demographic and clinical characteristics of the septic patients, Related to Figure 1**

|                                               | <b>All patients<br/>(n = 64)</b> | <b>Sepsis<br/>(n = 35)</b> | <b>Non-Sepsis<br/>(n = 29)</b> |
|-----------------------------------------------|----------------------------------|----------------------------|--------------------------------|
| Age, years, mean ( $\pm$ SD)                  | 64.0 $\pm$ 14.9                  | 64.0 $\pm$ 13.5            | 64.1 $\pm$ 16.7                |
| Male                                          | 39 (60.9)                        | 19 (54.3)                  | 20 (69.0)                      |
| SOFA                                          | 8 [6- 9]                         | 8 [7 - 9]                  | 6 [5 - 8]                      |
| Time from sepsis onset to ICU admission, days | -                                | 9 [7–12]                   | -                              |
| <b>Source of Infection</b>                    |                                  |                            |                                |
| Abdominal                                     | 26 (40.6)                        | 26 (74.3)                  | 0 (0.0)                        |
| Pulmonary                                     | 19 (29.7)                        | 19(54.3)                   | 0 (0.0)                        |
| Urinary                                       | 6 (9.4)                          | 6 (17.1)                   | 0 (0.0)                        |
| Soft tissue                                   | 3 (4.7)                          | 3 (8.6)                    | 0 (0.0)                        |
| Others                                        | 7 (10.9)                         | 7 (20.0)                   | 0 (0.0)                        |
| <b>Microbiology laboratory</b>                |                                  |                            |                                |
| Gram-negative bacteria                        | 32 (50.0)                        | 32 (91.4)                  | 0 (0.0)                        |
| Gram-positive bacteria                        | 9 (14.1)                         | 9 (25.7)                   | 0 (0.0)                        |
| Others                                        | 4 (11.1)                         | 4 (19.1)                   | 0 (0.0)                        |
| <b>Secondary pulmonary infection</b>          | 19 (29.7)                        | 19 (54.3)                  | 0 (0.0)                        |
| <b>Chronic comorbidity</b>                    |                                  |                            |                                |
| Diabetes                                      | 6 (9.4)                          | 4 (11.4)                   | 2 (6.9)                        |
| Cardiovascular insufficiency                  | 10 (15.6)                        | 5 (14.3)                   | 5 (17.2)                       |
| Respiratory insufficiency                     | 5 (7.8)                          | 2 (5.7)                    | 3 (10.3)                       |
| Others                                        | 22 (34.4)                        | 12 (34.3)                  | 10 (34.5)                      |
| <b>Interventions in ICU</b>                   |                                  |                            |                                |
| Central venous catheter                       | 49 (76.6)                        | 30 (85.7)                  | 19 (65.5)                      |
| Surgical drain                                | 38 (59.4)                        | 24 (68.6)                  | 14 (48.3)                      |
| Mechanical ventilation                        | 62 (96.9)                        | 35 (100.0)                 | 27 (93.1)                      |
| Renal replacement therapy                     | 17 (26.6)                        | 13 (37.1)                  | 4 (13.8)                       |
| <b>Outcome</b>                                |                                  |                            |                                |
| Hospital stay, median (IQR), d                | 16.5 [11 –24]                    | 20 [10 – 27]               | 15 [12 – 21]                   |
| ICU stay, median (IQR), d                     | 8 [3 –14.0]                      | 14 [9 – 23]                | 5 [2 – 6]                      |
| 28-day mortality, n (%)                       | 14 (21.9)                        | 14 (40.0)                  | 0 (0.0)                        |

**Abbreviations:** ICU, intensive care unit; IQR, interquartile range; SOFA, sequential organ failure assessment; SD, standard deviation;  
Data were expressed as count (%) unless otherwise.

**Table S4. key reagent**

| <b>REAGENT</b>                                | <b>SOURCE</b>             | <b>IDENTIFIER</b> |
|-----------------------------------------------|---------------------------|-------------------|
| TruStain fcX (anti-mouse CD16/32)             | Biologend                 | Cat#101320        |
| Anti-mouse CD11b, FITC, Clone M1/70           | BD Biosciences            | Cat#561688        |
| Anti-mouse F4/80, BV421, Clone T45-2342       | BD Biosciences            | Cat#565411        |
| Anti-mouse CD11c, BB700, Clone HL3            | BD Biosciences            | Cat#566505        |
| Anti-mouse Ly-6G Ly-6C, BV605, Clone RB6-8C5  | BD Biosciences            | Cat#563299        |
| Anti-mouse CD86, PE-Cy7, Clone GL1            | BD Biosciences            | Cat#560582        |
| Anti-mouse CD206, Alexa 647, Clone MR5D3      | BD Biosciences            | Cat#565250        |
| Anti-mouse I-A I-E, PE, Clone M5/114.15.2     | BD Biosciences            | Cat#562010        |
| Anti-human anti-CD14, Alexa 700, clone63D3    | BioLegend                 | Cat#367114        |
| Anti-human anti-HLA-DR, Alexa 488, cloneL243  | BioLegend                 | Cat#307619        |
| Mouse HLA-DR, PE, Clone TU36                  | BD Biosciences            | Cat#555561        |
| Mouse CD14, FITC, Clone M5E2                  | BD Biosciences            | Cat#555397        |
| Anti-NLRC3                                    | Abcam                     | Cat#ab77817       |
| Anti-p65 (S536), clone: 93H1                  | Cell Signaling Technology | Cat#3033          |
| Anti-NFAT, clone: D43B1                       | Cell Signaling Technology | Cat#5861          |
| Anti-NFAT5                                    | Abcam                     | Cat# ab3446       |
| Anti-p mTOR (Ser2448), clone: D9C2            | Cell Signaling Technology | Cat#5536          |
| Anti-p4E-BP1 (Thr37/46), clone: 236B4         | Cell Signaling Technology | Cat#2855          |
| Anti-pS6K (Thr389)                            | Cell Signaling Technology | Cat#9205          |
| Anti-TRAF6, Clone: D-10                       | Santa Cruz Biotechnology  | Cat# sc-8409      |
| Anti-K63 Ub, Clone: D7A11                     | Cell Signaling Technology | Cat# 5621S        |
| HRP-linked anti-mouse IgG secondary antibody  | Cell Signaling Technology | Cat#7076          |
| HRP-linked anti-rabbit IgG secondary antibody | Cell Signaling Technology | Cat#7074          |
| Fixation Buffer                               | Biologend                 | Cat#420801        |
| Intracellular Permeabilization Wash Buffer    | Biologend                 | Cat#421002        |
| Collagenase IV                                | Sigma                     | Cat#C5138         |
| Deoxyribonuclease I                           | Sigma                     | Cat# 9003-98-9    |
| ACK lysing buffer                             | GIBCO                     | Cat#A1049201      |
| Protein A agarose beads                       | Cell Signaling Technology | Cat#9863          |

|                                                      |                           |                |
|------------------------------------------------------|---------------------------|----------------|
| SuperSignal West Pico Chemiluminescent Substrate     | Thermo Fisher Scientific  | Cat#34580      |
| SuperSignal West Femto Maximum Sensitivity Substrate | Thermo Fisher Scientific  | Cat#34095      |
| RNAiso Plus                                          | TaKaRa                    | Cat#9109       |
| Seahorse XF <sup>c</sup> 24 FluxPax mini             | Agilent                   | Cat#102342-100 |
| Human TNF- $\alpha$ ELISA kit                        | Caymanchem                | Cat#589201     |
| Pierce <sup>TM</sup> Agarose CHIP kit                | Thermo Fisher Scientific  | Cat#26156      |
| BCA assay kit                                        | Cell Signaling Technology | Cat#7780       |
